# Supplementary material for: Formation of the intradimer disulfide bond in human calprotectin maintains metal-withholding function and tunes proteolytic susceptibility
Source: Royal Society of Chemistry journal article supplement (doi:10.1039/d6sc02543a), 2026-06-04
Supplement: d6sc02543a1.pdf [file d6sc02543a1.pdf]

## Supplementary Information for

### **Formation of the intradimer disulfide bond in human calprotectin maintains metal-withholding function and tunes protein susceptibility**

Aurelio Mollo,\* Emma Y. Cool,\* Bahar Sakar,\* Kushol Gupta,<sup>†</sup> and Elizabeth M. Nolan\*

\*Department of Chemistry, Massachusetts Institute of Technology, Cambridge, MA 02139, United States

<sup>†</sup>Department of Biochemistry & Biophysics, Perelman School of Medicine, University of Pennsylvania, Philadelphia, PA 19104, United States

Corresponding author: Elizabeth M. Nolan (Email: [lnolan@mit.edu](mailto:lnolan@mit.edu), Tel: 617-452-2495)

This Supplementary Information includes:

## Experimental Methods

|                                                                            |     |
|----------------------------------------------------------------------------|-----|
| General Materials and Methods .....                                        | S6  |
| Expression and Purification of Calprotectin (CP) and Variants .....        | S7  |
| General Microbiology .....                                                 | S7  |
| Western Blot Analysis of CP Subunits .....                                 | S7  |
| Inductively Coupled Plasma Mass Spectrometry (ICP-MS) .....                | S8  |
| Preparation of dslCP .....                                                 | S9  |
| HPLC Analysis of CP Subunits and dslCP .....                               | S10 |
| Quadrupole Time-of-Flight (Q-TOF) Detection of CP Subunits and dslCP ..... | S10 |
| Tryptic MS Analysis of dslCP .....                                         | S11 |
| Thiol Quantification Assay .....                                           | S12 |
| Circular Dichroism (CD) Spectroscopy .....                                 | S12 |
| Analytical Size Exclusion Chromatography (SEC) .....                       | S13 |
| Metal Depletion Assays .....                                               | S14 |
| Antimicrobial (AMA) Assays .....                                           | S15 |
| Chrome Azurol S (CAS) Assay .....                                          | S15 |
| Protease Susceptibility Assays .....                                       | S17 |
| SV-AUC Analysis of dslCP and CP-Ser .....                                  | S17 |
| Midpoint Potential ( $E_m$ ) Determination of dslCP .....                  | S18 |
| Thioredoxin Susceptibility Assays .....                                    | S19 |

## Supplementary Discussion

|                                                                           |     |
|---------------------------------------------------------------------------|-----|
| Determining the Midpoint Potential by Fitting to Nernst-Type Models ..... | S21 |
|---------------------------------------------------------------------------|-----|

## Supplementary Figures

|                                                                                                              |     |
|--------------------------------------------------------------------------------------------------------------|-----|
| <b>Figure S1.</b> Oxidation of CP by GSSG and DTT <sub>ox</sub> .....                                        | S23 |
| <b>Figure S2.</b> Q-TOF-MS detection of dslCP and dslCP-MetO .....                                           | S24 |
| <b>Figure S3.</b> Detection of dslCP-MetO under different H <sub>2</sub> O <sub>2</sub> concentrations ..... | S25 |
| <b>Figure S4.</b> Oxidation of CP to dslCP is not pH-dependent .....                                         | S26 |
| <b>Figure S5.</b> Anion exchange chromatography of the dslCP preparation .....                               | S26 |

|                                                                                                                               |     |
|-------------------------------------------------------------------------------------------------------------------------------|-----|
| <b>Figure S6.</b> Schematic of tryptic products of S100A8 and S100A9 around the location of the disulfide bond in dsICP ..... | S27 |
| <b>Figure S7.</b> Tryptic peptide analysis of dsICP in the presence of reductant .....                                        | S28 |
| <b>Figure S8.</b> Tryptic peptide analysis of dsICP in the absence of reductant .....                                         | S30 |
| <b>Figure S9.</b> CD spectra of dsICP and CP ± Ca(II).....                                                                    | S32 |
| <b>Figure S10.</b> Thermal denaturation curves of dsICP and CP ± Ca(II).....                                                  | S33 |
| <b>Figure S11.</b> Individual thermal denaturation curves for dsICP –Ca(II) .....                                             | S34 |
| <b>Figure S12.</b> Standard curve for SEC molecular weight calculations .....                                                 | S35 |
| <b>Figure S13.</b> Metal content of filtered and unfiltered CDM.....                                                          | S36 |
| <b>Figure S14.</b> Metal content of filtered and unfiltered Tris:TSB .....                                                    | S37 |
| <b>Figure S15.</b> Metal content of filtered and unfiltered Tris:YPD .....                                                    | S38 |
| <b>Figure S16.</b> Antimicrobial activity of dsICP, CP and CP-Ser against the selected microbial panel in CDM.....            | S39 |
| <b>Figure S17.</b> Antimicrobial activity of dsICP, CP and CP-Ser against the selected microbial panel in Tris:TSB .....      | S40 |
| <b>Figure S18.</b> Antimicrobial activity of dsICP, CP and CP-Ser against <i>C. albicans</i> in Tris:YPD .....                | S41 |
| <b>Figure S19.</b> Unnormalized siderophore content of bacterial supernatants.....                                            | S42 |
| <b>Figure S20.</b> Representative HPLC time course of dsICP + HNE + Ca(II) .....                                              | S43 |
| <b>Figure S21.</b> Representative HPLC time course of dsICP + HNE + Ca(II) + Mn(II).....                                      | S44 |
| <b>Figure S22.</b> Representative HPLC time course of CP-Ser + HNE + Ca(II) .....                                             | S45 |
| <b>Figure S23.</b> Representative HPLC time course of CP-Ser + HNE + Ca(II) + Mn(II).....                                     | S46 |
| <b>Figure S24.</b> Representative HPLC time course of CP-Ser <sup>I60E</sup> + HNE + Ca(II) .....                             | S47 |
| <b>Figure S25.</b> Representative HPLC time course of CP-Ser <sup>I60E</sup> + HNE + Ca(II) + Mn(II).....                     | S48 |
| <b>Figure S26.</b> Representative HPLC time courses of dsICP + trypsin ± Mn(II) .....                                         | S49 |
| <b>Figure S27.</b> Representative HPLC time courses of CP-Ser + trypsin ± Mn(II) .....                                        | S50 |
| <b>Figure S28.</b> Representative HPLC time courses of CP-Ser <sup>I60E</sup> + trypsin ± Mn(II) .....                        | S51 |
| <b>Figure S29.</b> Sedimentation boundaries and residuals for dsICP analyzed by SV-AUC (rep 1/2) .....                        | S52 |
| <b>Figure S30.</b> Sedimentation boundaries and residuals for CP-Ser analyzed by SV-AUC (rep 1/2) .....                       | S53 |

|                                                                                                                                          |     |
|------------------------------------------------------------------------------------------------------------------------------------------|-----|
| <b>Figure S31.</b> 2D $c(S)-f/f_0$ distributions for dsICP analyzed by SV-AUC (rep 1/2) .....                                            | S54 |
| <b>Figure S32.</b> 2D $c(S)-f/f_0$ distributions for CP-Ser analyzed by SV-AUC (rep 1/2) .....                                           | S55 |
| <b>Figure S33.</b> Sedimentation boundaries and residuals for dsICP<br>analyzed by SV-AUC (rep 2/2) .....                                | S56 |
| <b>Figure S34.</b> Sedimentation boundaries and residuals for CP-Ser<br>analyzed by SV-AUC (rep 2/2) .....                               | S57 |
| <b>Figure S35.</b> 2D $c(S)-f/f_0$ distributions for dsICP analyzed by SV-AUC (rep 2/2) .....                                            | S58 |
| <b>Figure S36.</b> 2D $c(S)-f/f_0$ distributions for CP-Ser analyzed by SV-AUC (rep 2/2) .....                                           | S59 |
| <b>Figure S37.</b> Unnormalized $c(S)$ distributions from SV-AUC analysis<br>of dsICP and CP-Ser (both replicates) .....                 | S60 |
| <b>Figure S38.</b> Nernst equation fits to dsICP midpoint potential data .....                                                           | S61 |
| <b>Figure S39.</b> N-ethylmaleimide prevents adventitious oxidation of<br>S100A9 <sub>red</sub> during sample storage and handling ..... | S62 |
| <b>Figure S40.</b> 0–10 min time course for dsICP reduction by the Trx system.....                                                       | S63 |
| <b>Figure S41.</b> Thioredoxin reaction controls .....                                                                                   | S64 |
| <b>Figure S42.</b> Uncut Western blots from <b>Figure 9B</b> of the main text .....                                                      | S65 |
| <b>Figure S43.</b> Exponential decay fits and $t_{1/2}$ values of thioredoxin-<br>catalyzed reduction reactions of dsICP .....           | S66 |

## Supplementary Tables

|                                                                                                            |     |
|------------------------------------------------------------------------------------------------------------|-----|
| <b>Table S1.</b> Sequences and molecular weights of S100A8 and S100A9 subunits .....                       | S67 |
| <b>Table S2.</b> Identities and molecular weights of oxidized CP species .....                             | S67 |
| <b>Table S3.</b> Metal ion stocks used .....                                                               | S67 |
| <b>Table S4.</b> Molecular weights and extinction coefficients of<br>commercially purchased proteins ..... | S68 |
| <b>Table S5.</b> Theoretical vs. observed $m/z$ of CP species (Q-TOF MS) .....                             | S68 |
| <b>Table S6.</b> Quantification of free thiols in CP and dsICP .....                                       | S68 |
| <b>Table S7.</b> Theoretical and observed $m/z$ values for dsICP tryptic peptides .....                    | S69 |
| <b>Table S8.</b> Thermal denaturation melting temperatures for dsICP and CP .....                          | S69 |
| <b>Table S9.</b> Molecular weights from SEC chromatograms of dsICP and CP .....                            | S69 |
| <b>Table S10.</b> Strains used in this study .....                                                         | S70 |
| <b>Table S11.</b> Parameters used for SV-AUC $c(S)$ analyses of dsICP and CP-Ser .....                     | S70 |
| <b>Table S12.</b> Parameters derived from SV-AUC $c(S)$ analyses of                                        |     |

|                                                                                                      |     |
|------------------------------------------------------------------------------------------------------|-----|
| dsICP and CP-Ser .....                                                                               | S71 |
| <b>Table S13.</b> Parameters derived from SV-AUC $c(S, f/f_0)$ analyses of<br>dsICP and CP-Ser ..... | S72 |
| <b>Table S14.</b> Nernst equation fitting results of $-Ca(II) E_m$ data.....                         | S72 |
| <b>Table S15.</b> Nernst equation fitting results of $+Ca(II) E_m$ data.....                         | S72 |
| <b>Table S16.</b> Selection of midpoint potential values .....                                       | S73 |
| <b>Supplementary References</b> .....                                                                | S74 |

## Experimental Methods

### *General Materials and Methods*

All solvents and chemicals were purchased from commercial suppliers and used as received. Buffers and metal solutions were prepared using Milli-Q water (18.2 M $\Omega$ ·cm, 0.22- $\mu$ m filter, Millipore). For pH adjustments, reagent-grade NaOH (EMSURE<sup>®</sup>, Sigma) and HCl (ACS grade, Sigma) were used. Unless otherwise specified, buffers were prepared using ultrahigh-purity grade HEPES (ULTROL<sup>®</sup> grade, Sigma), Tris (Ultra-Pure, VWR) and/or NaCl (Suprapur<sup>®</sup>, Sigma). To prevent metal contamination from glass, buffers were stored in polypropylene tubes and bottles.

In cases where even trace levels of metals could interfere with experiments, the buffers were mixed with Chelex<sup>®</sup> 100 resin (Bio-Rad, #142-2842, 10 g/L). Following an incubation period, the resin was removed by means of a 0.45- $\mu$ m filter and the pH of the buffer readjusted.

Stock solutions of metal ions were prepared in acid-washed volumetric glassware, sterile-filtered, and stored in polypropylene containers. The concentrations and trace metal contamination levels of the various metal stocks were determined by inductively coupled plasma mass spectrometry (ICP-MS; see section below). For stock solutions of Fe(II), (NH<sub>4</sub>)<sub>2</sub>Fe(SO<sub>4</sub>)<sub>2</sub> · 6H<sub>2</sub>O powder was dissolved fresh in Milli-Q water immediately before the experiment. The sources of the metal stocks are reported in **Table S3**.

Protein concentrations were determined by A<sub>280</sub> absorbance measurements. These were taken using a BioTek Synergy HT Microplate Reader, outfitted with a BioTek Take3 Microvolume Plate (0.048-cm pathlength). The concentration of CP was calculated using an extinction coefficient ( $\epsilon$ ) of 18,450 M<sup>-1</sup> cm<sup>-1</sup>, while the concentration of dsICP was calculated using an extinction coefficient of 18,575 M<sup>-1</sup> cm<sup>-1</sup>. The concentrations of other proteins were calculated using the extinction coefficients reported in **Table S4**.

Cell optical densities (ODs) were determined using a Beckman Coulter DU800 Spectrophotometer, using polypropylene cuvettes with a 1-cm pathlength and monitoring absorbance at 600 nm.

All experiments were performed in triplicate using at least two independent batches of protein. In the case of dsICP, a batch was defined as the product of an individual oxidation reaction, even when multiple oxidations were performed using the same starting CP preparation.

### *Expression and Purification of Calprotectin (CP) and Variants*

CP, CP-Ser and CP-Ser<sup>I60E</sup> were expressed, purified and handled according to previously established protocols.<sup>S1,S2</sup> The preparation of dsICP is detailed below.

### *General Microbiology*

Luria broth (LB) and tryptic soy broth (TSB) were prepared according to vendor recommendations. Tris:TSB medium was prepared as a 62:38 v/v mixture of antimicrobial assay (AMA) buffer (20 mM Tris, 100 mM NaCl, pH 7.5) and TSB (with dextrose) and sterilized by passage through a 0.22- $\mu$ m filter. Immediately prior to use, the medium was supplemented with 2 mM Ca(II). Chemically defined medium (CDM) was prepared as previously described,<sup>S3</sup> and supplemented with 1 mM Ca(II), 0.3  $\mu$ M Mn(II), 0.1  $\mu$ M Cu(II), 0.1  $\mu$ M Ni(II), 5  $\mu$ M Fe(II), and 6  $\mu$ M Zn(II) before use. The bacterial strains listed in **Table S10** were streaked from freezer stocks onto LB agar plates and grown at 37 °C overnight (16–20 h). Overnight liquid cultures were prepared by inoculating 2 mL of LB medium in 14-mL polypropylene culture tubes with five individual colonies. Overnight cultures were incubated at 37 °C and 250 rpm for 12–16 h.

### *Western Blot Analysis of CP Subunits*

To detect S100A8 and S100A9 subunits by Western blotting, protein samples (~20  $\mu$ M) were mixed in equal parts with 2 $\times$  SDS-PAGE loading dye and heated for 5–7 min at 95 °C. For reduced control samples, the dye was supplemented with 2% v/v  $\beta$ -mercaptoethanol. 5–10  $\mu$ L of

each sample was loaded onto a 15% polyacrylamide gel (5% stacking layer) and run at 150 V until the dye front fully cleared the gel. The gel was removed from the casting apparatus and submerged in 1× Turbo buffer (48 mM Tris, 39 mM glycine, 1 g/L SDS, pH 9.2, 20% EtOH). After a 5-min equilibration period, the gel was transferred to a nitrocellulose membrane using a semi-dry transfer sandwich and a Bio-Rad Trans-Blot Turbo™ machine (11 min, 15 V). The membrane was blocked for 1 h at room temperature with 10 mL of 5% milk in TBS (20 mM Tris pH 7.5, 138 mM NaCl) + 0.01% NaN<sub>3</sub>. The membrane was quickly rinsed with 3 × 10 mL of Milli-Q water. Then, it was incubated overnight at 4 °C with 10 mL of a 1:250 dilution of α-S100A8 mAb (AlexaFluor® 680 conjugate, Santa Cruz Biotechnology Inc., #sc-48352 AF680) and a 1:1,000 dilution of α-S100A9 mAb (AlexaFluor® 790 conjugate, Santa Cruz Biotechnology Inc., #sc-376772 AF790) in 5% BSA (TBS) + 0.01% NaN<sub>3</sub>. In the morning, the membrane was brought to room temperature and was washed with 4 × 10 mL of TBS + 0.1% Tween-20 (10 min each). The membrane was rinsed twice with Milli-Q water and visualized using a LI-COR Odyssey DLX (700 nm and 800 nm channels).

#### *Inductively Coupled Plasma Mass Spectrometry (ICP-MS)*

The concentration of metal ions in either metal stock solutions or media was determined using an Agilent 7900 inductively coupled plasma mass spectrometer (ICP-MS). The instrument is located in the Center for Environmental Health Sciences Bioanalytical Core Facility at the Massachusetts Institute of Technology. The instrument was operated in Helium mode. Prior to each run, a series of standards were prepared using an environmental standard mixture containing 100 µg/mL of Ca, Fe, K, Mg and Na, and 10 µg/mL of Co, Cu, Mn, Ni and Zn (Agilent Technologies, #5183-4688). The mixture was diluted 1:10 → 1:100,000 in 10-fold serial dilutions, and standard curves plotted for each element. Included in the standards was a blank sample of 5% HNO<sub>3</sub> (ARISTAR® ULTRA, Ultrapure for trace metal analysis, VWR, #87003-228). All blanks and all samples were prepared in 3–5% HNO<sub>3</sub> in Milli-Q water, and supplemented with an internal standard of 1 ppb Tb (Agilent Technologies, #5190-8590). Samples were prepared in 5-mL

polypropylene tubes (VWR, #470225-028) and transferred to 2-mL PTFE ICP-MS sample cups (PerkinElmer Life Sciences, #B3001566) for analysis.

#### *Preparation of dsICP*

dsICP was prepared by thawing 20–30 mg of CP on ice over 1 h. The solution was brought up to 10 mL with buffer (20 mM HEPES pH 8.0 + 1 mM NaCl) and injected into a pre-hydrated Slide-A-Lyzer® cassette (3–12 mL, 10-kDa MWCO; Fisher Scientific, #66810) or tubing (Spectra/Por3 RC Dialysis Membrane Tubing, 3.5-kDa MWCO). The cassette/tubing was placed in 5 L of room-temperature buffer, freshly supplemented with 20–35  $\mu$ M H<sub>2</sub>O<sub>2</sub> (Millipore Sigma, #18304). After 4 h of gentle stirring and again after 8 h, the cassette/tubing was transferred to a new 5 L buffer solution, also freshly supplemented with H<sub>2</sub>O<sub>2</sub>. After a total of 24 h, the contents of the cassette/tubing were diluted to 30 mL with 20 mM Tris pH 9.5 (no salt). To remove precipitates and any contaminating bacteria, the sample was filtered through a 0.22- $\mu$ m cellulose acetate membrane (VWR, #76479-044). The sample was injected onto an anion exchange column (Capto™ HiRes Q 10/100, Cytiva, #29275881) connected to an ÄKTA FPLC system (UPC-10, Cytiva, #28406268). Following injection, the column was washed with 2 column volumes (CVs) of Buffer A (20 mM Tris pH 9.5 + 5 mM NaCl). Protein was eluted with a 10→30% gradient of Buffer B (20 mM Tris pH 9.5 + 1 M NaCl) over 15 CVs at 1 mL/min, with absorbance monitored at 280 nm. 20  $\mu$ L of each fraction were mixed 1:1 with 2 $\times$  SDS-PAGE loading dye (no reductant) and analyzed by SDS-PAGE. The fractions with the highest dsICP purity were combined and concentrated to ~2 mL using a 10-kDa MWCO spin concentrator (Millipore Sigma, #UFC801024). The solution was transferred to a pre-hydrated Slide-A-Lyzer® cassette (0.5–3 mL, 10-kDa MWCO; Fisher Scientific, #66380). The protein was dialyzed overnight in 1 L of storage buffer (20 mM HEPES pH 8.0 + 100 mM NaCl), supplemented with 10 g of Chelex®. In the morning, the sample was concentrated down to ~500  $\mu$ L, aliquoted, and flash-frozen. The aliquots were stored at –80 °C and thawed on ice prior to use. In some cases, aliquots were refrozen once, but never more than twice in total.

Protein concentration was determined using absorbance measurements as detailed under 'General Materials and Methods'. A typical preparation involved one to three parallel oxidation reactions, which were combined prior to the anion exchange step and purified using a corresponding number of injections. Yields for a given preparation ranged from 15% to 40%, with purities commonly exceeding 90% as determined by SDS-PAGE analysis.

#### *HPLC Analysis of CP Subunits and dsICP*

Samples of CP and dsICP were prepared for and analyzed by HPLC using an established protocol.<sup>S4</sup> 36  $\mu\text{L}$  of protein solution was mixed with 120  $\mu\text{L}$  of 6 M Guanidine HCl and 4  $\mu\text{L}$  of 6% v/v trifluoroacetic acid (TFA), then spun down at 13,000 rpm for 10 min. 120  $\mu\text{L}$  of supernatant were transferred to an HPLC vial and analyzed using an Agilent 1260 Infinity HPLC, equipped with a C4 reverse-phase column (Proto 300 C4, 5  $\mu\text{m}$  particle size, 300  $\text{\AA}$  pore size, 4.6 $\times$ 250 mm, Higgins Analytical Inc.) running at 1 mL/min. Gradient (A/B): 0.0 min, 10% B; 15.0 min, 40% B; 55.0 min, 45% B; 55.5 min, 100% B; 70.5 min, 100% B; 71.0 min, 10% B; 86.0 min, 10% B. Mobile phase A consisted of water + 0.1% (v/v) TFA, while mobile phase B consisted of acetonitrile + 0.1% (v/v) TFA. Acetonitrile and TFA were both purchased as HPLC-grade solvents (Sigma). The elution was monitored at 220 nm, with a 500 nm reference wavelength and 100 nm bandwidth. Under the specified gradient conditions, S100A8, S100A9, and dsICP eluted at approximately 33.0, 46.5, and 53.0 min, respectively. All integrations were performed using the instrument's built-in analysis software.

#### *Quadrupole Time-of-Flight (Q-TOF) Detection of CP Subunits and dsICP*

90  $\mu\text{L}$  of a 200- $\mu\text{M}$  solution of dsICP or CP was separated by reverse-phase HPLC using the method detailed above. Fractions corresponding to the main peaks were collected manually and lyophilized overnight. The dried fractions were each resuspended in 250  $\mu\text{L}$  of 50:50 ACN/H<sub>2</sub>O and pelleted at 13,000 rpm for 10 min. 175  $\mu\text{L}$  of supernatant were transferred to an MS vial. 5  $\mu\text{L}$  were injected onto an Agilent 6545 Q-TOF MS housed at the Massachusetts Institute

of Technology's Department of Chemistry Instrumentation Facility (DCIF), running in positive mode and equipped with an Agilent Poroshell StableBond C18 column (5  $\mu\text{m}$  particle size, 300  $\text{\AA}$  pore size, 2.1 $\times$ 75 mm) running at 0.3 mL/min. Gradient (A/B): 0 min, 10% B; 1 min, 10% B; 7 min, 50% B; 14 min, 80% B; 16 min, 95% B; 17 min, 95% B; 18 min, 10% B. Mobile phase A consisted of water + 0.1% (v/v) formic acid (FA), while mobile phase B consisted of acetonitrile + 0.1% (v/v) FA. Acetonitrile and FA were both purchased as HPLC-grade solvents (Sigma). The mass spectra obtained were deconvoluted using the Agilent MassHunter BioConfirm software.

#### *Tryptic MS Analysis of dsICP*

An aliquot of dsICP was thawed on ice and buffer exchanged into trypsin reaction buffer (50 mM ammonium bicarbonate, pH 8.0). A total of six buffer-exchange cycles were performed, each consisting of a 5-fold dilution. The protein was then diluted with trypsin reaction buffer to a final volume of 500  $\mu\text{L}$  and a final concentration of 30  $\mu\text{M}$ , and trypsin was added to a final concentration of 1  $\mu\text{M}$ . The reaction mixture was divided into two 250- $\mu\text{L}$  aliquots, each of which was incubated overnight at 37  $^{\circ}\text{C}$  and 200 rpm. After  $\sim$ 16 h, both reaction tubes were flash-frozen and lyophilized to remove ammonium bicarbonate.

One sample was resuspended in 200  $\mu\text{L}$  of water + 0.1% FA and pelleted (13,000  $\times$  g, 10 min). 125  $\mu\text{L}$  of supernatant was transferred to an MS vial. This sample corresponds to the no-TCEP condition.

The second sample was resuspended in 50  $\mu\text{L}$  of water, and TCEP was added to a final concentration of 4 mM (2  $\mu\text{L}$  of 0.1 M stock). The sample was incubated for 1 h at 37  $^{\circ}\text{C}$  and 200 rpm, diluted to 200  $\mu\text{L}$  with water, and supplemented with 0.1% TFA (0.8  $\mu\text{L}$  of 25% stock). As above, the sample was pelleted by centrifugation (13,000  $\times$  g, 10 min) and 125  $\mu\text{L}$  of supernatant was transferred to an MS vial. This sample corresponds to the +TCEP condition.

Both samples were analyzed by LC-QTOF MS using the protocol detailed in the preceding section. All data analysis was performed using the Agilent MassHunter Qualitative Analysis software.

### *Thiol Quantification Assay*

The number of free cysteine residues in CP and dsICP was measured using a protocol adapted from previous work.<sup>S5</sup> In short, a 4 mM solution of 2,2'-dithiodipyridine (DTDP) was prepared by dissolving DTDP in 1 M HCl and then diluting with water to the desired DTDP concentration. The solution was aliquoted and stored at  $-20\text{ }^{\circ}\text{C}$ . On the day of the experiment, a 3 mM solution of reduced glutathione (GSH) was made fresh in 10 mM HCl. The assay buffer (100 mM  $\text{NaH}_2\text{PO}_4$ , 200  $\mu\text{M}$  EDTA, pH 7.0) was degassed by bubbling  $\text{N}_2$  through for  $>1$  h prior to use.

Protein stocks were thawed on ice and buffer-exchanged into 20 mM NaOAc pH 5.0 using 10-kDa MWCO spin concentrators. A total of six buffer-exchange cycles were performed, each consisting of a 5-fold dilution. Protein solutions were kept on ice and used shortly thereafter.

A standard curve was generated by mixing 125  $\mu\text{L}$  of DTDP stock with either 0, 10, 20, 30, or 40  $\mu\text{L}$  of GSH stock and diluting to a final volume of 3 mL with assay buffer. The solutions were incubated at room temperature for 15 min, and the absorbance at 341 nm ( $A_{341}$ ) was recorded; the DTDP-only sample served as the blank.

Alongside the control samples, protein samples were diluted to 12.5  $\mu\text{M}$  with assay buffer to a final volume of 750  $\mu\text{L}$ , including 31.25  $\mu\text{L}$  of DTDP stock. Like the control samples, the solutions were incubated for 15 min at room temperature, and their  $A_{341}$  measured. The standard curve was used to determine the concentration of free thiols present in each protein sample.

### *Circular Dichroism (CD) Spectroscopy*

Samples for CD spectroscopy were prepared by buffer exchanging dsICP or CP into 1 mM Tris pH 7.5 using 10-kDa MWCO spin concentrators. The buffer for CP also contained 1 mM DTT. CD spectra were obtained on a Jasco J-1500 CD spectrometer, located in the Biophysical Instrumentation Facility at the Massachusetts Institute of Technology. Spectra were recorded at room temperature with a protein concentration of 10  $\mu\text{M}$  and using a CD cell from Hellma Analytics (1 mm pathlength). For samples containing Ca(II), 2 mM Ca(II) was added from a 50 mM stock

solution, and the solutions were incubated for at least 20 min prior to data collection. For thermal denaturation experiments, the same samples were heated with a ramp rate of 2 °C/min from 25 °C to 95 °C.

Thermal denaturation curves were fitted to a Boltzmann sigmoidal function with sloped baselines using GraphPad Prism 10 (Equation 1), such that  $m_f$  and  $m_u$  are the slopes of the folded and unfolded regions of the curve,  $b_f$  and  $b_u$  are the absorbances of the folded and unfolded protein,  $m$  is the slope of the transition,  $T_m$  is the melting temperature, and  $T$  is the temperature (independent variable). Selected apo dsICP replicates were averaged and fitted to a two-transition curve (Equation 2). The subscript numbers attached to the variables signify the transition;  $u_1$  is the first transition and  $u_2$  is the fully unfolded protein.

$$(1) \quad \frac{(m_f T + b_f) - (m_u T + b_u)}{1 + e^{\frac{T - T_m}{m}}} + (m_u T + b_u)$$

$$(2) \quad \frac{(m_f T + b_f) - (m_{u_1} T + b_{u_1})}{1 + e^{\frac{T - T_{m_1}}{m_1}}} + (m_{u_1} T + b_{u_1}) + \frac{(m_{u_2} T + b_{u_2}) * e^{\frac{T - T_{m_2}}{m_2}}}{1 + e^{\frac{T - T_{m_2}}{m_2}}}$$

### *Analytical Size Exclusion Chromatography (SEC)*

Methods for analytical SEC were adapted from a previously reported protocol.<sup>S1</sup> Experiments were carried out on an ÄKTA FPLC system equipped with a Superdex™ 75 10/300 GL SEC column at 4 °C. The column was equilibrated with running buffer (20 mM HEPES, 100 mM NaCl, pH 7.5) prior to each injection. The running buffer for the CP samples was supplemented with 5 mM DTT.

The column calibration was carried out by using a low molecular weight Gel Filtration Calibration Kit (Cytiva, #28403841). A 1-mg/mL solution of blue dextran was prepared for the dead volume determination. Following centrifugation for 10 min at 13,000 rpm and 4 °C, the sample was injected onto the column. For the injection, 500 µL of sample solution was loaded onto a 100-µL loop and injected with 500 µL of running buffer. The sample was eluted over 1 CV

with a flow rate of 0.3 mL/min. Using the same method, a cocktail of protein standards was injected in a separate run. The cocktail contained 3 mg/mL of aprotinin (6.5 kDa), ribonuclease A (13.7 kDa), carbonic anhydrase (29 kDa), and conalbumin (75 kDa), and 4 mg/mL of ovalbumin (43 kDa). A standard curve was prepared for molecular weight calculations.

For experiments involving the absence or presence of Ca(II) in the running buffer, protein was diluted to 100  $\mu$ M in buffer, which was supplemented with 0 mM or 2 mM Ca(II). Following a 15-min incubation in the respective buffer, the samples were injected onto the column. For the experiments involving a titration of varying Ca(II) concentrations, no Ca(II) was added to the running buffer. Instead, Ca(II) was added directly to the protein samples. The solutions, which contained 80  $\mu$ M protein, were incubated for 25 min at room temperature prior to injection.

For the sample injections, 200  $\mu$ L of sample solution was loaded onto a 100- $\mu$ L loop and injected with 500  $\mu$ L of running buffer. The sample was eluted over 1 CV with a flow rate of 0.3 mL/min.

### *Metal Depletion Assays*

The workflow for metal depletion was adapted from a reported protocol.<sup>S6</sup> A 5-mL aliquot of bacterial growth medium was supplemented with either buffer (no-protein control) or 15  $\mu$ M of dslCP, CP or CP-Ser. CDM was supplemented with 1 mM Ca(II), while Tris:TSB and Tris:YPD were supplemented with 2 mM Ca(II) to induce CP oligomerization. In the case of CP, 5 mM DTT was also added to the media to keep the protein reduced. The samples were incubated overnight at 30 °C and 150 rpm. Meanwhile, a set of twelve centrifugal PES spin concentrators (10-kDa MWCO, Pall Corporation, #MAP010C38) were washed with 2  $\times$  10 mL of 0.1 M EDTA pH 8.0 (1,000  $\times$  g, 10 min), followed by 10  $\times$  10 mL rinses with Milli-Q water (3,000  $\times$  g, 6 min). After 24 h, the samples were transferred to the EDTA-washed filters and concentrated down to <1 mL (4,000  $\times$  g, 30 min). 3  $\times$  4.03 mL of Milli-Q water were added to the retentate, which was spun down (4,000  $\times$  g, 30 min) after each addition. The combined flowthroughs (17.1 mL) were supplemented with 900  $\mu$ L of HNO<sub>3</sub> and 1 ppb Tb and analyzed by ICP-MS. In addition to the

twelve samples prepared as above, a no-filter control was prepared by mixing 5 mL of fresh media with 12.1 mL of Milli-Q water and adding HNO<sub>3</sub> and 1 ppb Tb as above.

#### *Antimicrobial (AMA) Assays*

AMA assay protocols were adapted from previously reported procedures.<sup>S7</sup> Briefly, subcultures were prepared as 1:100 dilutions of the bacterial overnight cultures into 2 mL of LB medium in 14-mL polypropylene culture tubes. The subcultures were grown to an OD<sub>600</sub> of ~0.6. The experimental media—Tris:TSB, Tris:YPD, and CDM—were inoculated with a 1:500 dilution of the subcultures. Each culture was treated with 10 μM dsICP, CP or CP-Ser that was buffer exchanged into AMA buffer using 10-kDa MWCO spin concentrators (Amicon). An equivalent volume of AMA buffer was added to the untreated controls, and the plates were sealed with a breathable seal (Breathe-Easy Sealing Membrane, Sigma). Bacterial growth was monitored over 18 h based on the absorbance at 600 nm in a 96-well plate using a BioTek LogPhase600 microbiology plate reader at 37 °C and 700 rpm. Growth was monitored for 6 biological replicates, each with 2–3 technical replicates.

In the case of *C. albicans*, LB agar plates were streaked with the glycerol stock and incubated at 37 °C overnight, then at room temperature for another 24 h to allow the colonies to reach a sufficient size for inoculation. Seed cultures were set up in the morning by transferring a single colony into 2 mL of YPD media using a sterile pipette tip, followed by shaking at 30 °C, 300 rpm for ~4 h until the OD<sub>600</sub> reached 0.6. The culture was then diluted 1:500 in Tris:YPD and used to set up AMA assays in the same manner as described above. The 96-well plates in the LP600 instrument were shaken at 37 °C and 800 rpm, and monitored over the course of 22 h.

#### *Chrome Azurol S (CAS) Assay*

Protein for the CAS assays was prepared by buffer exchanging dsICP, CP or CP-Ser into AMA buffer three times using 10-kDa MWCO spin concentrators (Amicon). Overnight cultures were diluted 1:100 into 14-mL polypropylene culture tubes containing 1.4 mL of CDM and 15 μM

protein or AMA buffer (untreated control). The cultures were incubated at 37 °C and 250 rpm for 8 h. The OD<sub>600</sub> was measured, and the cultures were spun at 4,000 rpm and 4 °C for 7 min. After the cells were spun down, the supernatants were stored in Eppendorf tubes at -20 °C.

The universal CAS assay was carried out on bacterial supernatants according to the original protocol<sup>S8</sup> with the modifications made by Alexander et al.<sup>S7,S9</sup> The CAS dye solution was prepared immediately before use by dissolving 10.9 mg of hexadecyltrimethylammonium bromide (HDTMA, Spectrum Chemical) in ~12.5 mL of Milli-Q water with heating at 37 °C. Separately, a FeCl<sub>3</sub> stock was prepared in an acid-washed volumetric flask by dissolving anhydrous FeCl<sub>3</sub> (trace metals basis) in water and HCl. The concentration of this stock solution was determined via ICP-MS, and the stock solution was subsequently diluted to 1 mM Fe, with a final HCl concentration of ~10 mM. A 750-μL aliquot of the 1 mM FeCl<sub>3</sub> stock solution was added to 3.75 mL of 2 mM Chrome Azurol S (MP Biomedicals). The mixture was slowly added to the HDTMA solution with stirring. Then, 25 mL of a 1 M MES buffer solution (pH 5.6, Millipore Sigma) was added slowly with stirring. The solution was transferred to an acid-washed volumetric flask and diluted with Milli-Q water to 50 mL. 5-sulfosalicylic acid (MP Biomedicals) was added as a solid to a final concentration of 4 mM, and the solution was filtered with a 0.22-μm filter. All solutions were kept at or above room temperature to avoid precipitation.

Prior to the assay, the supernatants were thawed, spun down at 13,000 rpm and 4 °C for 10 min, and warmed to room temperature. The CAS assay was conducted in a 96-well plate. Each well was filled with 10 μL of supernatant, 90 μL of 0.5 M MES buffer to dilute the supernatant, and 100 μL of CAS dye solution (for *S. aureus* supernatants, 20 μL of supernatant and 80 μL of buffer were used instead). The plates were incubated in the dark at 30 °C for 45 min. The absorbance at 630 nm was measured with a BioTek Synergy HT Microplate Reader. The siderophore content was determined with Equation 3:

$$(3) \quad (A_{reference} - A_{sample})/A_{reference}$$

... where  $A_{\text{reference}}$  is the  $A_{630}$  of replete CDM and  $A_{\text{sample}}$  is the  $A_{630}$  of the sample. The values were normalized to the cell content by multiplying each value by 10 to account for the supernatant dilution (or 5 for *S. aureus*) and dividing the calculated value by the  $OD_{600}$  of the cultures.

*E. coli* CFT073 demonstrated variable growth across biological replicates upon treatment with 15  $\mu\text{M}$  dsICP, CP or CP-Ser. Hence, only the biological replicates with considerable growth, or an  $OD_{600} > 1$ , across all treatment conditions were used for analysis. Moreover, supernatants from this strain demonstrated minor precipitation (as determined by a higher  $A_{850}$  value than other samples), but its influence on the absorbance was negligible relative to the differences in  $A_{630}$  values between treated and untreated cultures.

### *Protease Susceptibility Assays*

Protease susceptibility assays were adapted from a previous protocol.<sup>S10</sup> To monitor susceptibility to HNE, stock solutions of dsICP, CP-Ser and CP-Ser<sup>I60E</sup> were diluted to 30  $\mu\text{M}$  in 1 $\times$  buffer (75 mM HEPES pH 7.5, 100 mM NaCl, 3 mM  $\text{CaCl}_2$ ) and incubated for 1 h at 37  $^\circ\text{C}$ , 175 rpm to allow for self-association. Samples were supplemented with 30  $\mu\text{M}$   $\text{MnCl}_2$  (1 equiv) as needed. After the incubation period, 36  $\mu\text{L}$  of the mixture were prepared for HPLC. The remaining volume was split into 36- $\mu\text{L}$  aliquots, supplemented with 2.5  $\mu\text{M}$  human neutrophil elastase (HNE; Fisher Scientific, #IHUELASD100UG), and incubated at 37  $^\circ\text{C}$ , 175 rpm. After 15 min, 30 min, 1 h, 2 h, 4 h and 6 h, one aliquot was removed from the incubator. Samples were prepared for and analyzed by HPLC as detailed under '*HPLC Analysis of CP Subunits and dsICP*'.

Reactions with trypsin were performed the same way, except that the protein was treated with 1  $\mu\text{M}$  trypsin (Affymetrix, #22725).

### *SV-AUC Analysis of dsICP and CP-Ser*

SV-AUC analysis was carried out using a reported protocol with modifications.<sup>S10</sup> Protein samples (27.5  $\mu\text{M}$ ) were prepared in metal-free 75 mM HEPES pH 7.5, 100 mM NaCl and supplemented with either: (1) 1.35 mM EDTA ("apo"); (2) 20 equiv Ca(II) (550  $\mu\text{M}$ ); (3) 2 mM

Ca(II) (physiological concentration); or (4) 20 equiv Ca(II) (550  $\mu\text{M}$ ) + 1 equiv Mn(II) (27.5  $\mu\text{M}$ ). After a 30-min wait to allow for oligomerization, the samples were flash-frozen with liquid nitrogen and stored at  $-80\text{ }^{\circ}\text{C}$  until the day of the analysis.

Sedimentation velocity analytical ultracentrifugation (SV-AUC) experiments were performed at  $20\text{ }^{\circ}\text{C}$  using an Optima analytical ultracentrifuge (Beckman Coulter, Brea, CA) equipped with a TiAn50 rotor. The instrument is housed at the Johnson Foundation Biophysical and Structural Biology Core Facility (University of Pennsylvania, Philadelphia PA). Samples were loaded into two-channel, charcoal-filled Epon centerpieces with sapphire windows, and data were collected using both absorbance and interference optics. Samples were thawed on wet ice and loaded into leak-tested SV-AUC cells. Loaded cells were allowed to equilibrate in the instrument under a temperature of  $20\text{ }^{\circ}\text{C}$  and full vacuum for 1 h before experiments were initiated. Sedimentation velocity centrifugation was performed at 40,000 rpm and  $20\text{ }^{\circ}\text{C}$ . Refractive index and absorbance data (260, 280 nm) were collected simultaneously every 30 seconds to record the radial concentration as a function of time until all the sedimenting components cleared the optical path ( $\sim 6\text{ h}$ ).

Data were fitted using the  $c(S)$  and  $c(S, f/f_0)$  implementations of the Lamm equation as implemented in the program SEDFIT version 17. The partial specific volume ( $\bar{v}$ ), solvent density ( $\rho$ ), and viscosity ( $\eta$ ) were derived from chemical composition by SEDNTERP. Sedimentation coefficients were corrected for  $S_{20,w}$ .

#### *Midpoint Potential ( $E_m$ ) Determination of dsICP*

The midpoint potential of dsICP was determined using a protocol adapted from previously reported methods.<sup>S11,S12</sup> Protein was thawed on ice over 1 h, purged with Argon gas, and transferred to a wet anaerobic chamber (Vacuum Atmospheres Co., Hawthorne CA). Separately, DTT<sub>red</sub> and DTT<sub>ox</sub> powders were also transferred to the chamber and resuspended in degassed Milli-Q water to form 1 mM and 150 mM stocks, respectively. Protein was diluted to 20  $\mu\text{M}$  using buffer (75 mM HEPES, 100 mM NaCl, pH 7.00  $\pm$  3 mM CaCl<sub>2</sub>), and supplemented with

DTT<sub>red</sub>/DTT<sub>ox</sub>. The concentrations of the two redox components varied based on the desired voltage, with their sum fixed at 100 mM (see Supplementary Discussion). The reaction tubes (20  $\mu$ L) were placed inside a sealed glass chamber saturated with water, and incubated for 24 h at 37 °C inside the glovebox. After the incubation period, 5  $\mu$ L of 310 mg/mL N-ethylmaleimide in DMSO were added to each tube, followed by vortexing and a 10-min incubation period. The samples were removed from the glovebox and mixed with 25  $\mu$ L of 2 $\times$  SDS-PAGE loading dye, then heated for 5–7 min at 95 °C. 5  $\mu$ L of each sample were run on a polyacrylamide gel (5% stacking, 15% resolving) and stained with Coomassie dye. The destained gels were visualized using an Alphamager HP system (Cell Biosciences).

#### *Thioredoxin Susceptibility Assays*

The protocol to assess the thioredoxin susceptibility of dsICP was adapted from a prior report.<sup>S11</sup> In short, a 20- $\mu$ M solution of dsICP was incubated in reaction buffer (75 mM HEPES, 100 mM NaCl, pH 7.00) in the presence of  $\pm$  2 mM CaCl<sub>2</sub> and  $\pm$  1 equiv MnCl<sub>2</sub> / 1.9 equiv ZnSO<sub>4</sub>. 1.9 equiv of Zn(II) were used instead of the stoichiometric 2 equiv to avoid having free Zn(II) in solution due to any error in concentration or pipetting, which could potentially poison the selenocysteine-containing active site of TrxR.<sup>S13–S15</sup> After 1 h at room temperature, 20  $\mu$ L of sample were set aside as the 0 h timepoint. Then, the reaction mix was supplemented with 2.5  $\mu$ M human thioredoxin (Sigma Aldrich, #T8690), 0.05  $\mu$ M rat liver thioredoxin reductase (Sigma Aldrich, #T9698) and 2.5 mM NADPH (Sigma Aldrich, #481973). The reaction was quickly split into 20- $\mu$ L aliquots. The aliquots were kept at room temperature and quenched after the appropriate times. Samples were quenched via addition of 2.22  $\mu$ L of 100 mM N-ethylmaleimide in DMSO (made fresh from powder on the day of use), followed by vortexing and incubation at room temperature for 10 min.

For HPLC analysis, samples were diluted to 36  $\mu$ L with water, followed by a similar treatment and analysis workflow to the HNE samples. In the case where the sample was reduced prior to HPLC analysis, the 36- $\mu$ L sample was mixed with 120  $\mu$ L of 20 mM Tris pH 7.0 + 6 M

Guanidine HCl + 50 mM TCEP and heated at 95 °C for 10 min. Upon cooling to room temperature, the TFA was added.

For the purposes of Western blot analysis, samples were mixed with 22.22  $\mu$ L of 2 $\times$  SDS-PAGE loading dye (no reductant), and analyzed as described in a prior methods section.

## Supplementary Discussion

### *Determining the Midpoint Potential by Fitting to Nernst-Type Models*

The midpoint potential ( $E_m$ ) of a disulfide bond describes the voltage at which the concentrations of oxidized and reduced forms are equal ( $[\text{red}] = [\text{ox}]$ ). The voltage established by a redox pair is described by the Nernst equation:

$$E = E^{\circ'} - \frac{RT}{nF} \ln \frac{[\text{Red}]}{[\text{Ox}]} \quad (4)$$

For a DTT<sub>ox</sub>/DTT<sub>red</sub> redox pair at pH 7.00 and 37 °C:  $E^{\circ'} = -0.330 \text{ V}$ ,<sup>1</sup>  $R = 8.314 \text{ J K}^{-1} \text{ mol}^{-1}$ ,  $T = 310.15 \text{ K}$  and  $F = 96485 \text{ C mol}^{-1} \text{ e}^{-1}$ . This results in the following Nernst equation describing the concentrations of reduced and oxidized species:

$$E = -0.330 - \frac{0.0267267}{n} \ln \frac{[\text{Red}]}{[\text{Ox}]} \quad (5)$$

Now, for a DTT<sub>ox</sub>/DTT<sub>red</sub> redox pair,  $n = 2$ . This leads to the following equation:

$$E = -0.330 - 0.013363 \ln \frac{[\text{Red}]}{[\text{Ox}]} \quad (6)$$

If we let the independent variable  $X$  be the solution potential (mV) computed from the DTT<sub>ox</sub>/DTT<sub>red</sub> ratio and the dependent variable  $Y$  describe the % of oxidized species, we can rearrange Equation 6 to:

$$Y = \frac{100}{1 + \exp\left(-\frac{2}{26.7267} (X - E_m)\right)} = \frac{100}{1 + \exp\left(-\frac{X - E_m}{13.363}\right)} \quad (7)$$

A single-parameter fit (variable  $E_m$ ) of the experimental % HD5<sub>ox</sub> data is shown in Figure **S38A–B**. Clearly, the fit displays a slope that is too shallow. This is because, in reality,  $n$  might differ from 2 owing to competing factors such as steric considerations, parallel microstates, or kinetic trapping.

In response, we can keep  $n$  as a variable, and if we let  $Y = \% \text{ HD5}_{\text{ox}}$  and  $X = \text{solution mV}$  as before, we can rearrange Equation 5 to:

---

<sup>1</sup> This is usually reported for the standard state of 25 °C. The temperature dependence of  $E^{\circ'}$  is small, so assuming the 25 °C value at 37 °C is a reasonable approximation.

$$Y = \frac{100}{1 + \exp\left(-\frac{n}{26.7267}(X - E_m)\right)} \quad (8)$$

A two-parameter fit (variables  $n$  and  $E_m$ ) of the experimental % HD5<sub>ox</sub> data is shown in **Figure S38C–D**. The fit is much improved, but still relies on the assumption that the system reaches equilibrium at both high and low redox potentials relative to the  $E_m$ . In reality, our system only reaches ~80% HD5<sub>ox</sub> at high mV values relative to the  $E_m$ . To address this, the Nernst equation (5) can be rewritten as:

$$Y = Y_{\min} + \frac{Y_{\max} - Y_{\min}}{1 + \exp\left(-\frac{2h}{26.7267}(X - E_m)\right)} \quad (9)$$

... where  $n$  is replaced by the assumption of a  $2e^-$  reaction with a “Hill-like” steepness factor,  $h$ , and  $Y_{\min}$  and  $Y_{\max}$  are now stated explicitly. Using this equation, we can fit  $h$ ,  $E_m$ ,  $Y_{\min}$  and  $Y_{\max}$ , as was done in prior work on S100A7  $E_m$  determination.<sup>S11</sup> The results of the fit are shown in **Figure 8B** of the main text and are much more representative of the dataset. **Tables S14–S15** report the results of the various fits.

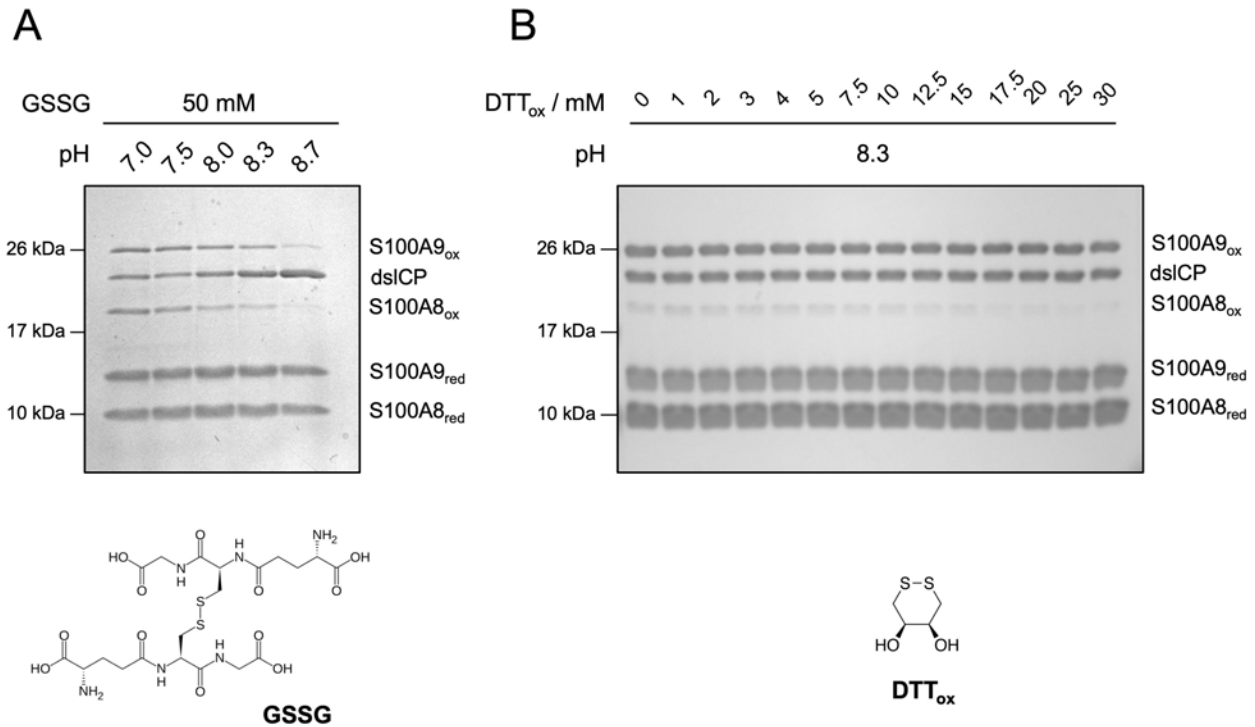

**Figure S1.** Prolonged incubation of CP with (A) GSSG or (B) DTT<sub>ox</sub> results in little or no formation of disulfide-linked CP (dsICP), respectively. (A) CP (1 mg/mL) was incubated with GSSG (50 mM) for 72 h at room temperature at the indicated pH values in buffer containing 100 mM Tris and 200 mM NaCl (pH 7.0–8.7). (B) CP (1 mg/mL) was incubated with DTT<sub>ox</sub> (0–30 mM) for 24 h at room temperature in buffer containing 100 mM Tris and 200 mM NaCl (pH 8.3). The chemical structure of each oxidizing compound is shown below its corresponding panel.

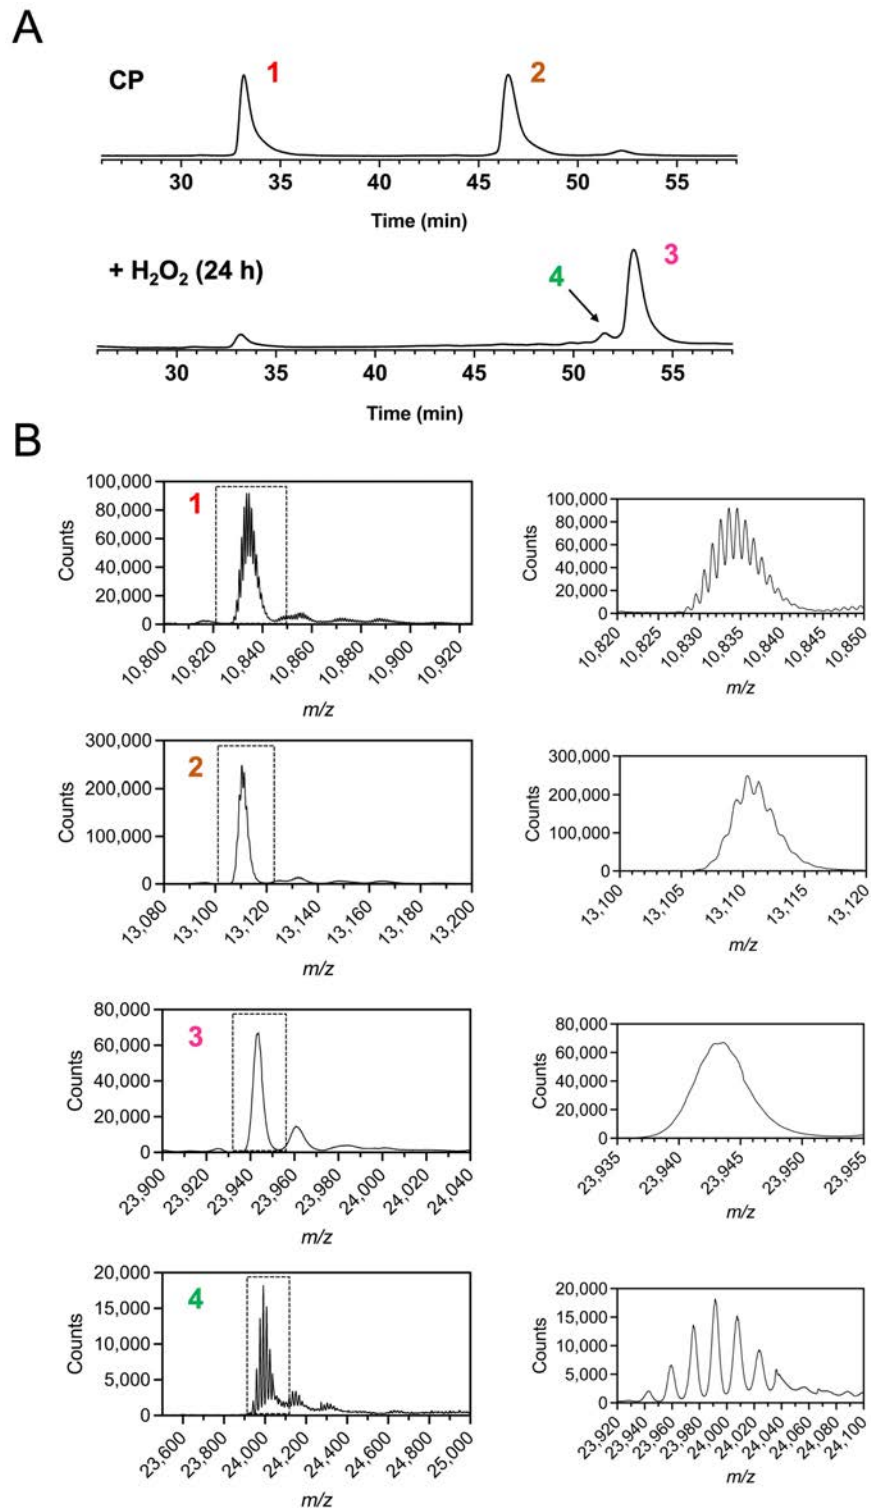

**Figure S2.** Q-TOF-MS detection of CP, dsICP and dsICP-MetO. (A) HPLC chromatograms of CP starting material, and CP + 100  $\mu$ M H<sub>2</sub>O<sub>2</sub> after 24 h. Peaks are labeled #1–4. (B) LC-Q-TOF-MS spectra of peaks labeled in A, with zoomed-in sections shown right. Peak 4 corresponds to dsICP-MetO, eluting earlier than dsICP and containing 1–6 oxidized methionines. See **Table S5**.

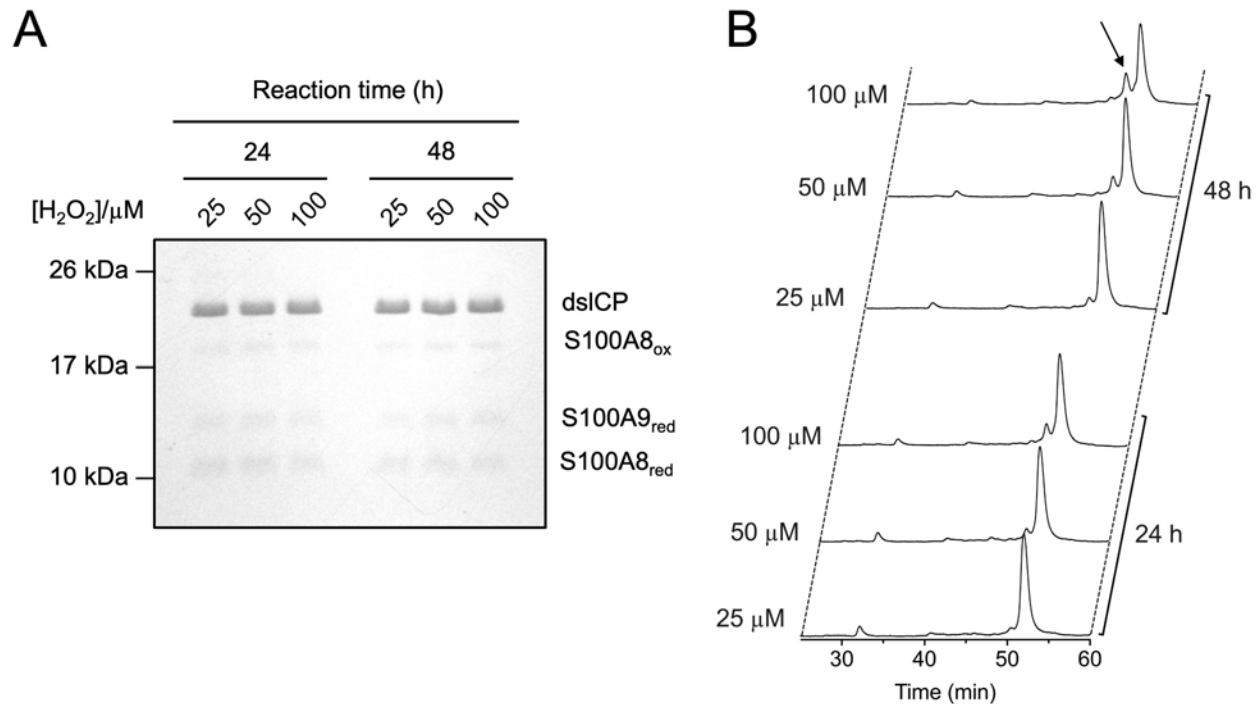

**Figure S3.** Optimized oxidation conditions for dsICP formation showing that 25  $\mu$ M H<sub>2</sub>O<sub>2</sub> leads to minimal methionine oxidation. (A) SDS-PAGE gel of 24- and 48-h reaction timepoints of CP in the presence of 25, 50 and 100  $\mu$ M H<sub>2</sub>O<sub>2</sub>. The dsICP band intensity and migration pattern appear unchanged across H<sub>2</sub>O<sub>2</sub> concentrations, thereby masking underlying differences in methionine oxidation. (B) HPLC chromatograms of the reactions from part A. A clear dsICP-MetO shoulder peak becomes visible with [H<sub>2</sub>O<sub>2</sub>] > 25  $\mu$ M and longer reaction times (see arrow).

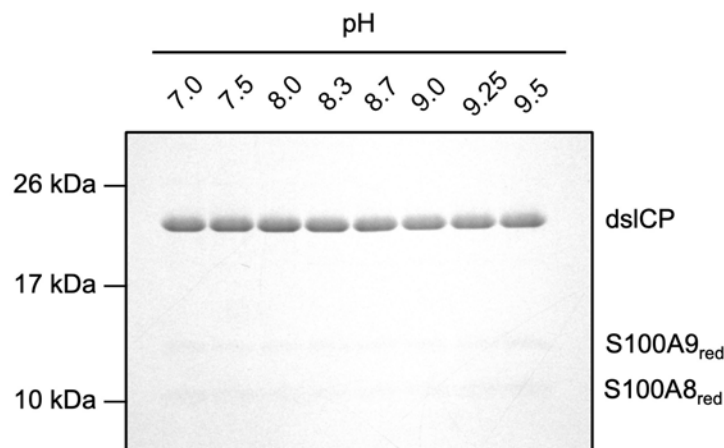

**Figure S4.** Oxidation of CP to dsICP is not pH-dependent between pH 7.0 and 9.5. CP (40  $\mu$ M) was incubated with 100  $\mu$ M  $H_2O_2$  in 100 mM Tris buffer (pH 7.0–9.5) containing 200 mM NaCl. After 48 h, samples were analyzed by SDS-PAGE, revealing comparable formation of dsICP across all conditions.

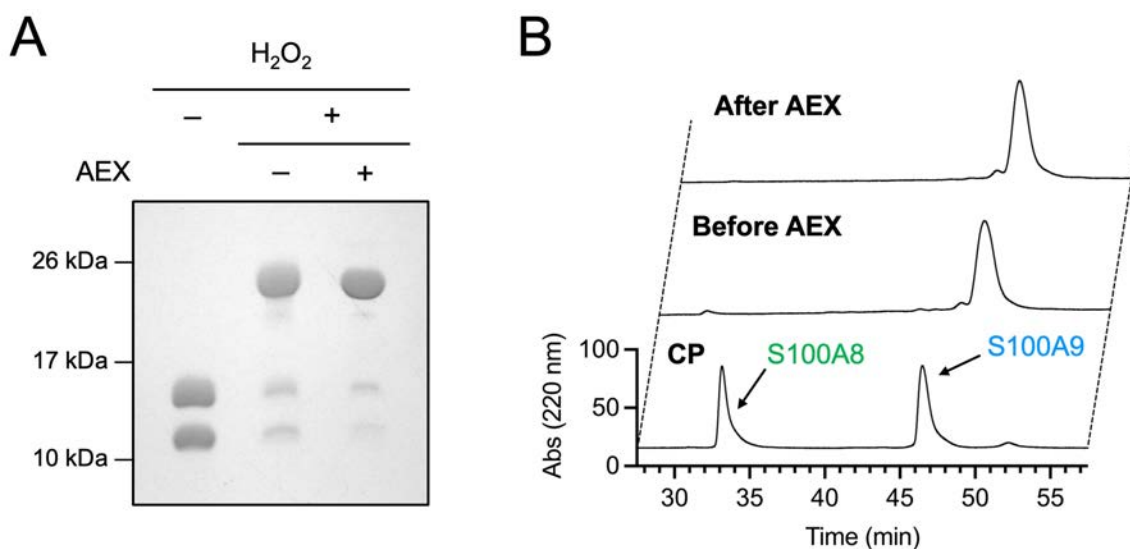

**Figure S5.** Anion exchange chromatography of the dsICP preparation. (A) SDS-PAGE analysis of CP starting material along with  $H_2O_2$  reaction mixture prior to and following anion exchange chromatography (AEX). CP was incubated in the presence of 25  $\mu$ M  $H_2O_2$  for 24 h in 20 mM HEPES pH 8.0, 1 mM NaCl. (B) Associated HPLC chromatograms. S100A8 and S100A9 peaks are indicated.



**A**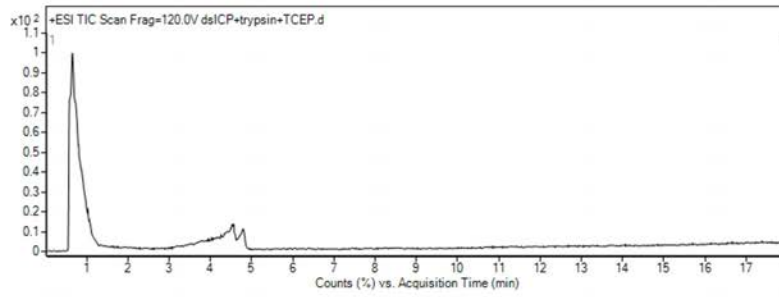**B**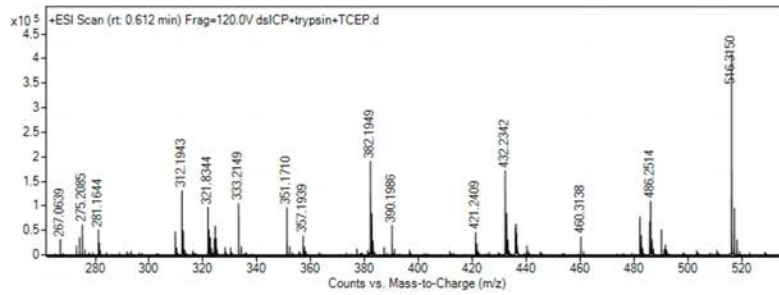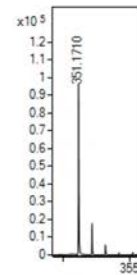**C**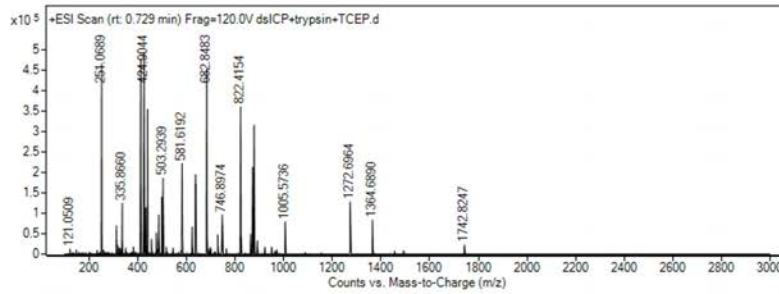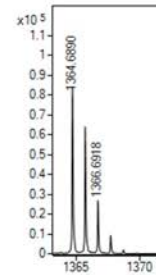**D**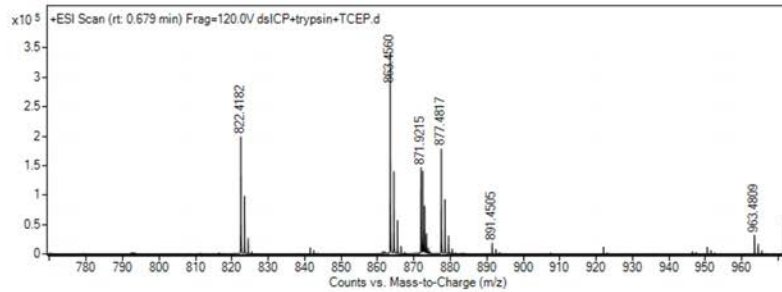**E**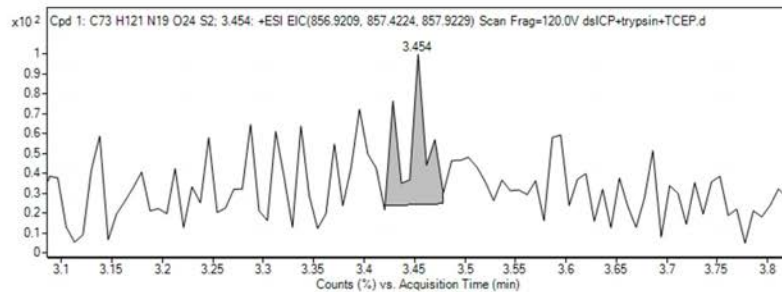

**Figure S7.** Analysis of TCEP-treated dslCP tryptic digestion products. (A) Total ion chromatogram (TIC) of the TCEP-treated tryptic digest. (B) MS spectrum at 0.612 min, showing the presence of multiple species including an ion at  $m/z$  351.1710, corresponding to the TCK peptide. A close-up of this ion and its isotopic pattern is shown on the right. (C) MS spectrum at 0.729 min, showing the presence of multiple species including an ion at  $m/z$  1364.6890, corresponding to the LLETECPQYIR peptide. A close-up of this ion and its isotopic pattern is shown on the right. (D) MS spectrum at 0.679 min, the retention time at which the disulfide-linked LLETECPQYIR–TCK tryptic product elutes in the non-reduced sample and is detected as the 2+ ion (**Figure S8**). No peak around  $m/z$  ~856.92 is visible here. (E) Supporting the observation in panel D, the extracted ion chromatogram shows no detectable presence of a species with the disulfide-linked peptide's molecular formula. Theoretical and observed  $m/z$  values for the tryptic peptides analyzed in panels B–E are reported in **Table S7**.

---

**A**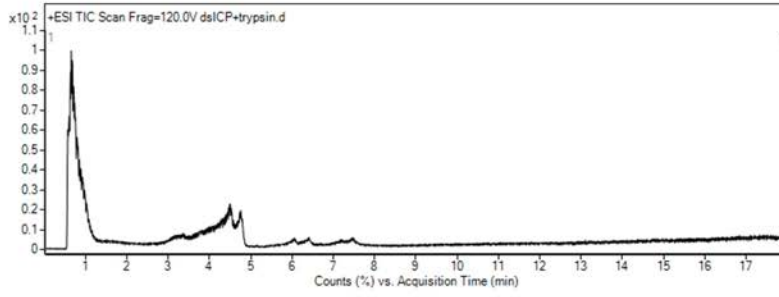**B**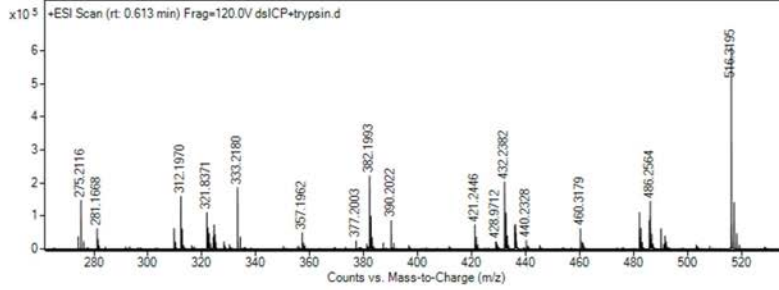**C**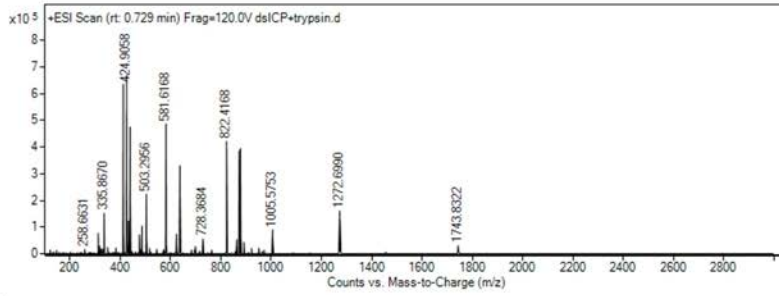**D**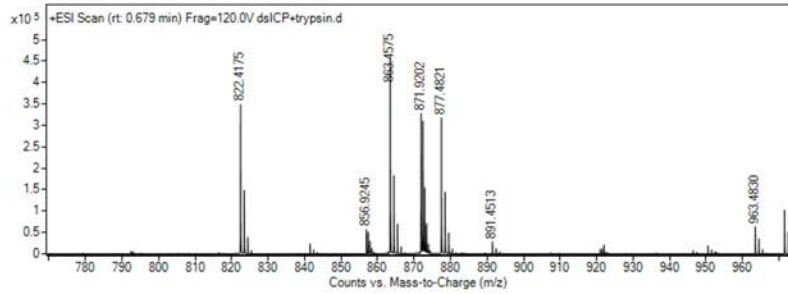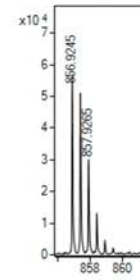**E**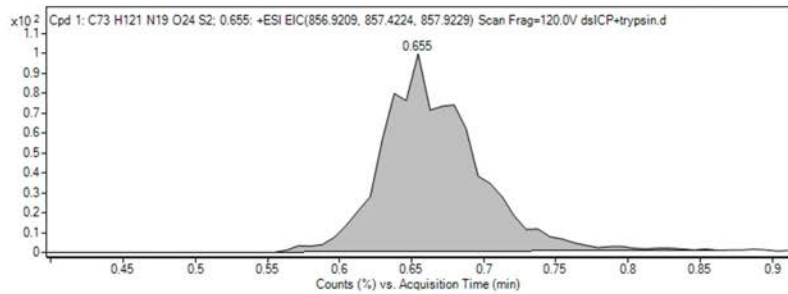

**Figure S8.** Analysis of dsICP tryptic digestion products (no reductant added). (A) Total ion chromatogram (TIC) of the tryptic digest. (B) MS spectrum at 0.612 min, the retention time at which the TCK tryptic product elutes in the reduced sample (**Figure S7**). No peak at  $m/z \sim 351.17$  is visible here. (C) MS spectrum at 0.729 min, the retention time at which the LLETECPQYIR tryptic product elutes in the reduced sample (**Figure S7**). No peak at  $m/z \sim 1364.69$  is visible here. (D) MS spectrum at 0.679 min, showing the presence of multiple species including an ion at  $m/z$  856.9245, corresponding to the disulfide-linked LLETECPQYIR–TCK tryptic product, detected as the 2+ ion. A close-up of this ion and its isotopic pattern is shown on the right. (E) The extracted ion chromatogram (EIC) for the  $m/z$  856.9210 (2+) species demonstrates the presence of the disulfide-linked LLETECPQYIR–TCK product observed in panel D, with a peak elution time around 0.655 min post-injection. Theoretical and observed  $m/z$  values for the tryptic peptides analyzed in panels B–E are reported in **Table S7**.

---

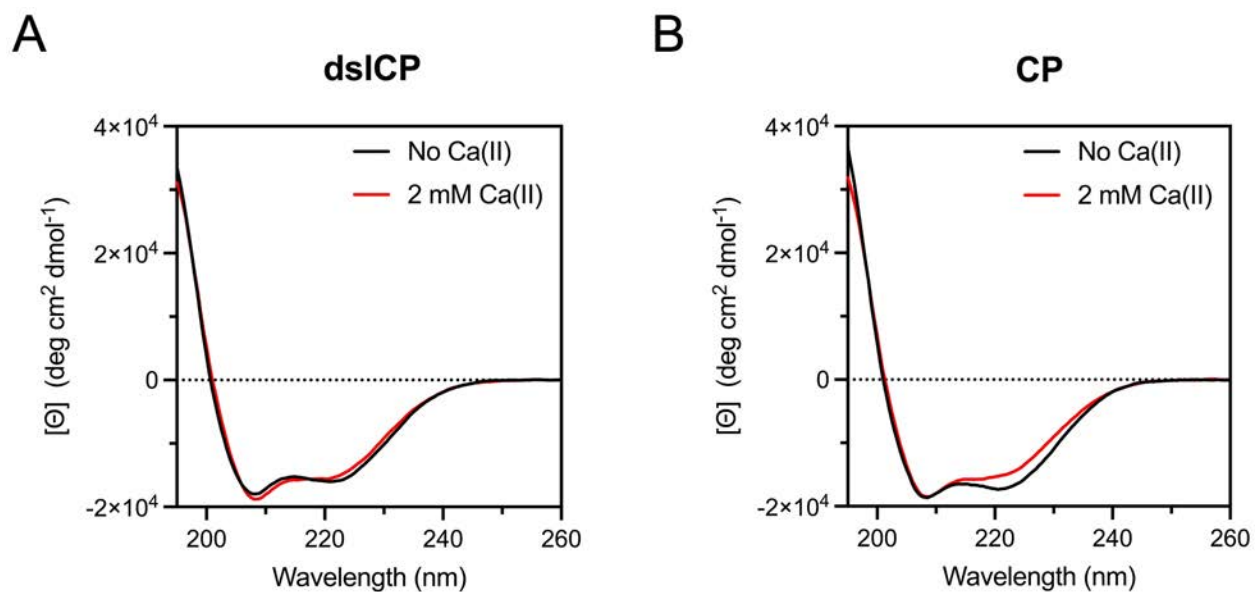

**Figure S9.** dsICP and CP exhibit similar  $\alpha$ -helical content in the absence and presence of Ca(II). CD spectra of 10  $\mu\text{M}$  (A) dsICP and (B) CP in the absence and presence of 2 mM Ca(II) are shown.

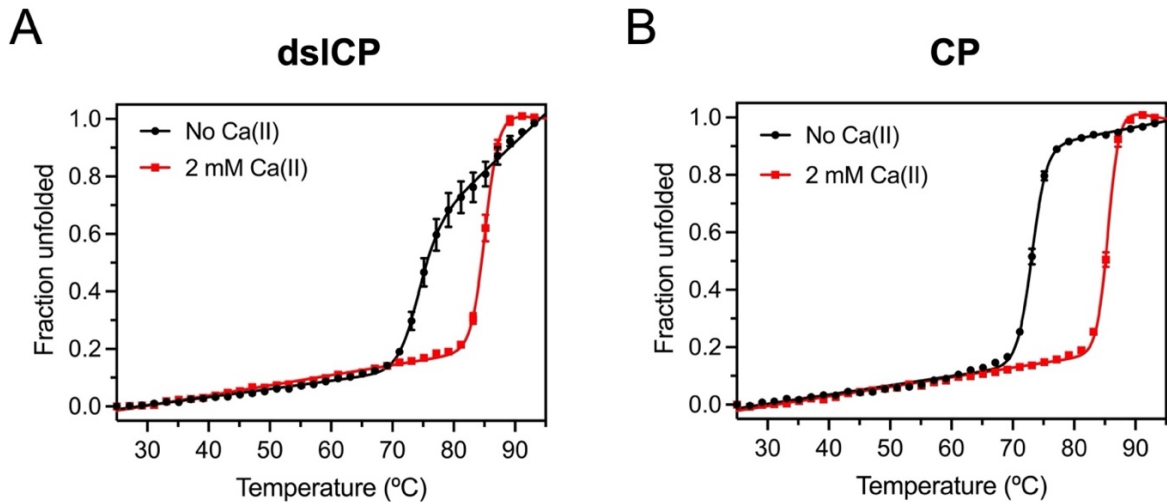

**Figure S10.** dsICP and CP display increased thermal stabilities in the presence of 2 mM Ca(II). Thermal denaturation curves for (A) dsICP and (B) CP were recorded by monitoring the absorption at 222 nm for 10  $\mu$ M protein in 1 mM Tris pH 7.5 buffer with a 2- $^{\circ}$ C/min ramp rate. Values are reported as mean  $\pm$  s.e.m.;  $n = 3$ , except for dsICP -Ca(II), for which  $n = 10$ . The data points were fitted to a single-transition Boltzmann sigmoidal model (see Equation 1 in the Methods section), shown as a solid line. The averaged data for apo dsICP in panel A correspond to the averaged data from the 10 replicates shown in **Figure S11**.

**A**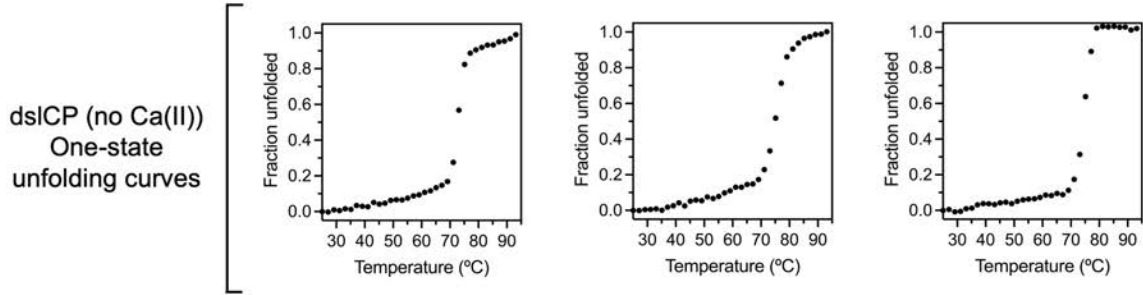**B**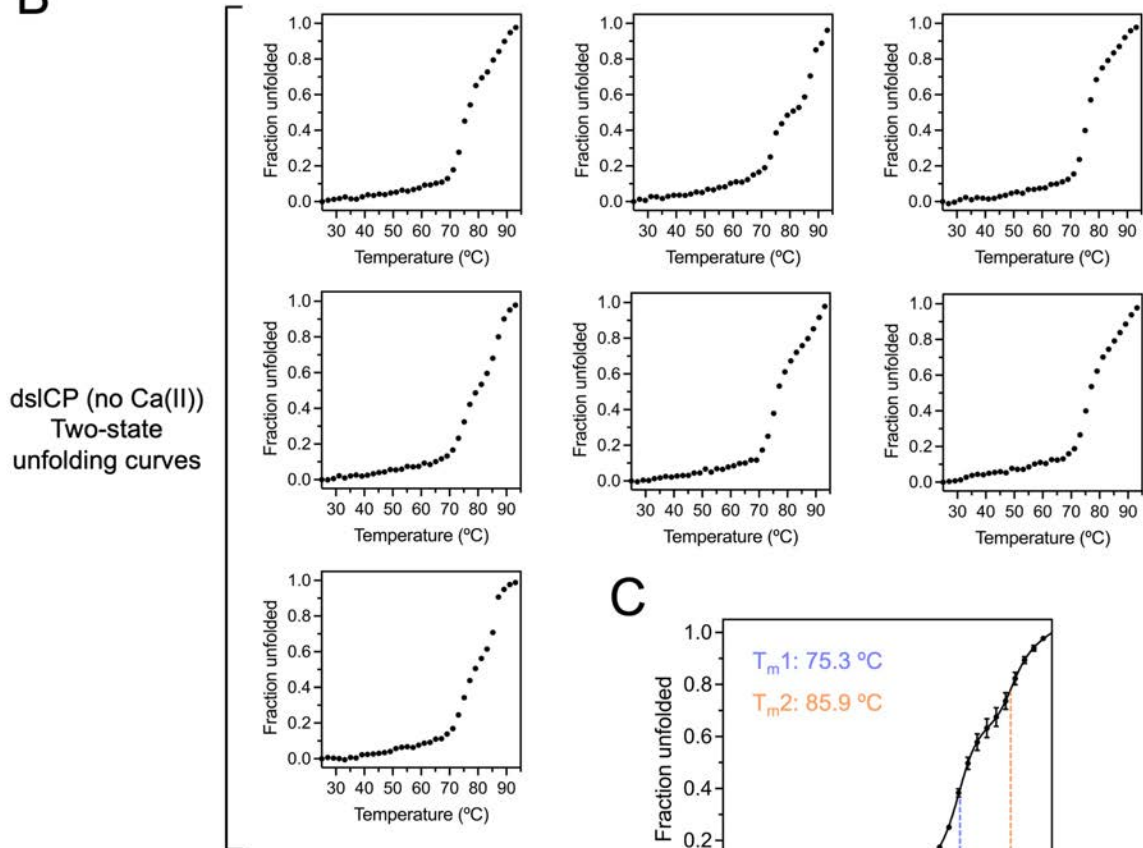**C**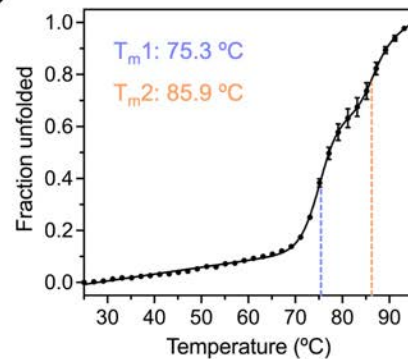

**Figure S11.** Ten independent replicates of dsICP thermal denaturation in the absence of added Ca(II). (A) The top three replicates display what appears to be a single melting transition, whereas (B) the bottom seven exhibit a non-singular transition. Thermal denaturation curves were recorded by monitoring the absorption at 222 nm for 10  $\mu\text{M}$  protein in 1 mM Tris pH 7.5 buffer with a 2- $^{\circ}\text{C}/\text{min}$  ramp rate. (C) The seven replicates with non-singular transitions were averaged, and values are reported as mean  $\pm$  s.e.m. ( $n = 7$ ). The data points were fitted to a two-transition Boltzmann sigmoidal model (see Equation 2 in the Methods section), shown as a solid line. The extracted  $T_m$  values are reported on the plot.

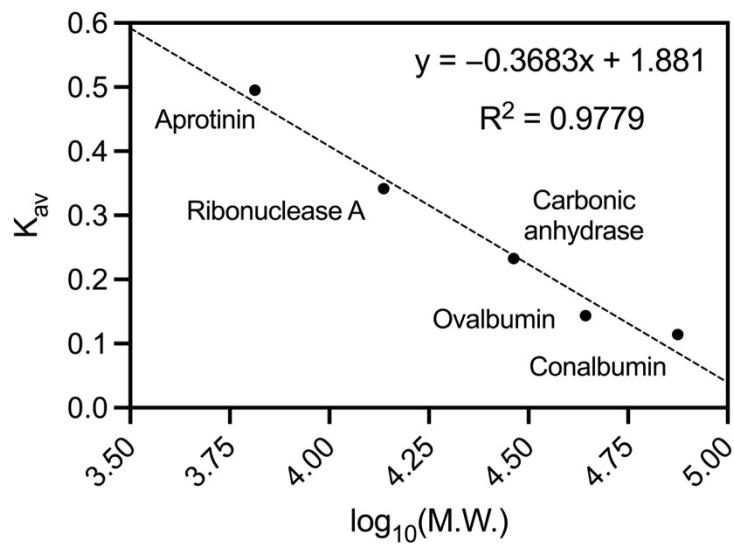

**Figure S12.** Standard curve for SEC molecular weight calculations. Proteins used for the standard curve are indicated on the plot. Aprotinin: 6.5 kDa, ribonuclease A: 13.7 kDa, carbonic anhydrase: 29 kDa, ovalbumin: 43 kDa, conalbumin: 75 kDa.

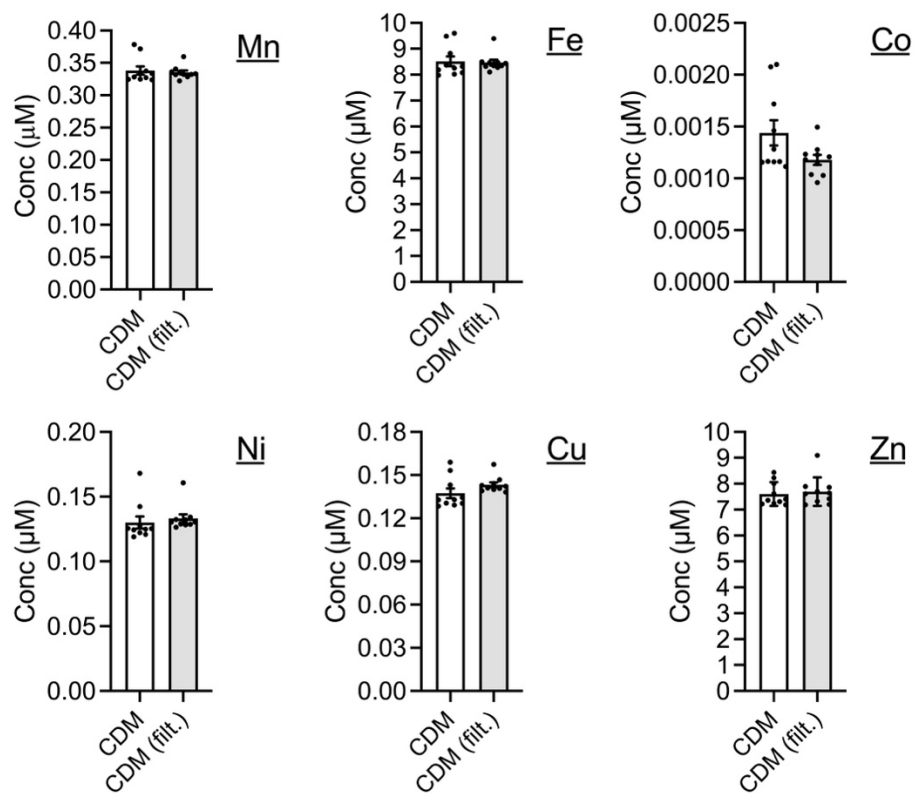

**Figure S13.** Metal content of filtered and unfiltered CDM corresponding to the metal-depletion experiment in **Figure 4** (main text). CDM was incubated for 24 h at 30 °C with shaking (150 rpm) in the absence of protein. Metal content was quantified by ICP-MS either directly or following filtration through a 10-kDa molecular weight cutoff filter. All values are reported as mean  $\pm$  s.e.m.;  $n = 10$  for all samples.

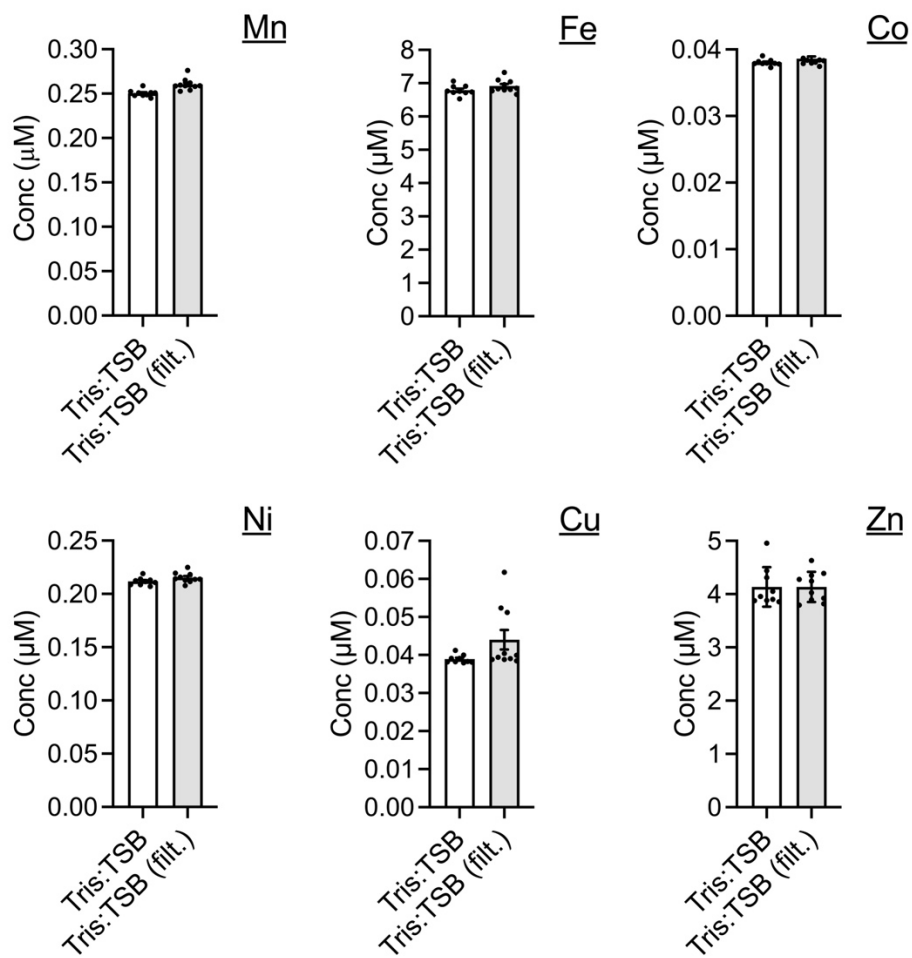

**Figure S14.** Metal content of filtered and unfiltered Tris:TSB corresponding to the metal-depletion experiment in **Figure 4** (main text). Tris:TSB was incubated for 24 h at 30 °C with shaking (150 rpm) in the absence of protein. Metal content was quantified by ICP-MS either directly or following filtration through a 10-kDa molecular weight cutoff filter. All values are reported as mean  $\pm$  s.e.m.;  $n = 10$  for all samples.

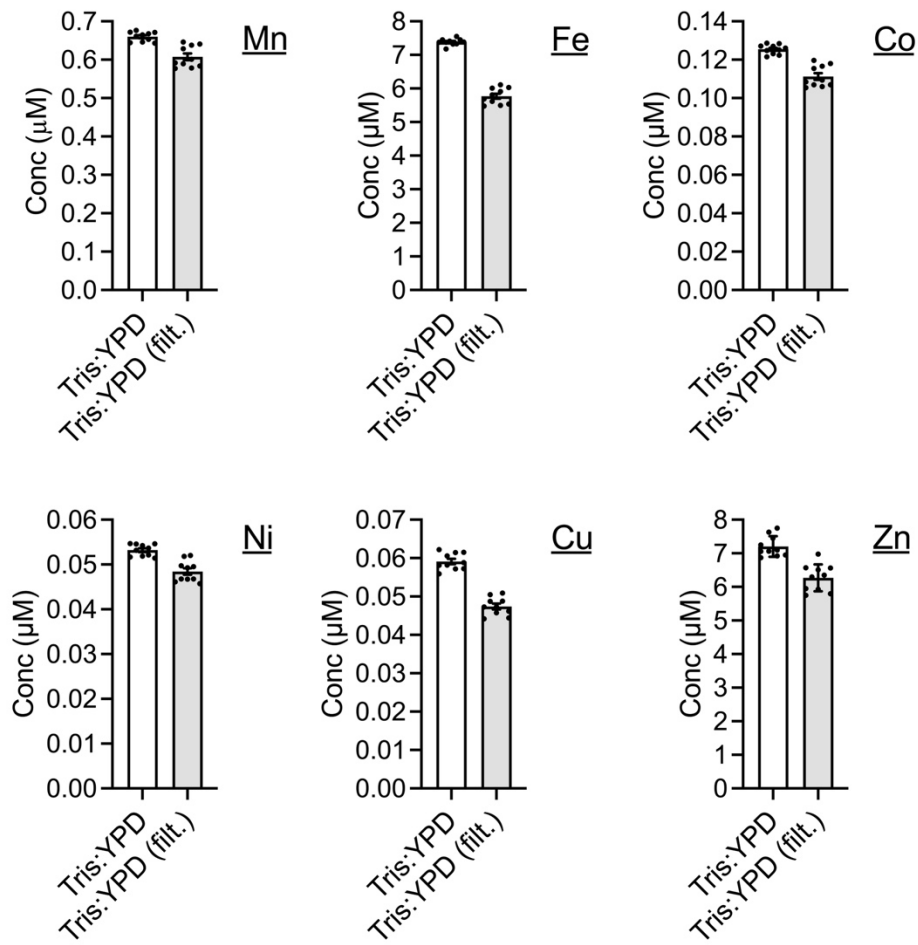

**Figure S15.** Metal content of filtered and unfiltered Tris:YPD corresponding to the metal-depletion experiment in **Figure 4** (main text). Tris:YPD was incubated for 24 h at 30 °C with shaking (150 rpm) in the absence of protein. Metal content was quantified by ICP-MS either directly or following filtration through a 10-kDa molecular weight cutoff filter. All values are reported as mean  $\pm$  s.e.m.;  $n = 10$  for all samples.

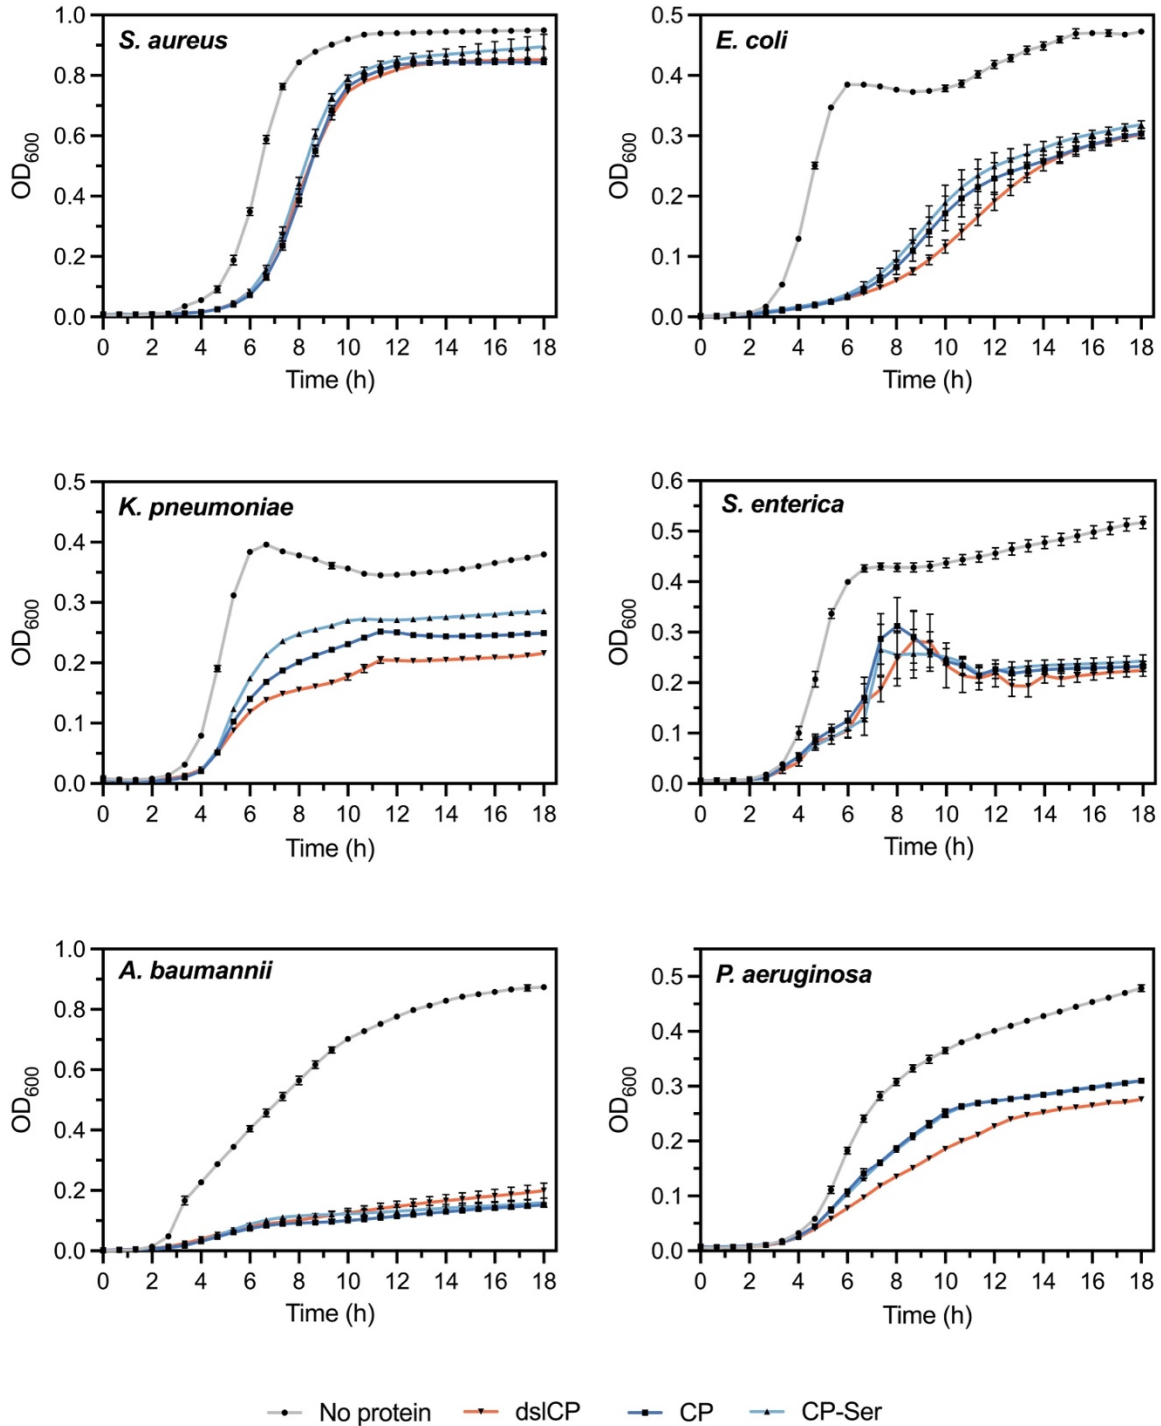

**Figure S16.** Antimicrobial activity of dsICP, CP and CP-Ser against *S. aureus* USA300 JE2, *E. coli* CFT073, *K. pneumoniae* ATCC 13883, *S. enterica* IR715, *A. baumannii* ATCC 17978 and *P. aeruginosa* PA14 grown in CDM. The medium was supplemented with  $\pm 10 \mu\text{M}$  protein and growth was monitored over 18 h at 37 °C and 700 rpm in a 96-well plate, with OD<sub>600</sub> measurements every 40 min. Curves represent the mean of 6 biological replicates (each the average of 3 technical replicates); error bars indicate s.e.m. across biological replicates (for *S. enterica*,  $n = 9$ ).

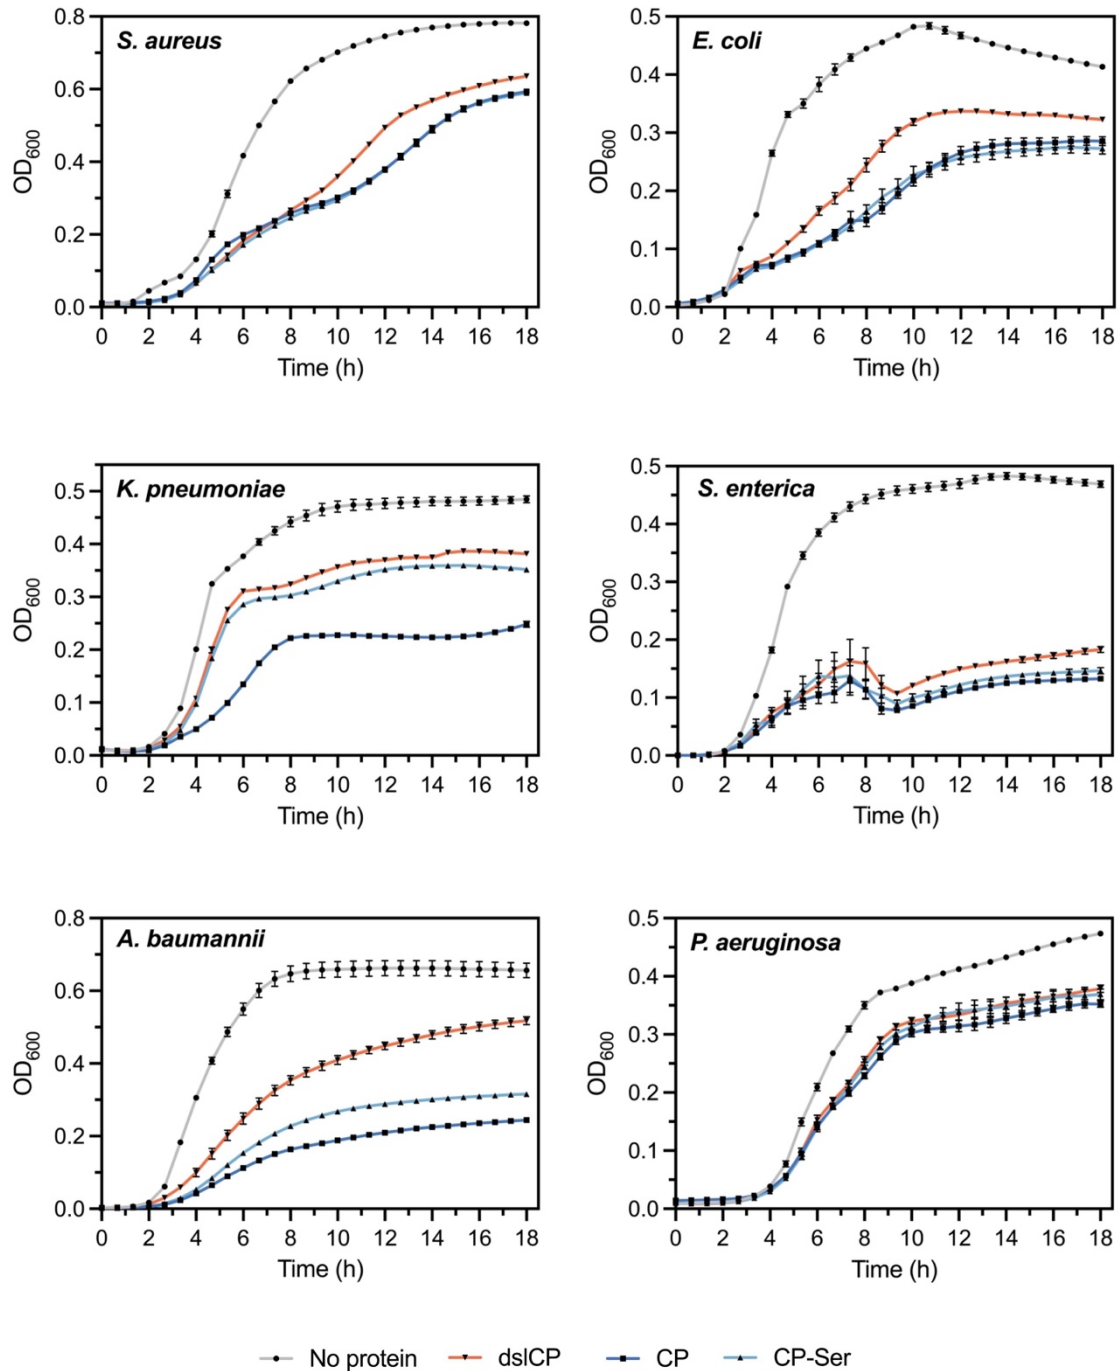

**Figure S17.** Antimicrobial activity of dsICP, CP and CP-Ser against *S. aureus* USA300 JE2, *E. coli* CFT073, *K. pneumoniae* ATCC 13883, *S. enterica* IR715, *A. baumannii* ATCC 17978 and *P. aeruginosa* PA14 grown in Tris:TSB. The medium was supplemented with  $\pm 10 \mu\text{M}$  protein and growth was monitored over 18 h at 37 °C and 700 rpm in a 96-well plate, with OD<sub>600</sub> measurements every 40 min. Curves represent the mean of 6 biological replicates (each the average of 3 technical replicates); error bars indicate s.e.m. across biological replicates (for *S. enterica*,  $n = 9$ ).

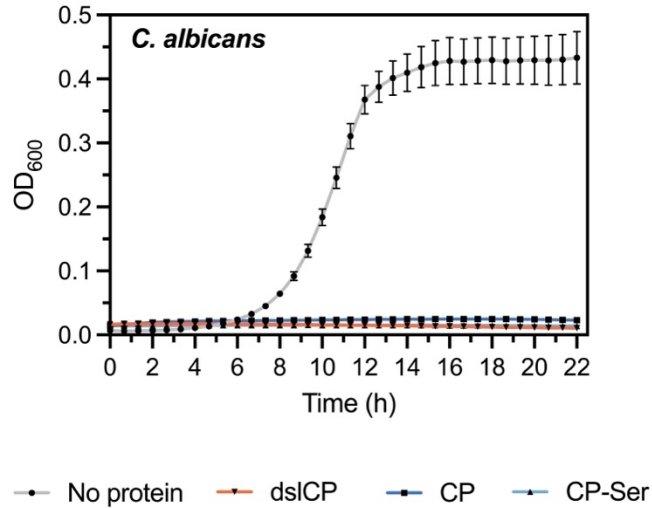

**Figure S18.** Antimicrobial activity of dsICP, CP and CP-Ser against *C. albicans* SC5314 grown in Tris:YPD. The medium was supplemented with  $\pm 10 \mu\text{M}$  protein and growth was monitored over 22 h at 37 °C and 800 rpm in a 96-well plate, with OD<sub>600</sub> measurements every 40 min. Curves represent the mean of 6 biological replicates (each the average of 3 technical replicates); error bars indicate s.e.m. across biological replicates.

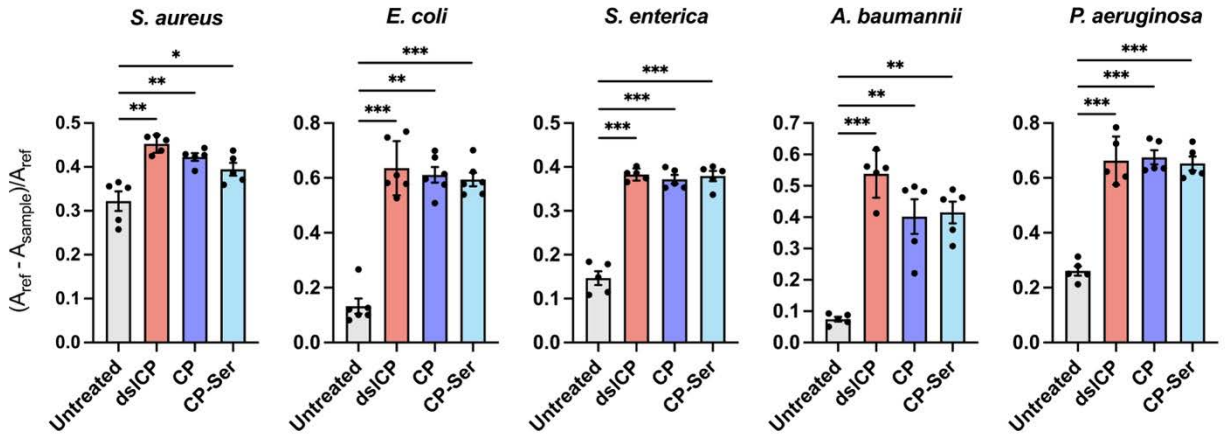

**Figure S19.** Unnormalized siderophore content of bacterial supernatants following 8 h of growth at 37 °C in CDM with dsICP, CP or CP-Ser treatment.  $A_{ref}$  is the reference containing only medium and dye solution and  $A_{sample}$  is the absorbance of the sample at 630 nm. The unnormalized values are based solely on the plate readouts; see the Methods section for details on the dilutions used for each organism and the normalization method used for the figure in the main text. All values are reported as mean  $\pm$  s.e.m.;  $n = 5$  for all samples except *E. coli* ( $n = 6$ ). Statistical significance was assessed by pairwise comparisons (Welch's two-sample  $t$ -test) between each individual treatment group and the untreated control. No statistical comparisons were made between different protein treatment groups. \*  $p < 0.05$ , \*\*  $p < 0.01$ , \*\*\*  $p < 0.001$ .

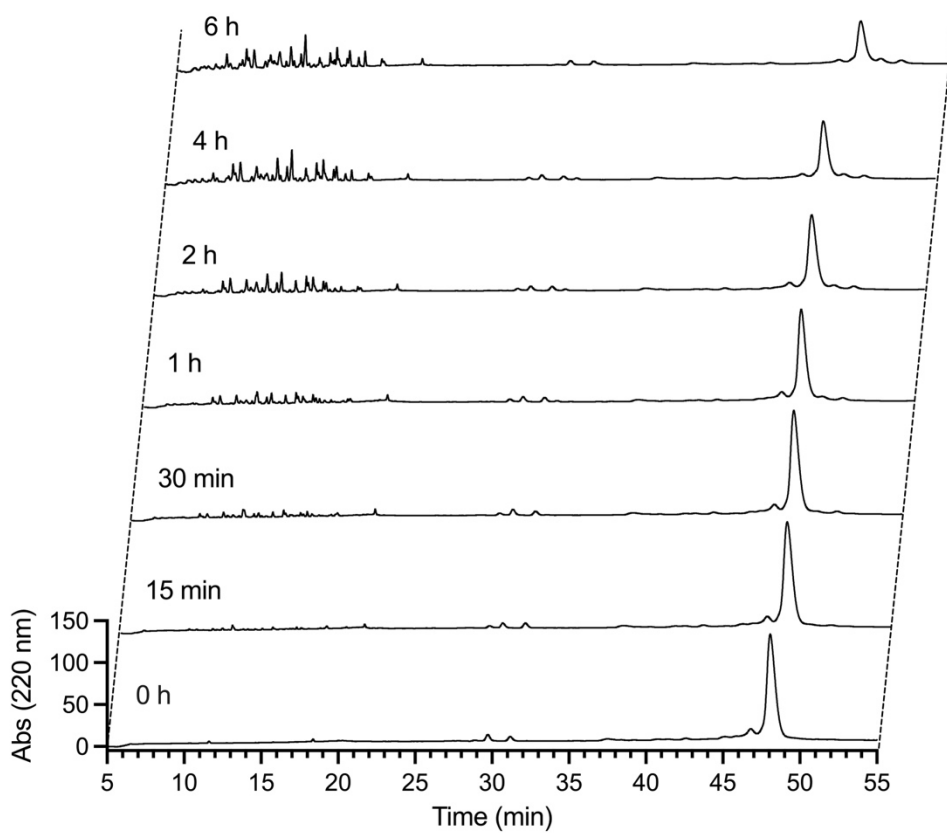

**Figure S20.** Representative full HPLC time-course stack plot for dsICP (30  $\mu$ M) treated with 2.5  $\mu$ M HNE for 0–6 h in the presence of 3 mM Ca(II).

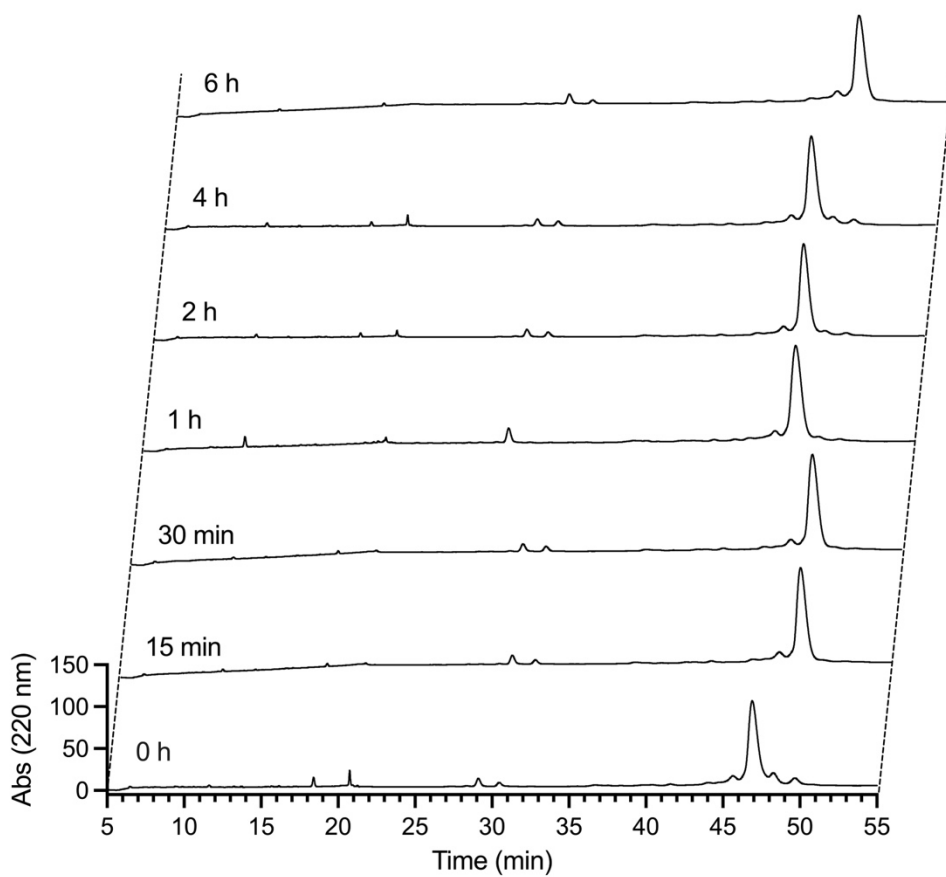

**Figure S21.** Representative full HPLC time-course stack plot for dsICP (30  $\mu$ M) treated with 2.5  $\mu$ M HNE for 0–6 h in the presence of 3 mM Ca(II) and 1 equiv Mn(II).

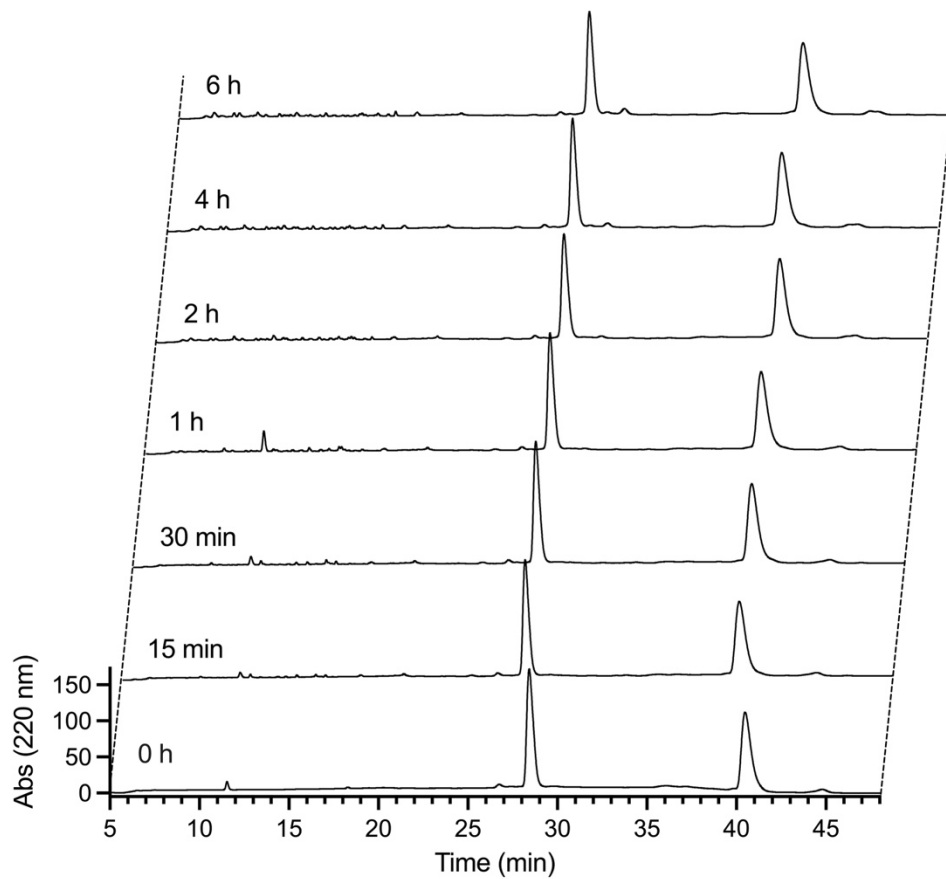

**Figure S22.** Representative full HPLC time-course stack plot for CP-Ser (30  $\mu\text{M}$ ) treated with 2.5  $\mu\text{M}$  HNE for 0–6 h in the presence of 3 mM Ca(II).

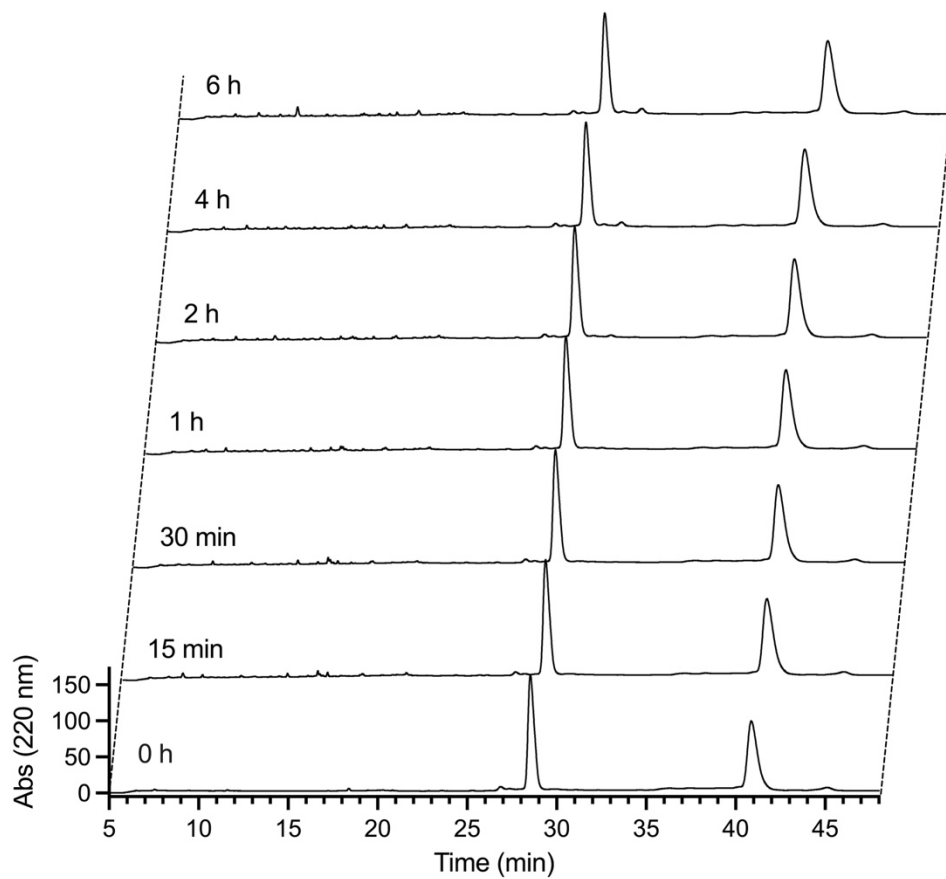

**Figure S23.** Representative full HPLC time-course stack plot for CP-Ser (30  $\mu$ M) treated with 2.5  $\mu$ M HNE for 0–6 h in the presence of 3 mM Ca(II) and 1 equiv Mn(II).

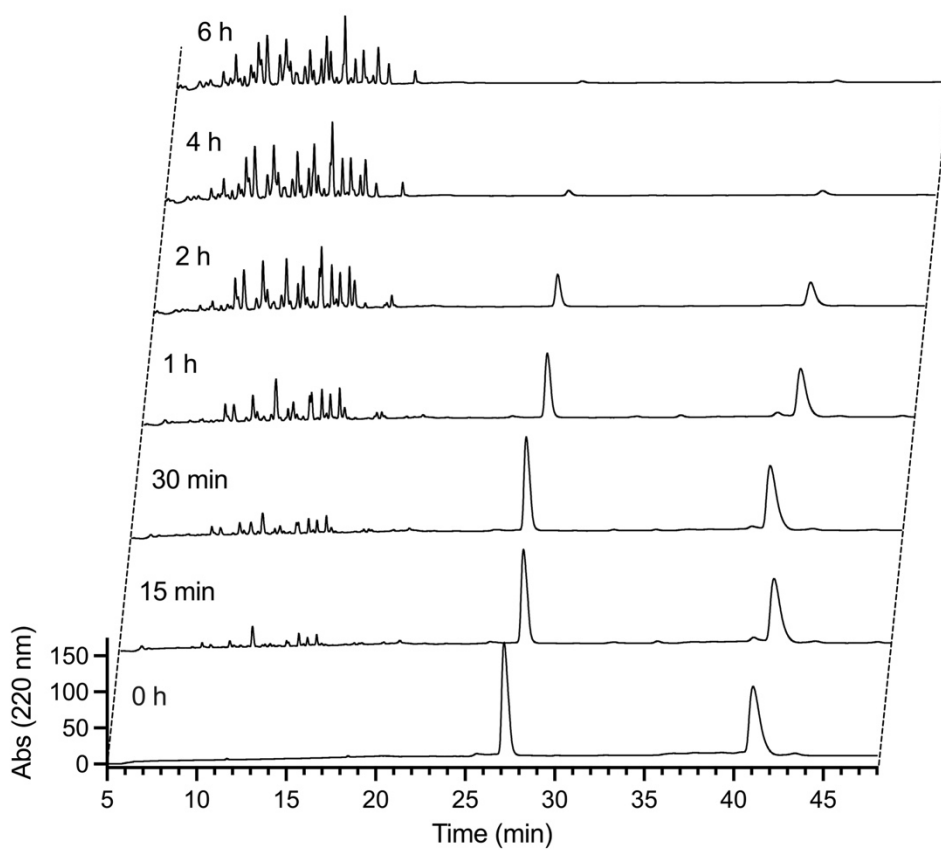

**Figure S24.** Representative full HPLC time-course stack plot for CP-Ser<sup>I60E</sup> (30  $\mu$ M) treated with 2.5  $\mu$ M HNE for 0–6 h in the presence of 3 mM Ca(II).

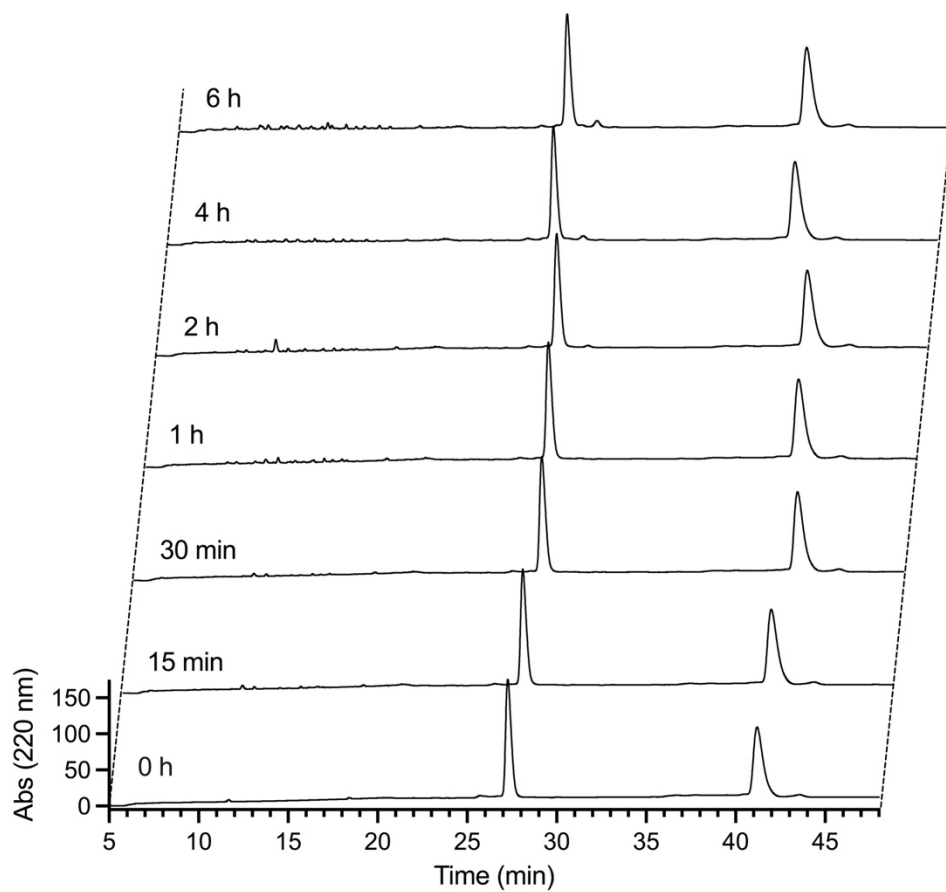

**Figure S25.** Representative full HPLC time-course stack plot for CP-Ser<sup>I60E</sup> (30  $\mu$ M) treated with 2.5  $\mu$ M HNE for 0–6 h in the presence of 3 mM Ca(II) and 1 equiv Mn(II).

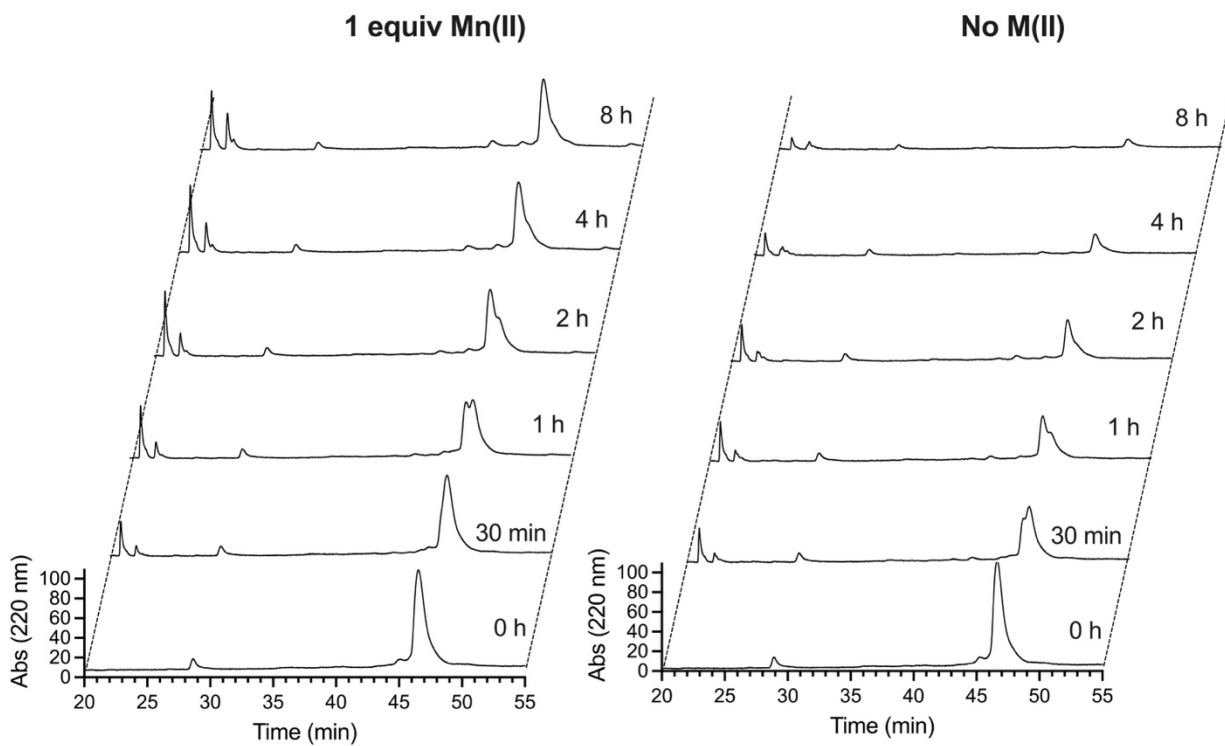

**Figure S26.** Representative full HPLC time-course stack plots for dsICP (30  $\mu$ M) treated with 1  $\mu$ M trypsin for 0–8 h in the presence (left) and absence (right) of 1 equiv Mn(II), with 3 mM Ca(II) present in all samples.

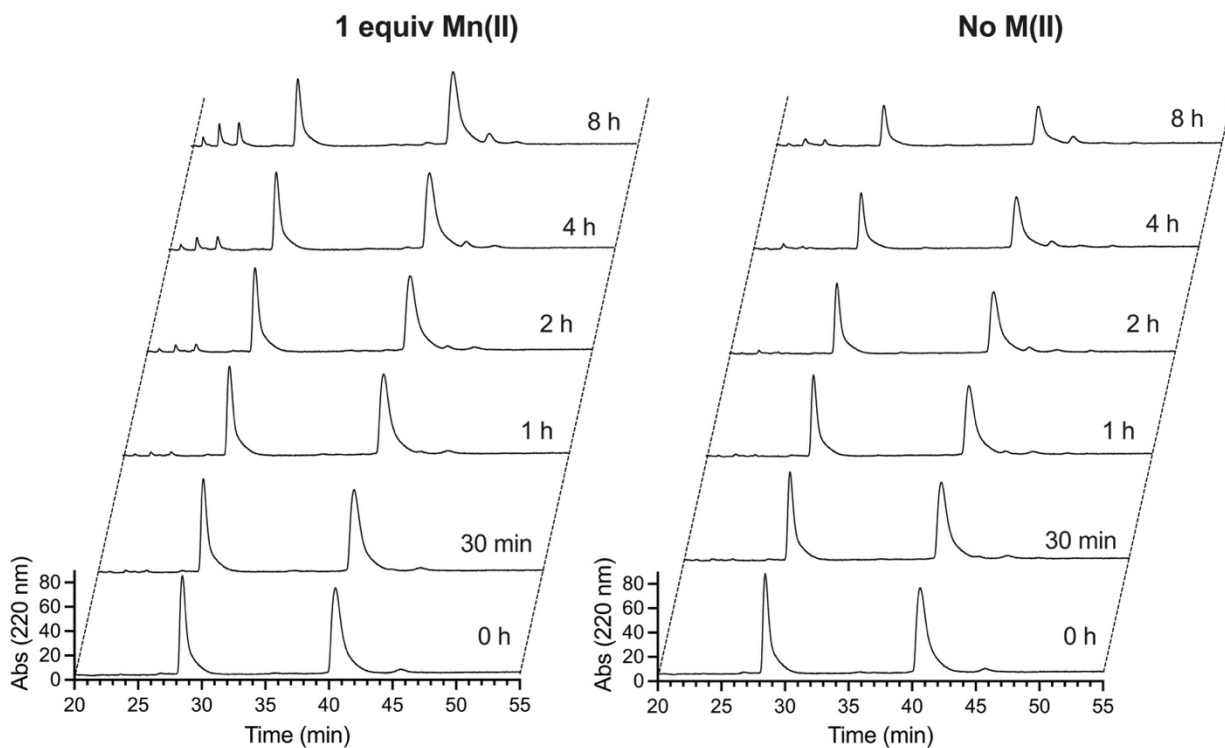

**Figure S27.** Representative full HPLC time-course stack plots for CP-Ser ( $30\ \mu\text{M}$ ) treated with  $1\ \mu\text{M}$  trypsin for 0–8 h in the presence (left) and absence (right) of 1 equiv Mn(II), with  $3\ \text{mM}$  Ca(II) present in all samples.

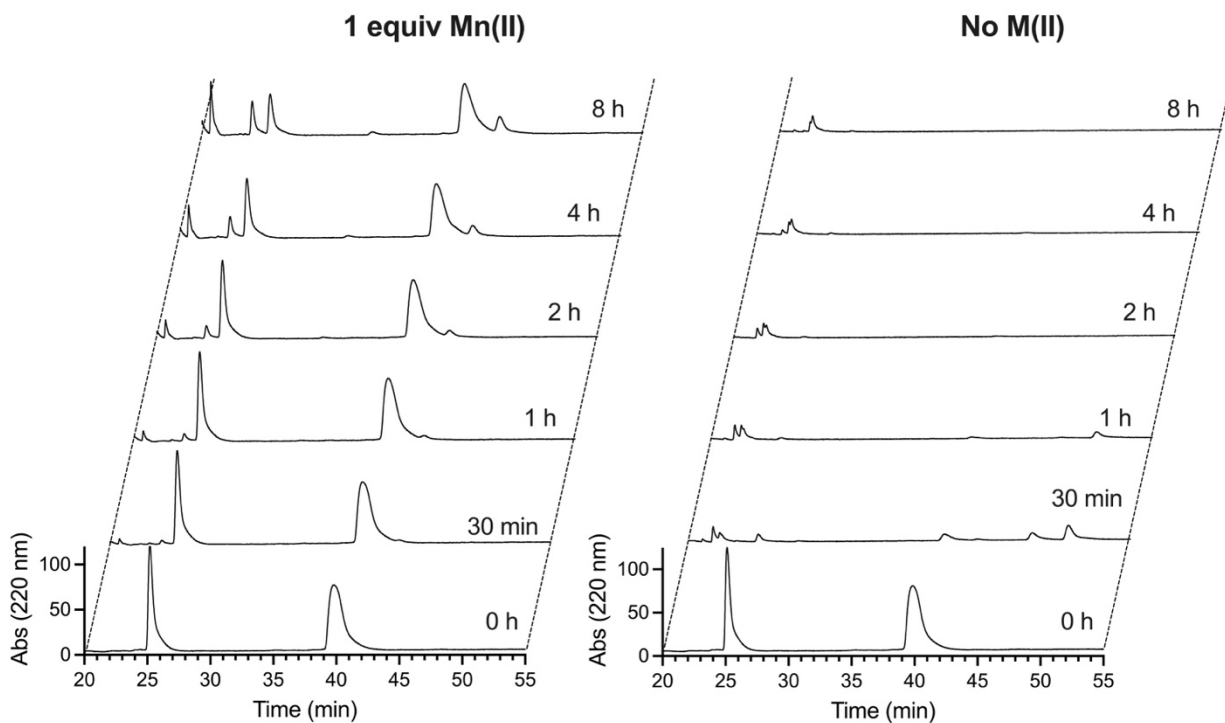

**Figure S28.** Representative full HPLC time-course stack plots for CP-Ser<sup>160E</sup> (30  $\mu$ M) treated with 1  $\mu$ M trypsin for 0–8 h in the presence (left) and absence (right) of 1 equiv Mn(II), with 3 mM Ca(II) present in all samples.

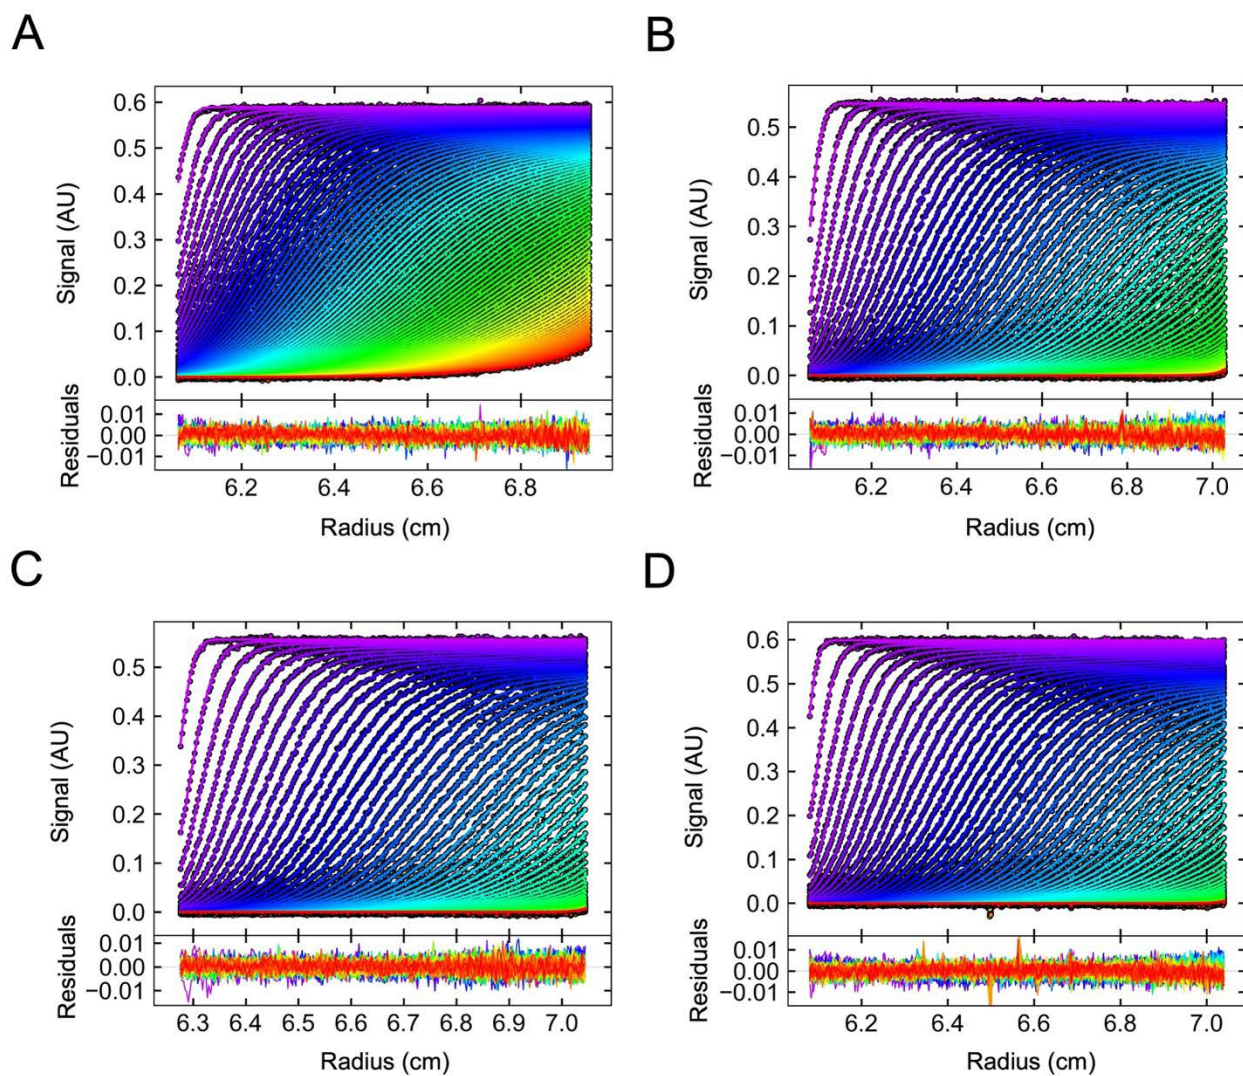

**Figure S29.** Sedimentation boundaries and residuals for dsICP ( $27.5 \mu\text{M}$ ) analyzed by sedimentation velocity analytical ultracentrifugation (SV-AUC), replicate #1. (A) Apo protein. (B) Protein +  $550 \mu\text{M}$  Ca(II). (C) Protein +  $2 \text{ mM}$  Ca(II). (D) Protein +  $550 \mu\text{M}$  Ca(II) +  $27.5 \mu\text{M}$  Mn(II). All samples were analyzed in  $75 \text{ mM}$  HEPES (pH 7.5),  $100 \text{ mM}$  NaCl. Experimental data (black points) are shown with fitted curves (colored lines); residuals are displayed below each boundary plot. Fitting parameters and derived results are reported in **Tables S11** and **S12**, respectively.

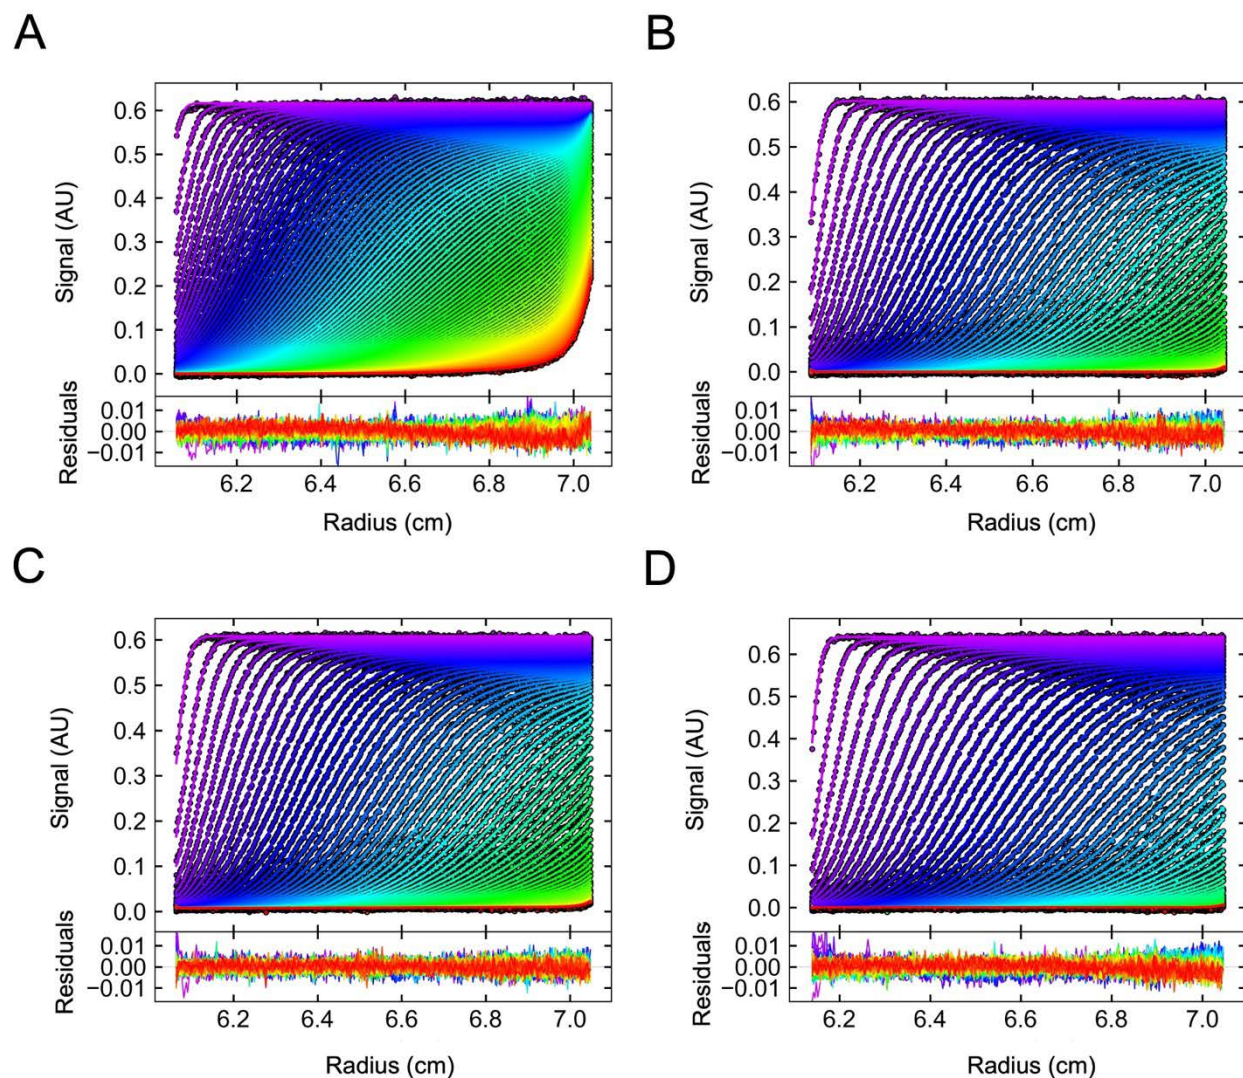

**Figure S30.** Sedimentation boundaries and residuals for CP-Ser (27.5  $\mu\text{M}$ ) analyzed by sedimentation velocity analytical ultracentrifugation (SV-AUC), replicate #1. (A) Apo protein. (B) Protein + 550  $\mu\text{M}$  Ca(II). (C) Protein + 2 mM Ca(II). (D) Protein + 550  $\mu\text{M}$  Ca(II) + 27.5  $\mu\text{M}$  Mn(II). All samples were analyzed in 75 mM HEPES (pH 7.5), 100 mM NaCl. Experimental data (black points) are shown with fitted curves (colored lines); residuals are displayed below each boundary plot. Fitting parameters and derived results are reported in **Tables S11** and **S12**, respectively.

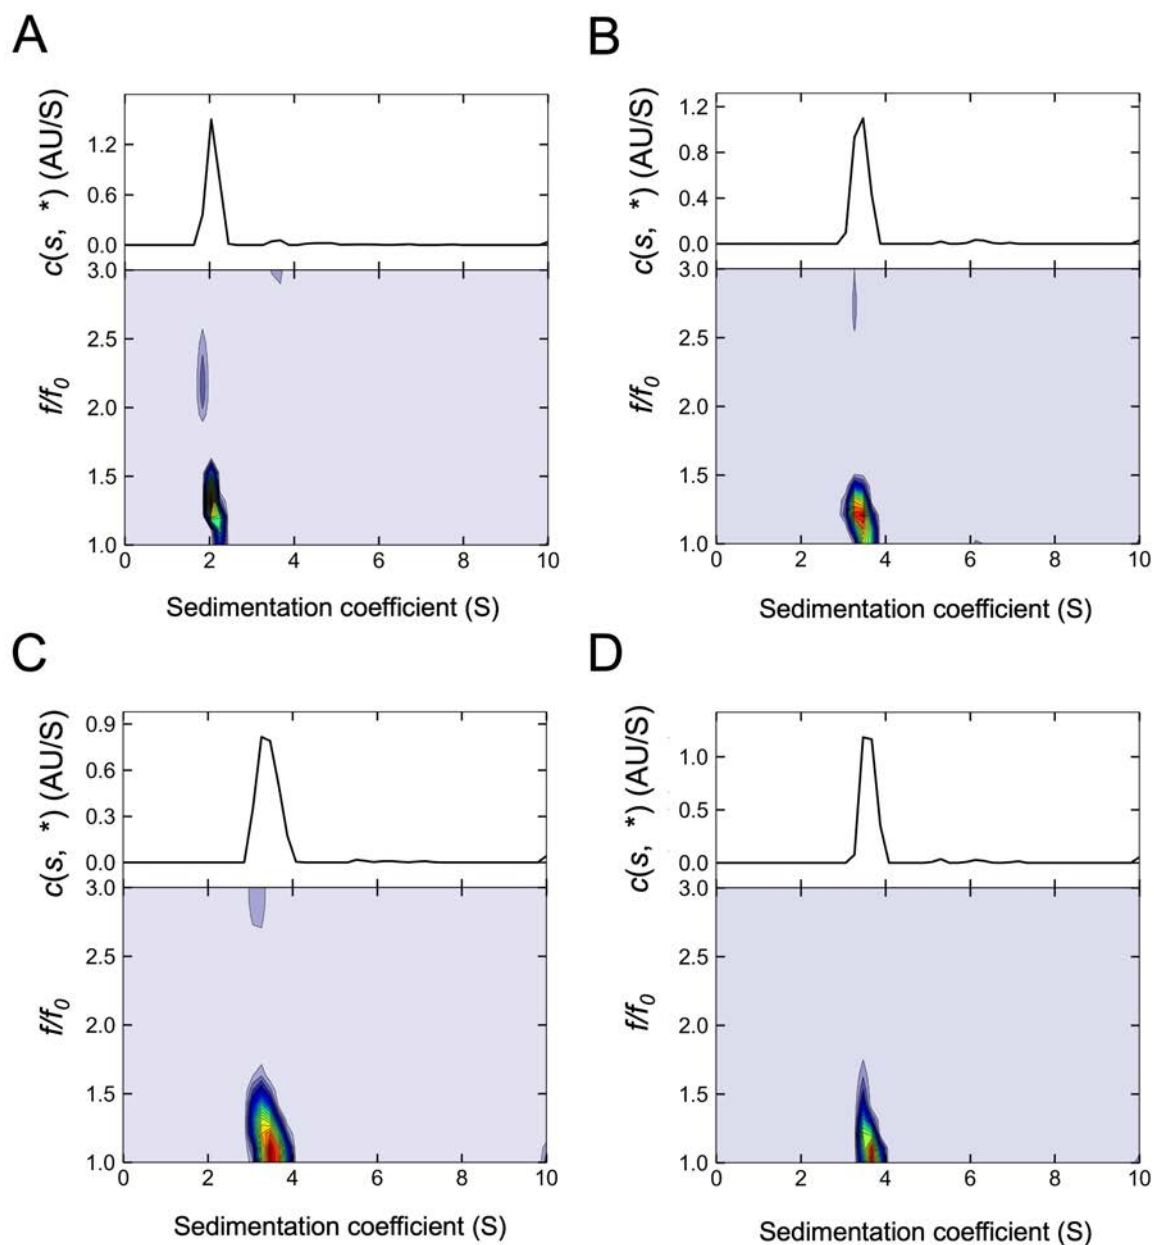

**Figure S31.** Two-dimensional  $c(S)$ – $f/f_0$  distributions for dsICP (27.5  $\mu\text{M}$ ) obtained by sedimentation velocity analytical ultracentrifugation (SV-AUC), replicate #1. Each panel shows the sedimentation-coefficient distribution  $c(S, f/f_0)$  (lower contour plot) and the corresponding one-dimensional  $c(S)$  projection (upper trace). The frictional ratio ( $f/f_0$ ) describes the deviation from an ideal spherical shape; lower  $f/f_0$  values indicate a more compact, globular protein, whereas higher values reflect an elongated or partially unfolded conformation. Sedimentation coefficients were corrected for water and 20 °C ( $S_{20,w}$ ). (A) Apo protein. (B) Protein + 550  $\mu\text{M}$  Ca(II). (C) Protein + 2 mM Ca(II). (D) Protein + 550  $\mu\text{M}$  Ca(II) + 27.5  $\mu\text{M}$  Mn(II). All samples were analyzed in 75 mM HEPES (pH 7.5), 100 mM NaCl. Fitting parameters and derived results are reported in **Tables S11** and **S13**, respectively.

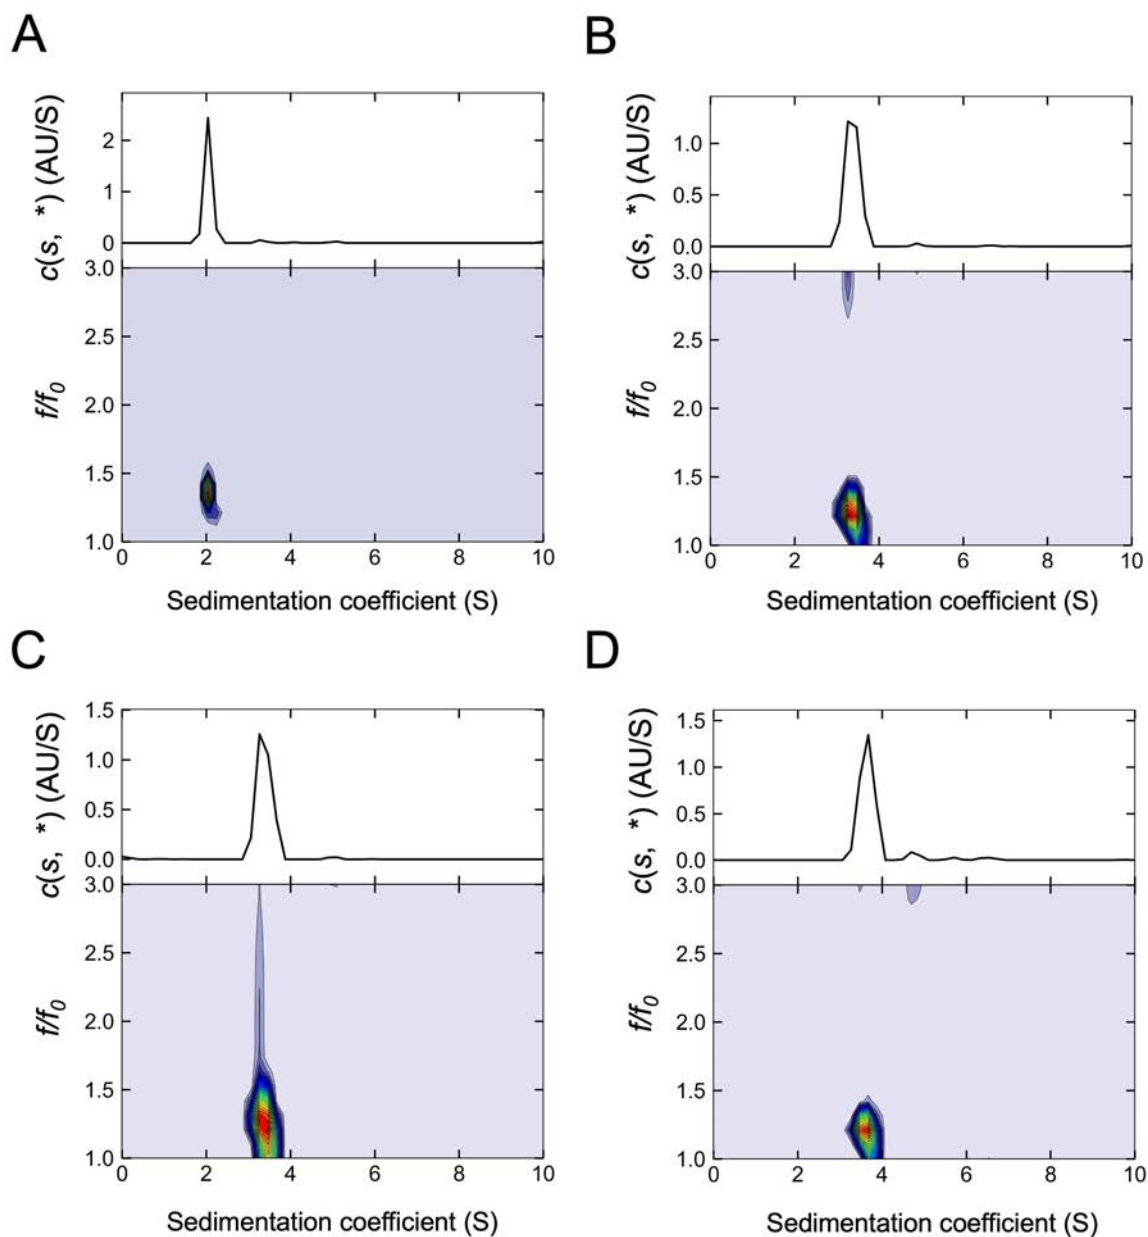

**Figure S32.** Two-dimensional  $c(S)$ – $f/f_0$  distributions for CP-Ser (27.5  $\mu\text{M}$ ) obtained by sedimentation velocity analytical ultracentrifugation (SV-AUC), replicate #1. Each panel shows the sedimentation-coefficient distribution  $c(S, f/f_0)$  (lower contour plot) and the corresponding one-dimensional  $c(S)$  projection (upper trace). The frictional ratio ( $f/f_0$ ) describes the deviation from an ideal spherical shape; lower  $f/f_0$  values indicate a more compact, globular protein, whereas higher values reflect an elongated or partially unfolded conformation. Sedimentation coefficients were corrected for water and 20 °C ( $S_{20,w}$ ). (A) Apo protein. (B) Protein + 550  $\mu\text{M}$  Ca(II). (C) Protein + 2 mM Ca(II). (D) Protein + 550  $\mu\text{M}$  Ca(II) + 27.5  $\mu\text{M}$  Mn(II). All samples were analyzed in 75 mM HEPES (pH 7.5), 100 mM NaCl. Fitting parameters and derived results are reported in **Tables S11** and **S13**, respectively.

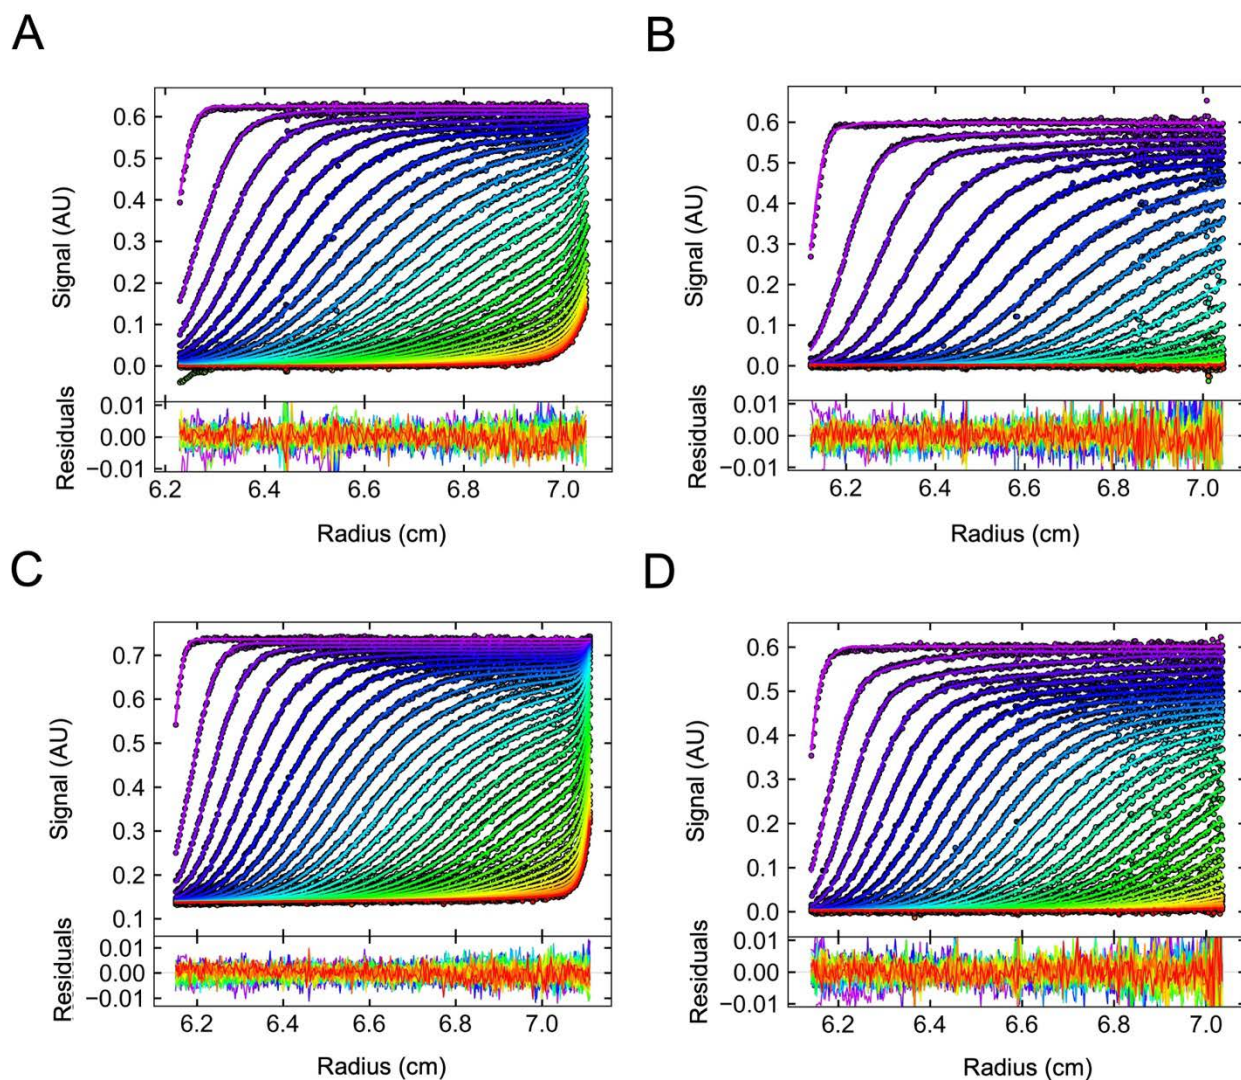

**Figure S33.** Sedimentation boundaries and residuals for dsICP (27.5  $\mu\text{M}$ ) analyzed by sedimentation velocity analytical ultracentrifugation (SV-AUC), replicate #2. (A) Apo protein. (B) Protein + 550  $\mu\text{M}$  Ca(II). (C) Protein + 2 mM Ca(II). (D) Protein + 550  $\mu\text{M}$  Ca(II) + 27.5  $\mu\text{M}$  Mn(II). All samples were analyzed in 75 mM HEPES (pH 7.5), 100 mM NaCl. Experimental data (black points) are shown with fitted curves (colored lines); residuals are displayed below each boundary plot. Fitting parameters and derived results are reported in **Tables S11** and **S12**, respectively.

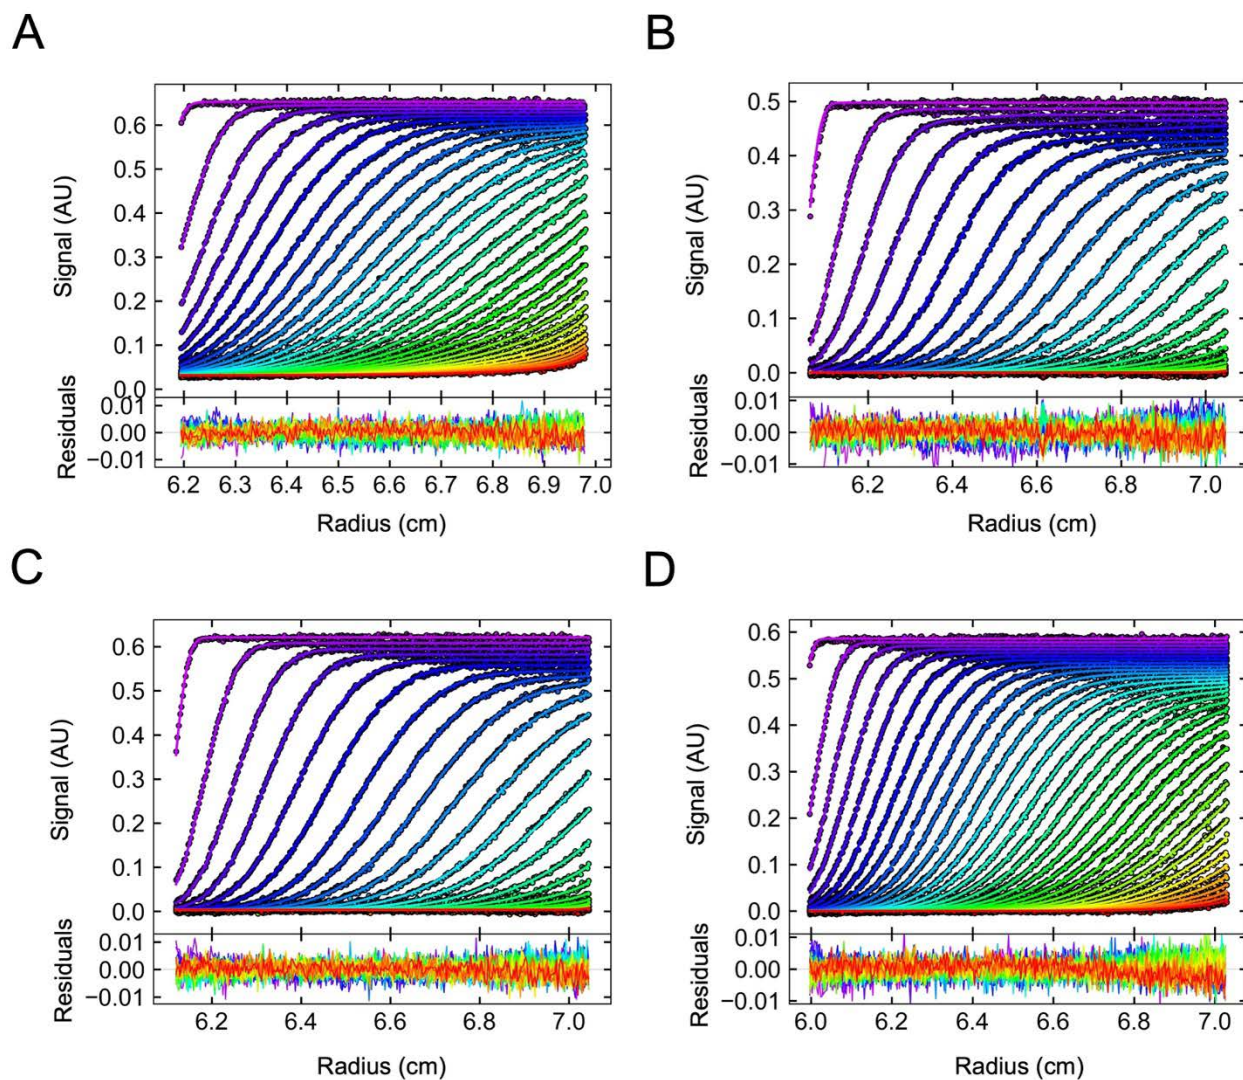

**Figure S34.** Sedimentation boundaries and residuals for CP-Ser (27.5  $\mu\text{M}$ ) analyzed by sedimentation velocity analytical ultracentrifugation (SV-AUC), replicate #2. (A) Apo protein. (B) Protein + 550  $\mu\text{M}$  Ca(II). (C) Protein + 2 mM Ca(II). (D) Protein + 550  $\mu\text{M}$  Ca(II) + 27.5  $\mu\text{M}$  Mn(II). All samples were analyzed in 75 mM HEPES (pH 7.5), 100 mM NaCl. Experimental data (black points) are shown with fitted curves (colored lines); residuals are displayed below each boundary plot. Fitting parameters and derived results are reported in **Tables S11** and **S12**, respectively.

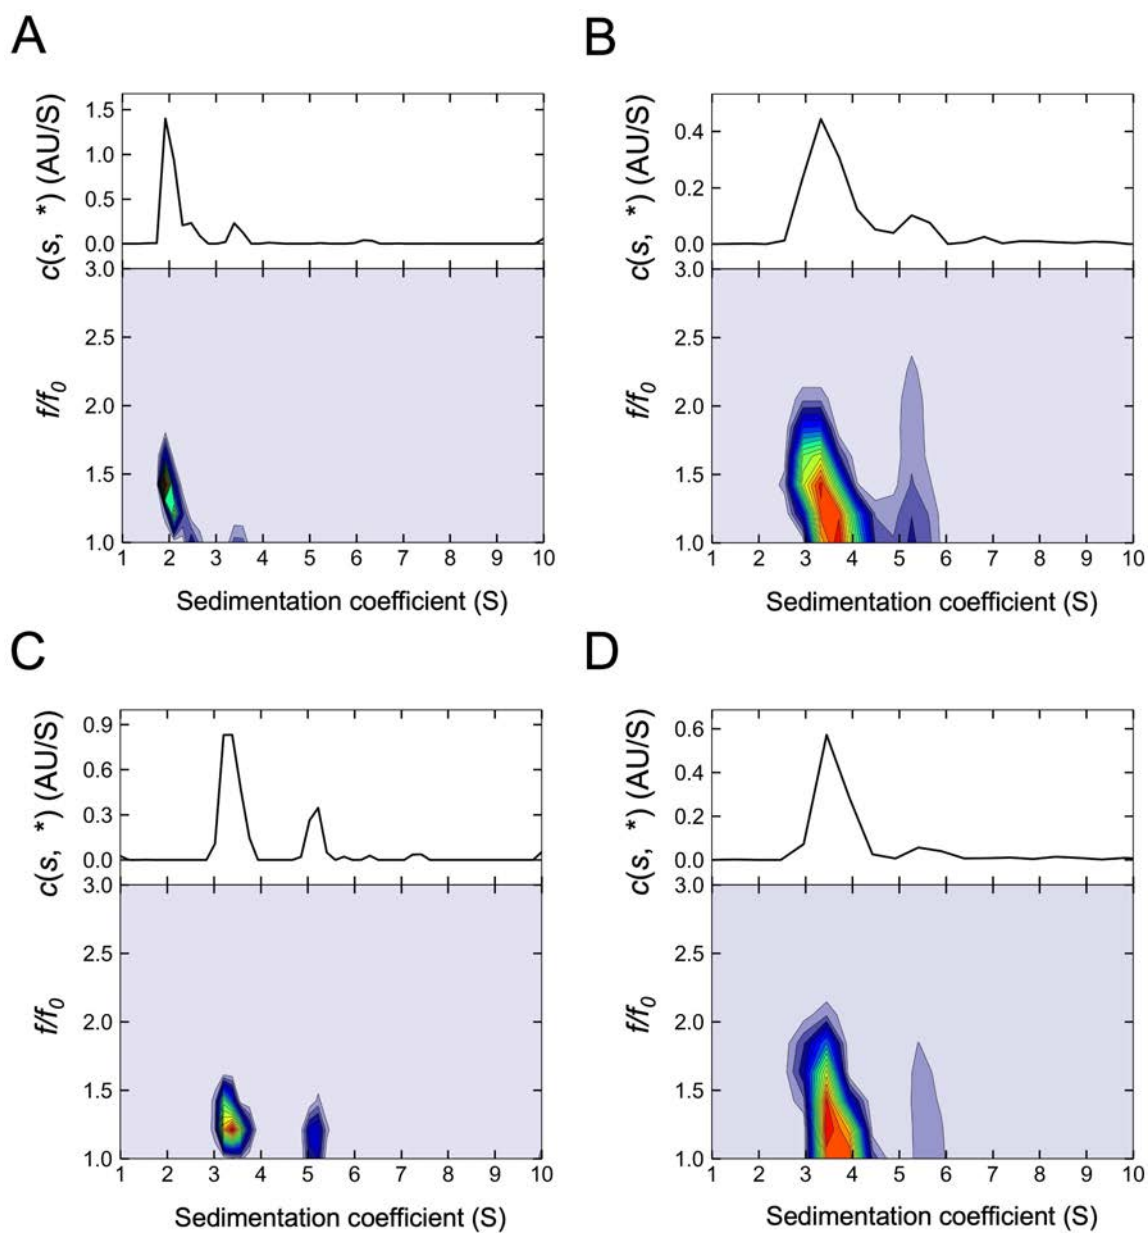

**Figure S35.** Two-dimensional  $c(S)$ – $f/f_0$  distributions for dsICP (27.5  $\mu\text{M}$ ) obtained by sedimentation velocity analytical ultracentrifugation (SV-AUC), replicate #2. Each panel shows the sedimentation-coefficient distribution  $c(S, f/f_0)$  (lower contour plot) and the corresponding one-dimensional  $c(S)$  projection (upper trace). The frictional ratio ( $f/f_0$ ) describes the deviation from an ideal spherical shape; lower  $f/f_0$  values indicate a more compact, globular protein, whereas higher values reflect an elongated or partially unfolded conformation. Sedimentation coefficients were corrected for water and 20 °C ( $S_{20,w}$ ). (A) Apo protein. (B) Protein + 550  $\mu\text{M}$  Ca(II). (C) Protein + 2 mM Ca(II). (D) Protein + 550  $\mu\text{M}$  Ca(II) + 27.5  $\mu\text{M}$  Mn(II). All samples were analyzed in 75 mM HEPES (pH 7.5), 100 mM NaCl. Fitting parameters and derived results are reported in **Tables S11** and **S13**, respectively.

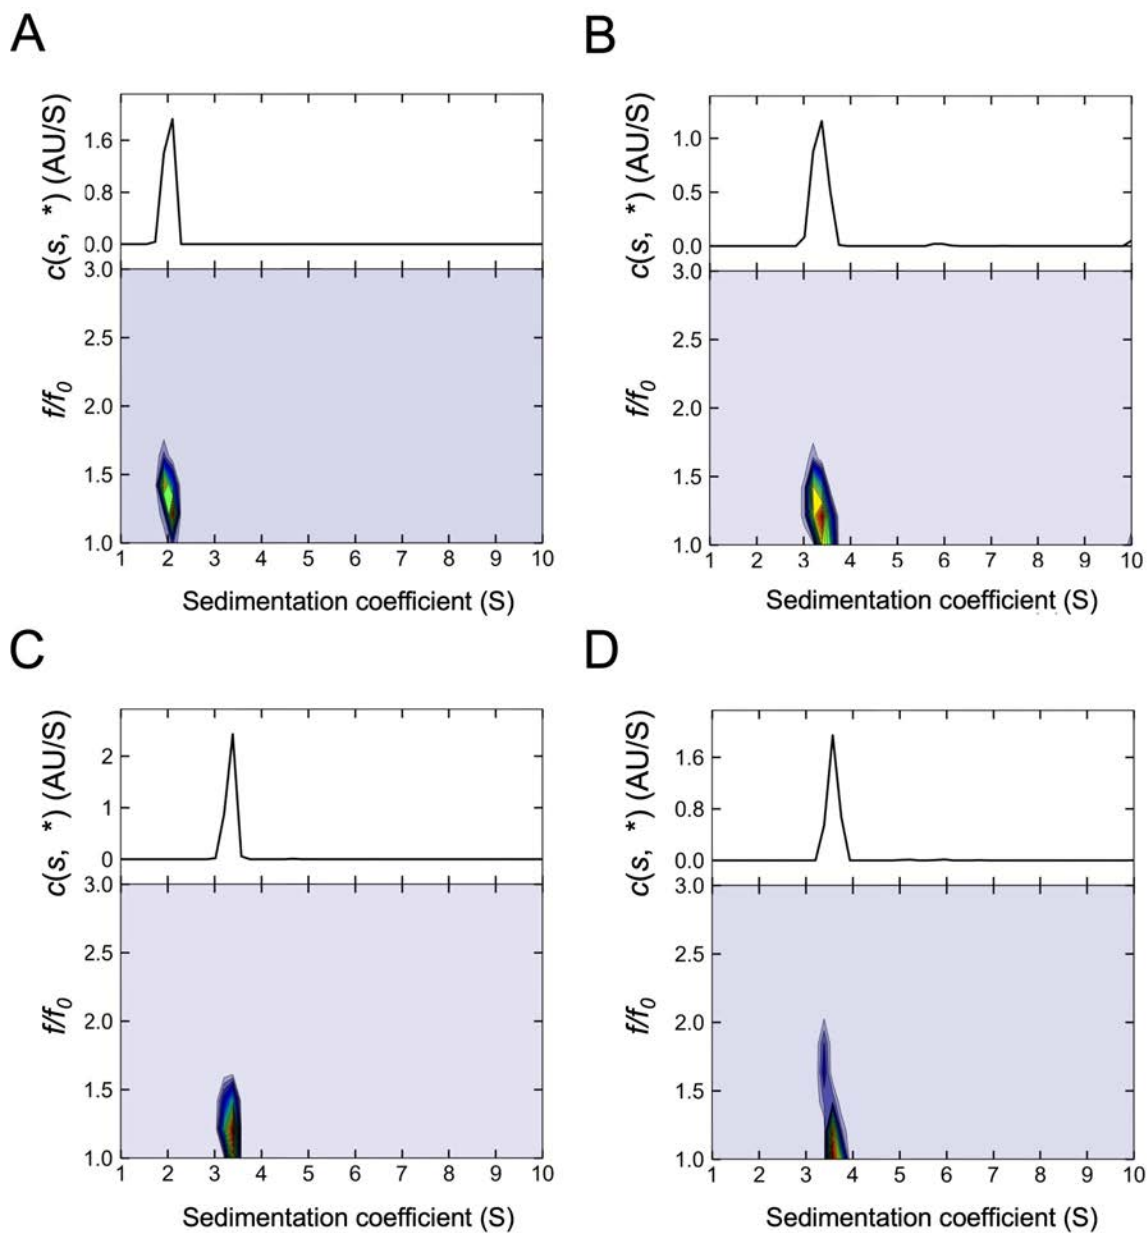

**Figure S36.** Two-dimensional  $c(S)$ – $f/f_0$  distributions for CP-Ser (27.5  $\mu\text{M}$ ) obtained by sedimentation velocity analytical ultracentrifugation (SV-AUC), replicate #2. Each panel shows the sedimentation-coefficient distribution  $c(S, f/f_0)$  (lower contour plot) and the corresponding one-dimensional  $c(S)$  projection (upper trace). The frictional ratio ( $f/f_0$ ) describes the deviation from an ideal spherical shape; lower  $f/f_0$  values indicate a more compact, globular protein, whereas higher values reflect an elongated or partially unfolded conformation. Sedimentation coefficients were corrected for water and 20 °C ( $S_{20,w}$ ). (A) Apo protein. (B) Protein + 550  $\mu\text{M}$  Ca(II). (C) Protein + 2 mM Ca(II). (D) Protein + 550  $\mu\text{M}$  Ca(II) + 27.5  $\mu\text{M}$  Mn(II). All samples were analyzed in 75 mM HEPES (pH 7.5), 100 mM NaCl. Fitting parameters and derived results are reported in **Tables S11** and **S13**, respectively.

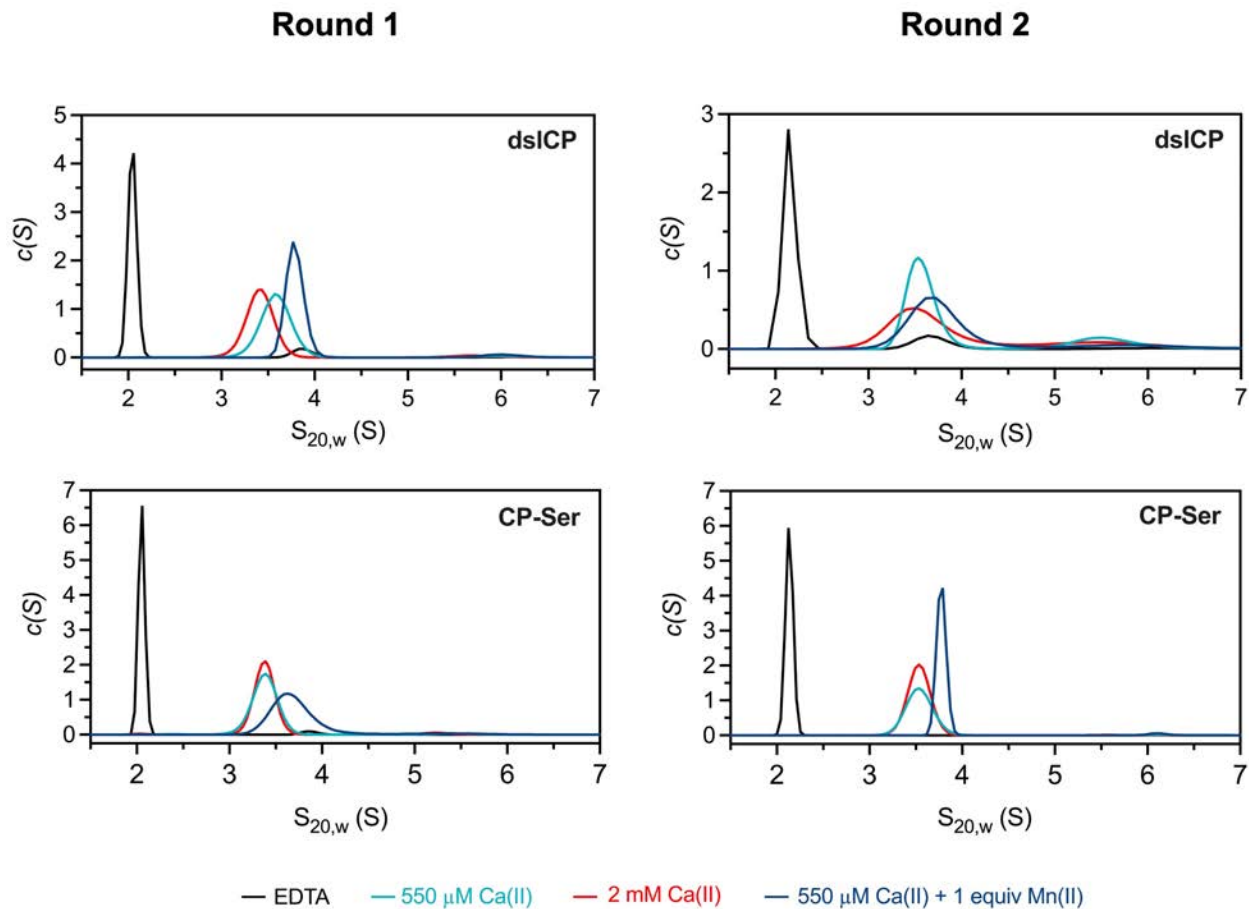

**Figure S37.** Un-normalized  $c(S)$  distributions from SV-AUC analysis of dsICP (*top*) and CP-Ser (*bottom*) from the two independent SV-AUC experiments (Round 1, *left*; Round 2, *right*). Samples (27.5  $\mu\text{M}$  protein) were analyzed in the apo state or after incubation with 20 equiv Ca(II) (550  $\mu\text{M}$ )  $\pm$  1 equiv Mn(II), or with physiological levels of Ca(II) (2 mM), as indicated. All samples were analyzed in 75 mM HEPES (pH 7.5), 100 mM NaCl. Sedimentation coefficients were corrected for water and 20  $^{\circ}\text{C}$  ( $S_{20,w}$ ). Fitting parameters and derived results are reported in **Tables S11** and **S12**, respectively.

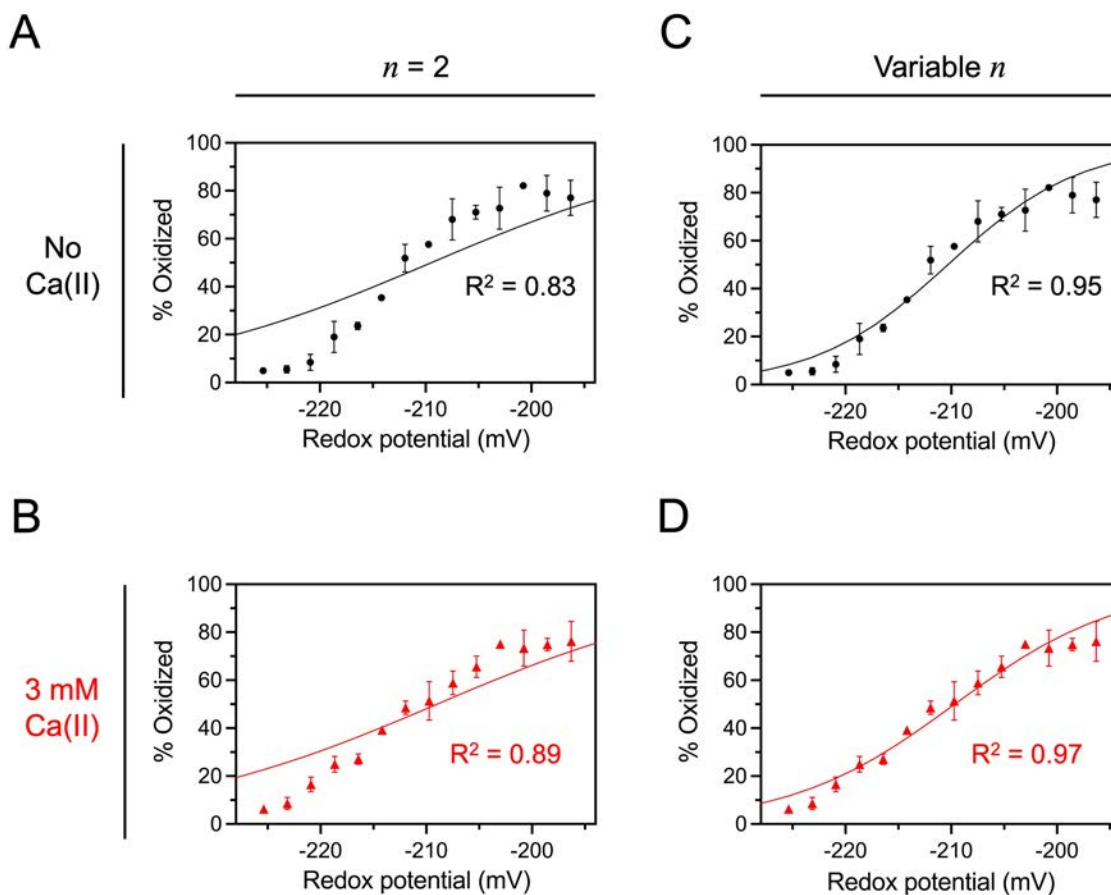

**Figure S38.** Nernst equation fits to dsICP midpoint potential data. (A) No-Ca(II) and (B) +Ca(II)  $E_m$  plots were fitted to a 2-electron reaction at 37 °C (see Supplementary Discussion). Note how the Nernst equation approaches 0% oxidation for low (very negative) mV values and 100% for high mV values, contrary to the data points which plateau at ~80% oxidized protein. Furthermore,  $n = 2$  results in a slope that is too shallow. The same fit was also performed assuming a variable  $n$ , for both (C) no-Ca(II) and (D) Ca(II)-replete  $E_m$  plots. The fits are better, although the asymptotes are not representative of the data.

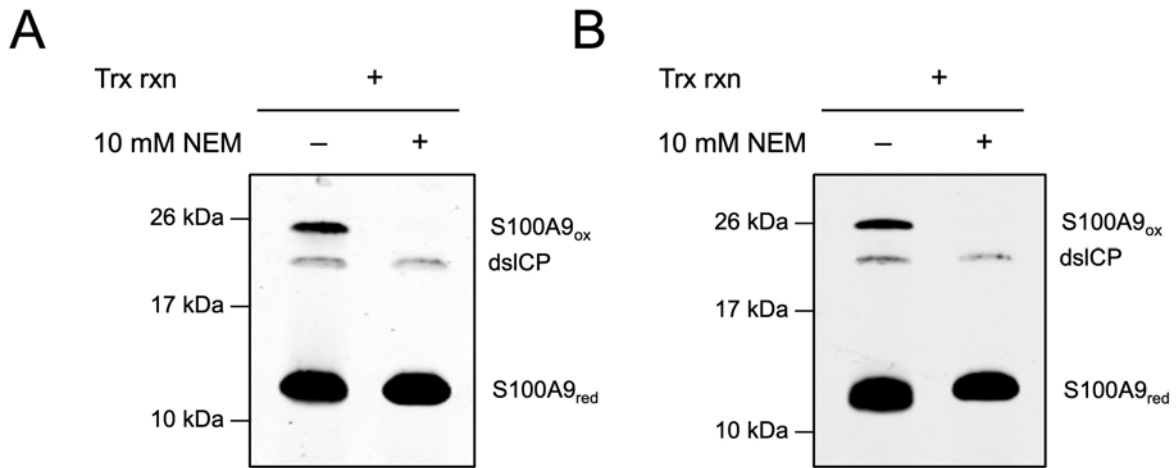

**Figure S39.** N-ethylmaleimide (NEM) is required to prevent adventitious A9 oxidation during SDS-PAGE sample storage and handling. (A) dsICP was incubated with Trx (2.5  $\mu$ M), TrxR (0.05  $\mu$ M) and NADPH (2.5 mM) for 1 h. Then, the reaction was treated with either DMSO (control), or 10 mM NEM. After 10 min, the samples were subjected to SDS-PAGE followed by  $\alpha$ -A9 Western blotting. (B) The same samples as in part A were analyzed by  $\alpha$ -A9 Western blotting after 48 h of storage at  $-20$   $^{\circ}$ C, revealing no A9 oxidation during that time following NEM treatment.

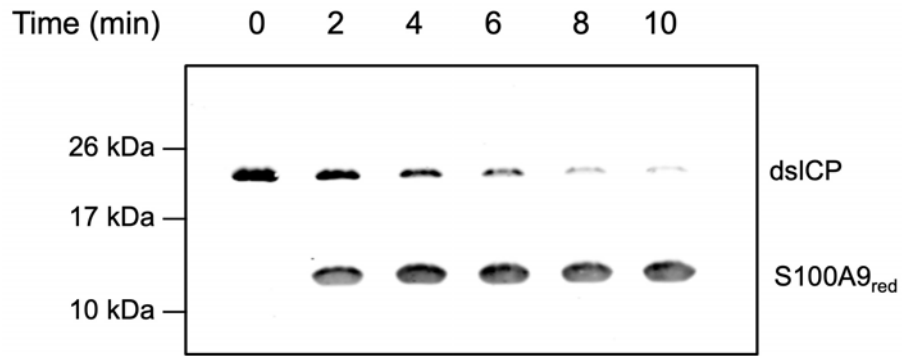

**Figure S40.** 0–10 min time course for dsICP reduction by the Trx system. dsICP was incubated with Trx (2.5  $\mu$ M), TrxR (0.05  $\mu$ M) and NADPH (2.5 mM), and samples were quenched with 10 mM NEM after the following times: 0 min, 2 min, 4 min, 6 min, 8 min and 10 min. Samples were subjected to SDS-PAGE and visualized by  $\alpha$ -A9 Western blotting.

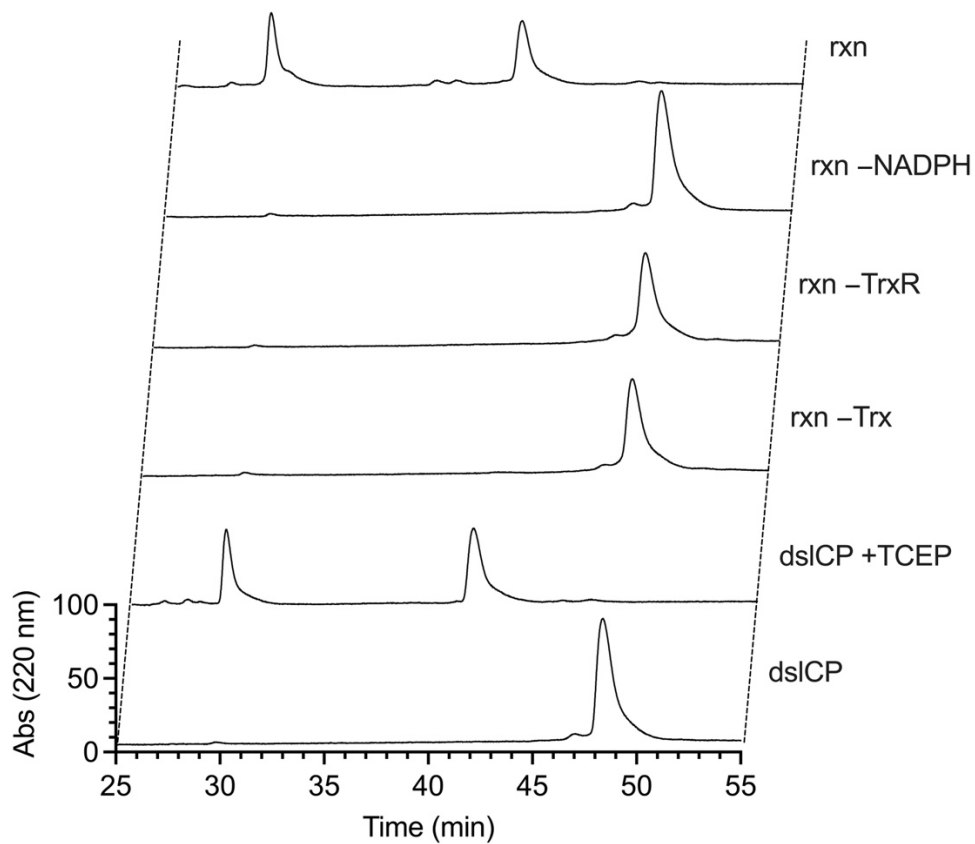

**Figure S41.** Thioredoxin reaction controls. dsICP was incubated with Trx (2.5  $\mu$ M), TrxR (0.05  $\mu$ M) and NADPH (2.5 mM) for 3 h (“rxn”); Trx, TrxR and NADPH were omitted one at a time as shown. dsICP was also treated with TCEP as a positive control for S100A8<sub>red</sub> and S100A9<sub>red</sub> peaks by HPLC.

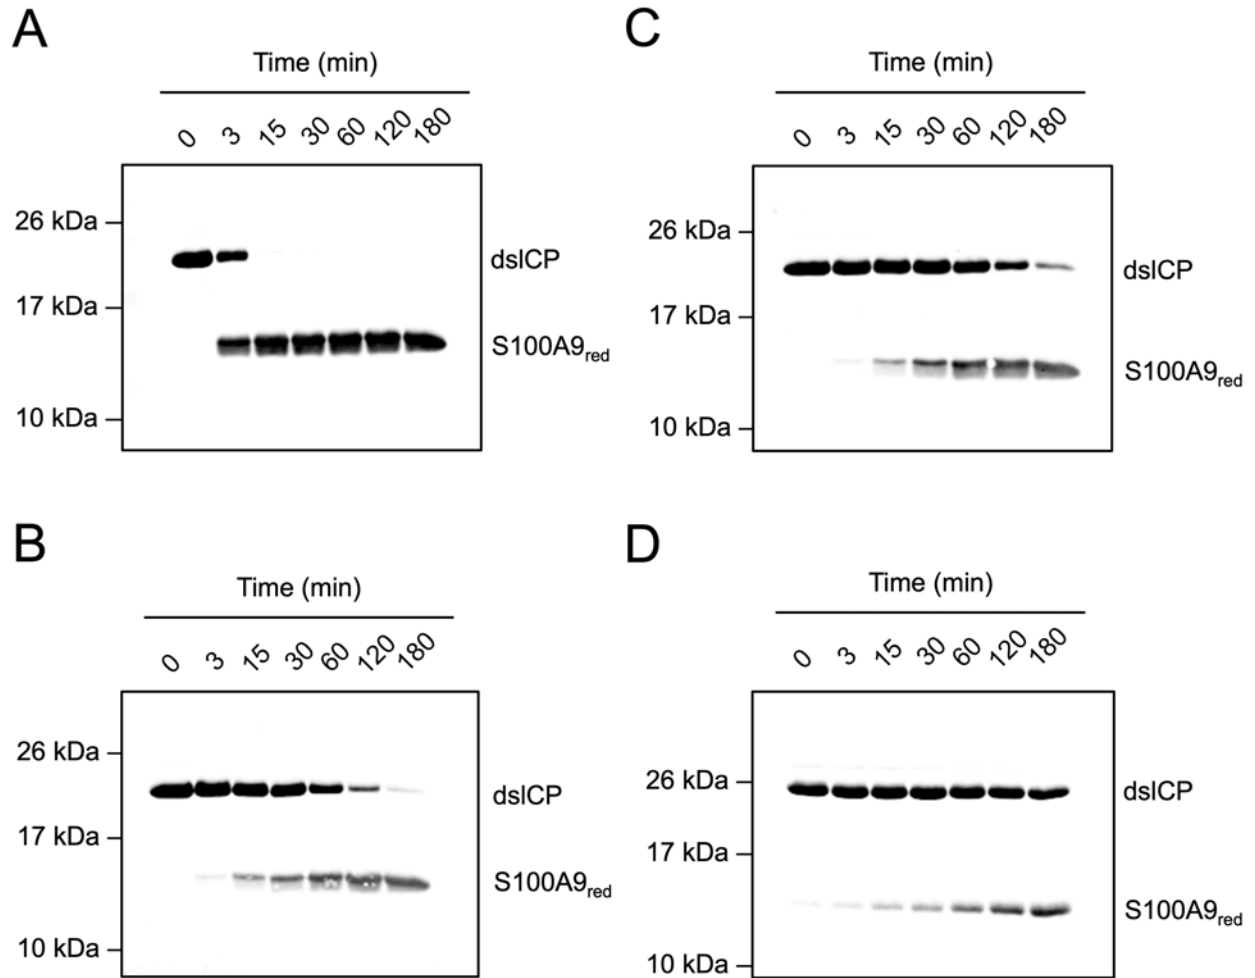

**Figure S42.** Uncut Western blots from **Figure 9B** of the main text. dsICP was incubated with Trx (2.5  $\mu$ M), TrxR (0.05  $\mu$ M) and NADPH (2.5 mM) and either: (A) no added Ca(II)/M(II); (B) 2 mM Ca(II); (C) 2 mM Ca(II) + 1 equiv Mn(II); or (D) 2 mM Ca(II) + 1.9 equiv Zn(II). Samples were taken at the indicated timepoints, subjected to SDS-PAGE, and visualized by  $\alpha$ -A9 Western blotting.

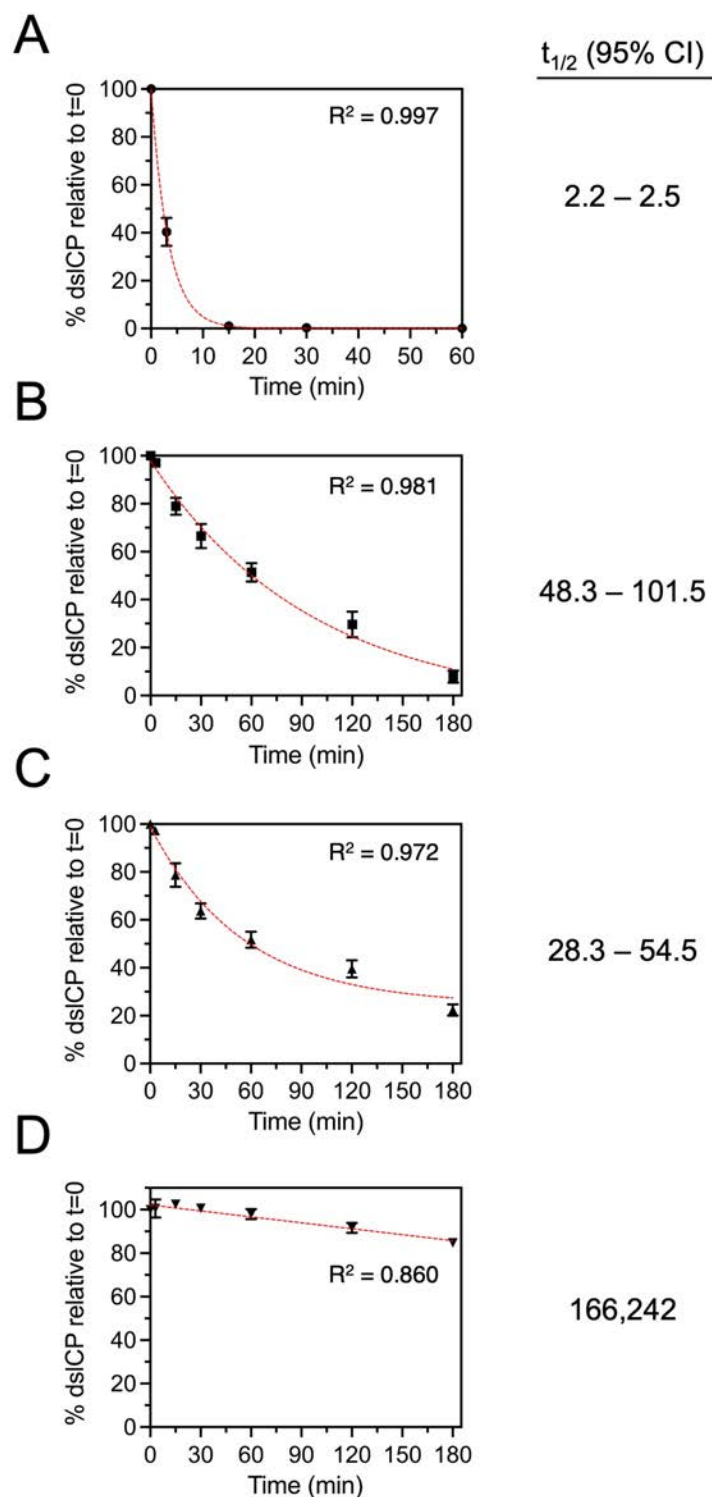

**Figure S43.** dsICP reduction data from **Figure 9C** in the main text (black dots) alongside exponential decay fits (dashed red lines) and associated  $t_{1/2}$  95% confidence intervals (CI; right). (A) No added Ca(II)/M(II) (B) 2 mM Ca(II) (C) 2 mM Ca(II) + 1 equiv Mn(II) (D) 2 mM Ca(II) + 1.9 equiv Zn(II). Note: for D, the fit could not give a precise CI, so the  $t_{1/2}$  value is shown instead.

## Supplementary Tables

**Table S1.** Sequences and molecular weights of S100A8 and S100A9. Cysteines C42(A8) and C3(A9) are highlighted in red and underlined.

| Protein | Amino acid sequence                                                                                                               | M.W. (kDa) |
|---------|-----------------------------------------------------------------------------------------------------------------------------------|------------|
| S100A8  | MLTELEKALNSIIDVYHKYSLIKGNFHAVYRDDLLKKLLETE <u>C</u> P<br>QYIRKKGADVWFKELDINTDGAVNFQEFLILVIKMGVAAHKK<br>SHEESHKE                   | 10.8       |
| S100A9  | MT <u>C</u> KMSQLERNIETIINTFHQYSVKLGHPDTLNQGEFKELVR<br>KDLQNFLKKNKNEKVEIHIMEDLDTNADKQLSFEFIMLMA<br>RLTWASHEKMHEGDEGPGHHHKPGLGEGTP | 13.2       |

**Table S2.** Identities and molecular weights of oxidized CP species.

| Species abbreviation | Molecular identity   | M.W. (kDa) |
|----------------------|----------------------|------------|
| dsICP                | C42(A8)-S-S-C3(A9)   | 24.0       |
| A9 <sub>ox</sub>     | C42(A8)-S-S-C42(A8') | 26.4       |
| A8 <sub>ox</sub>     | C3(A9)-S-S-C3(A9')   | 21.6       |

**Table S3.** Metal ion stocks used.

| Metal   | Compound                                                                              | Stated purity              | Supplier      |
|---------|---------------------------------------------------------------------------------------|----------------------------|---------------|
| Ca      | CaCl <sub>2</sub> • 2H <sub>2</sub> O                                                 | BioUltra, ≥ 99.5%          | Sigma #21097  |
| Mn      | MnCl <sub>2</sub> • 4H <sub>2</sub> O                                                 | 99.99% trace metal basis   | Sigma #203734 |
| Fe      | (NH <sub>4</sub> ) <sub>2</sub> Fe(SO <sub>4</sub> ) <sub>2</sub> • 6H <sub>2</sub> O | 99.99% trace metal basis   | Sigma #450278 |
| Co      | CoCl <sub>2</sub> • H <sub>2</sub> O                                                  | 99.999% trace metal basis  | Sigma #203084 |
| Ni      | NiCl <sub>2</sub> • 6H <sub>2</sub> O                                                 | 99.999% trace metal basis  | Sigma #203866 |
| Cu      | CuSO <sub>4</sub> • 5H <sub>2</sub> O                                                 | 99.999% trace metal basis  | Sigma #203165 |
| Zn      | ZnSO <sub>4</sub> • H <sub>2</sub> O                                                  | ≥99.9% trace metal basis   | Sigma #307491 |
| Fe(III) | FeCl <sub>3</sub> , anhydrous                                                         | ≥99.99% trace metals basis | Sigma #451649 |

**Table S4.** Molecular weights and extinction coefficients of commercially purchased proteins.

| Protein                                  | Supplier / cat #               | M.W. (kDa) | $\epsilon$ ( $M^{-1} cm^{-1}$ ) * |
|------------------------------------------|--------------------------------|------------|-----------------------------------|
| Thioredoxin, human                       | Sigma #T8690                   | 14         | 8,500                             |
| Thioredoxin reductase,<br>from rat liver | Sigma #T9698                   | 55         | 59,000                            |
| Trypsin                                  | Affymetrix #22725              | 23.2       | 30,000                            |
| Human neutrophil elastase                | Fisher Scientific #50-203-6611 | 28.5       | 19,500                            |

\* Extinction coefficients were calculated from the amino acid sequence using the ProtParam tool available on the Expasy server.<sup>S16</sup>

**Table S5.** Theoretical vs. observed  $m/z$  of CP species (Q-TOF MS).  $O_n$  indicates dsICP variants with  $n \times$  MetO residues.

| Species                         | Theoretical $m/z$ | Observed $m/z$ | $\Delta$ (ppm) |
|---------------------------------|-------------------|----------------|----------------|
| A8 <sub>red</sub>               | 10,834.51         | 10,834.65      | 12.9           |
| A9 <sub>red</sub> -Met1         | 13,110.81         | 13,110.83      | 1.5            |
| dsICP -Met1 <sub>A9</sub>       | 23,943.31         | 23,943.40      | 3.8            |
| dsICP $O_1$ -Met1 <sub>A9</sub> | 23,959.31         | 23,959.40      | 3.7            |
| dsICP $O_2$ -Met1 <sub>A9</sub> | 23,975.31         | 23,975.60      | 12.1           |
| dsICP $O_3$ -Met1 <sub>A9</sub> | 23,991.31         | 23,991.60      | 12.1           |
| dsICP $O_4$ -Met1 <sub>A9</sub> | 24,007.31         | 24,007.60      | 12.1           |
| dsICP $O_5$ -Met1 <sub>A9</sub> | 24,023.31         | 24,023.60      | 12.1           |
| dsICP $O_6$ -Met1 <sub>A9</sub> | 24,039.30         | 24,037.40      | 79.0           |

**Table S6.** Quantification of free thiols in CP and dsICP using DTDP assay. Data are mean  $\pm$  SD ( $n = 3$ ). These values indicate 2 and 0 free thiols for CP and dsICP, respectively.

| Species | Free thiols (estimate) |
|---------|------------------------|
| CP      | 1.68 $\pm$ 0.02        |
| dsICP   | -0.07 $\pm$ 0.02       |

**Table S7.** Theoretical and observed  $m/z$  values for dsICP tryptic peptides detected in **Figures S7–S8**. The LLETECPQYIR–TCK peptide contains a disulfide bond between the cysteine residues of the two peptides.

| Tryptic product<br>(amino acid sequence) | Theoretical $m/z$ | Observed $m/z$ | Mass Error (ppm) |
|------------------------------------------|-------------------|----------------|------------------|
| TCK                                      | 351.1697 (1+)     | 351.1710       | +3.7             |
| LLETECPQYIR                              | 1364.6879 (1+)    | 1364.6890      | +0.8             |
| LLETECPQYIR–TCK                          | 856.9210 (2+)     | 856.9245       | +4.1             |

**Table S8.** Thermal denaturation melting temperatures for dsICP and CP in the absence and presence of 2 mM Ca(II). Literature values are indicated where available.

| Protein | 2 mM Ca(II) | Fit                               | $T_{m1}$ (°C)  | $T_{m2}$ (°C) | Literature value (°C)   |
|---------|-------------|-----------------------------------|----------------|---------------|-------------------------|
| dsICP   | -           | 1-state Boltzmann<br>(Equation 1) | $73.9 \pm 0.9$ | --            | N/A                     |
|         | -           | 2-state Boltzmann<br>Equation (2) | 75.3*          | 85.9*         | N/A                     |
|         | +           | 1-state Boltzmann<br>(Equation 1) | $85.2 \pm 0.2$ | --            | N/A                     |
| CP      | -           | 1-state Boltzmann<br>(Equation 1) | $73.1 \pm 0.1$ | --            | 59 (ref <sup>S1</sup> ) |
|         | +           | 1-state Boltzmann<br>(Equation 1) | $85.6 \pm 0.1$ | --            | 79 (ref <sup>S1</sup> ) |

\*Individual replicates that appeared to have a non-singular transition were combined and fitted to obtain these values. Errors could not be extracted from the fit.  $n = 7$ .

**Table S9.** Molecular weights from SEC chromatograms of dsICP and CP in the absence and presence of 2 mM Ca(II). See **Figure S12** for the standard curve used.

| Protein | 2 mM Ca(II) | Elution volume (mL) | M.W. of main peak (kDa) |
|---------|-------------|---------------------|-------------------------|
| dsICP   | -           | 11.1                | 36                      |
|         | +           | 10.5                | 49                      |
| CP      | -           | 11.1                | 36                      |
|         | +           | 10.4                | 47                      |

**Table S10.** Strains used in this study.

| <b>Species</b>                                    | <b>Strain</b>          | <b>Source</b>    |
|---------------------------------------------------|------------------------|------------------|
| <i>Staphylococcus aureus</i>                      | USA300 JE2             | NARSA repository |
| <i>Escherichia coli</i>                           | CFT073 (ATCC 700928)   | ATCC             |
| <i>Klebsiella pneumoniae</i>                      | ATCC 13883             | Walsh Lab        |
| <i>Salmonella enterica</i><br>serovar Typhimurium | IR715                  | Raffatellu Lab   |
| <i>Acinetobacter baumannii</i>                    | ATCC 17978             | ATCC             |
| <i>Pseudomonas aeruginosa</i>                     | UCBPP-PA14             | Newman Lab       |
| <i>Candida albicans</i>                           | SC5314 (ATCC MYA-2876) | Lindquist Lab    |

**Table S11.** Parameters used for SV-AUC  $c(S)$  analyses of dslCP and CP-Ser.

| <b>Parameter</b>                                   | <b>Units</b>       | <b>Buffer Composition<sup>†</sup></b>                                   | <b>Value</b> |
|----------------------------------------------------|--------------------|-------------------------------------------------------------------------|--------------|
| Solvent Density ( $\rho$ ) <sup>*</sup>            | g mL <sup>-1</sup> | Buffer + 1.35 mM EDTA                                                   | 1.0084       |
|                                                    |                    | Buffer + 550 $\mu$ M CaCl <sub>2</sub>                                  | 1.0082       |
|                                                    |                    | Buffer + 2 mM CaCl <sub>2</sub>                                         | 1.0084       |
|                                                    |                    | Buffer + 550 $\mu$ M CaCl <sub>2</sub> + 27.5 $\mu$ M MnCl <sub>2</sub> | 1.0083       |
| Solvent Viscosity ( $\eta$ ) <sup>*</sup>          | P                  | Buffer + 1.35 mM EDTA                                                   | 0.01057      |
|                                                    |                    | Buffer + 550 $\mu$ M CaCl <sub>2</sub>                                  | 0.01056      |
|                                                    |                    | Buffer + 2 mM CaCl <sub>2</sub>                                         | 0.01056      |
|                                                    |                    | Buffer + 550 $\mu$ M CaCl <sub>2</sub> + 27.5 $\mu$ M MnCl <sub>2</sub> | 0.01056      |
| Partial Specific Volume ( $\bar{v}$ ) <sup>*</sup> | mL g <sup>-1</sup> | dslCP                                                                   | 0.738        |
|                                                    |                    | CP-Ser                                                                  | 0.738        |

<sup>†</sup> Buffer = 75 mM HEPES, 100 mM NaCl, pH 7.5

<sup>\*</sup> Determined from chemical composition using SEDNTERP

**Table S12.** Parameters derived from SV-AUC  $c(S)$  analyses of dsICP and CP-Ser.

| Species                                         | Replicate | c(S) Analysis |             |                |               |             |                | Global<br>f/f <sub>0</sub> |
|-------------------------------------------------|-----------|---------------|-------------|----------------|---------------|-------------|----------------|----------------------------|
|                                                 |           | Major Species |             |                | Minor Species |             |                |                            |
|                                                 |           | $S_{20,w}$    | %<br>Signal | $M_w$<br>(kDa) | $S_{20,w}$    | %<br>Signal | $M_w$<br>(kDa) |                            |
| dsICP + 1.35 mM<br>EDTA                         | 1         | 2.1           | 88.5        | 23.6           | 3.9           | 8.2         | 61.6           | 1.4                        |
|                                                 | 2         | 2.1           | 82.8        | 24.0           | 3.6           | 12.5        | 53.7           | 1.3                        |
| dsICP + 550 $\mu$ M Ca(II)                      | 1         | 3.4           | 93.2        | 43.0           | 5.9           | 4.5         | 98.1           | 1.3                        |
|                                                 | 2         | 3.5           | 68.1        | 54.7           | 5.5           | 20.0        | 108            | 1.4                        |
| dsICP + 2 mM Ca(II)                             | 1         | 3.6           | 93.8        | 47.4           | 6.0           | 4.0         | 104            | 1.2                        |
|                                                 | 2         | 3.5           | 60.1        | 46.2           | 5.5           | 16.7        | 90.3           | 1.2                        |
| dsICP + 550 $\mu$ M Ca(II)<br>+ 1 equiv Mn(II)  | 1         | 3.8           | 91.6        | 49.0           | 6.0           | 5.2         | 98.1           | 1.2                        |
|                                                 | 2         | 3.7           | 72.7        | 58.6           | 5.7           | 11.4        | 118            | 1.4                        |
| CP-Ser + 1.35 mM<br>EDTA                        | 1         | 2.1           | 95.8        | 22.9           | 3.8           | 3.4         | 57.9           | 1.4                        |
|                                                 | 2         | 2.1           | 94.9        | 23.5           | -             | -           | -              | 1.3                        |
| CP-Ser + 2 mM Ca(II)                            | 1         | 3.4           | 96.3        | 44.4           | 5.4           | 2.6         | 87.1           | 1.3                        |
|                                                 | 2         | 3.5           | 95.9        | 46.0           | 6.2           | 2.1         | 91.3           | 1.2                        |
| CP-Ser + 550 $\mu$ M Ca(II)                     | 1         | 3.4           | 91.7        | 45.2           | 2.0           | 0.8         | 93.1           | 1.3                        |
|                                                 | 2         | 3.5           | 98.8        | 46.7           | 5.6           | 0.6         | 114            | 1.2                        |
| CP-Ser + 550 $\mu$ M Ca(II)<br>+ 1 equiv Mn(II) | 1         | 3.6           | 92.9        | 46.2           | 5.3           | 5.4         | 76.3           | 1.2                        |
|                                                 | 2         | 3.8           | 97.6        | 47.2           | 6.1           | 2.4         | 97.1           | 1.2                        |

All fits had RMSD  $\leq$  0.003.

**Table S13.** Parameters derived from SV-AUC  $c(S, f/f_0)$  analyses of dsICP and CP-Ser.

| Species                                         | Replicate | $c(S, f/f_0)$ Analysis |             |         |            |             |         |
|-------------------------------------------------|-----------|------------------------|-------------|---------|------------|-------------|---------|
|                                                 |           | Peak 1                 |             |         | Peak 2     |             |         |
|                                                 |           | $S_{20,w}$             | $M_w$ (kDa) | $f/f_0$ | $S_{20,w}$ | $M_w$ (kDa) | $f/f_0$ |
| dsICP + 1.35 mM EDTA                            | 1         | 2.1                    | 22.8        | 1.4     | -          | -           | -       |
|                                                 | 2         | 2.1                    | 23.2        | 1.3     | 3.5        | 33.3        | 1.0     |
| dsICP + 550 $\mu$ M Ca(II)                      | 1         | 3.4                    | 40.1        | 1.2     | -          | -           | -       |
|                                                 | 2         | 3.5                    | 45.5        | 1.3     | 5.3        | 97.2        | 1.4     |
| dsICP + 2 mM Ca(II)                             | 1         | 3.4                    | 46.7        | 1.3     | -          | -           | -       |
|                                                 | 2         | 3.4                    | 40.3        | 1.3     | 5.5        | 66.4        | 1.2     |
| dsICP + 550 $\mu$ M Ca(II)<br>+ 1 equiv Mn(II)  | 1         | 3.6                    | 42.7        | 1.2     | -          | -           | -       |
|                                                 | 2         | 3.6                    | 47.5        | 1.3     | 5.6        | 99.1        | 1.4     |
| CP-Ser + 1.35 mM<br>EDTA                        | 1         | 2.0                    | 23.2        | 1.4     | -          | -           | -       |
|                                                 | 2         | 2.0                    | 20.6        | 1.3     | -          | -           | -       |
| CP-Ser + 550 $\mu$ M Ca(II)                     | 1         | 3.4                    | 39.3        | 1.2     | -          | -           | -       |
|                                                 | 2         | 3.4                    | 38.2        | 1.2     | -          | -           | -       |
| CP-Ser + 2 mM Ca(II)                            | 1         | 3.4                    | 47.4        | 1.4     | -          | -           | -       |
|                                                 | 2         | 3.3                    | 37.2        | 1.2     | -          | -           | -       |
| CP-Ser + 550 $\mu$ M Ca(II)<br>+ 1 equiv Mn(II) | 1         | 3.6                    | 44.0        | 1.3     | -          | -           | -       |
|                                                 | 2         | 3.6                    | 41.1        | 1.2     | -          | -           | -       |

All fits had RMSD  $\leq$  0.003.

**Table S14.** Nernst equation fitting results of  $-Ca(II)$   $E_m$  data.

| Model                  | Equation | $E_m$            | $n$ | $h$ | $Y_{min}$ | $Y_{max}$ | $R^2$ |
|------------------------|----------|------------------|-----|-----|-----------|-----------|-------|
| Nernst ( $n = 2$ )     | (7)      | $-209.5 \pm 2.4$ | -   | -   | -         | -         | 0.83  |
| Nernst (variable $n$ ) | (8)      | $-210.3 \pm 0.8$ | 4.3 | -   | -         | -         | 0.95  |
| 4P Hill-Nernst         | (9)      | $-213.5 \pm 0.9$ | -   | 3.7 | 1.2       | 79.6      | 0.97  |

**Table S15.** Nernst equation fitting results of  $+Ca(II)$   $E_m$  data.

| Model                  | Equation | $E_m$            | $n$ | $h$ | $Y_{min}$ | $Y_{max}$ | $R^2$ |
|------------------------|----------|------------------|-----|-----|-----------|-----------|-------|
| Nernst ( $n = 2$ )     | (7)      | $-209.0 \pm 1.7$ | -   | -   | -         | -         | 0.89  |
| Nernst (variable $n$ ) | (8)      | $-209.7 \pm 0.7$ | 3.4 | -   | -         | -         | 0.97  |
| 4P Hill-Nernst         | (9)      | $-213.3 \pm 2.4$ | -   | 2.3 | 0         | 81.1      | 0.96  |

**Table S16.** Midpoint potential values of a variety of important redox-active biomolecules, and a selection of prokaryotic and eukaryotic cysteine-containing proteins.

| Species                                         | Source               | Description                                         | $E_m$ (mV) | Ref. |
|-------------------------------------------------|----------------------|-----------------------------------------------------|------------|------|
| Bovine pancreatic trypsin inhibitor (aprotinin) | <i>Bos taurus</i>    | Potent serine protease inhibitor                    | -470*      | S17  |
| Metallothionein                                 | Mammalian            | Zinc-binding, redox signaling                       | < -366     | S18  |
| ResA                                            | <i>B. subtilis</i>   | Cytochrome c maturation                             | -345       | S19  |
| DTT <sub>ox</sub> /DTT <sub>red</sub>           | -                    | Small molecule reducing agent                       | -330       | S20  |
| NADP <sup>+</sup> /NADPH <sup>§</sup>           | -                    | Nicotinamide electron and hydride donor             | -320       | S21  |
| βII-Tryptase (C220–C248 only)                   | <i>H. sapiens</i>    | Mast cell serine protease                           | -301       | S22  |
| <i>S. cerevisiae</i> Trx1                       | <i>S. cerevisiae</i> | Major yeast cytosolic redox protein                 | -275 ± 1   | S23  |
| <i>E. coli</i> Trx1                             | <i>E. coli</i>       | Primary prokaryotic cytosolic redox protein         | -270       | S24  |
| <i>S. cerevisiae</i> Trx2                       | <i>S. cerevisiae</i> | Mitochondrial/cytosolic antioxidant                 | -265 ± 10  | S23  |
| NrdH-redoxin                                    | <i>E. coli</i>       | Electron donor for ribonucleotide reductase         | -249       | S25  |
| GSH/GSSG                                        | -                    | Abundant low-molecular-weight cellular redox buffer | -245       | S26  |
| <i>E. coli</i> Grx1                             | <i>E. coli</i>       | Cytosolic redox enzyme                              | -233       | S27  |
| Human Glutaredoxin 1 (hGrx1)                    | <i>H. sapiens</i>    | GSH-dependent cytosolic reductant                   | -232       | S28  |
| Human Thioredoxin 1                             | <i>H. sapiens</i>    | Primary human cytosolic redox regulator             | -230       | S29  |
| Human Glutaredoxin 2 (hGrx2)                    | <i>H. sapiens</i>    | GSH-dependent cytosolic reductant                   | -221       | S28  |
| Coenzyme A                                      | -                    | Metabolic enzyme cofactor                           | -199 ± 2   | S30  |
| <i>E. coli</i> Grx3                             | <i>E. coli</i>       | Cytosolic redox enzyme                              | -198       | S27  |
| Cysteine                                        | -                    | Free amino acid                                     | -188 ± 1   | S30  |
| TG2 (C370–C371)                                 | <i>H. sapiens</i>    | GTP-binding protein and transglutaminase            | -184       | S31  |
| Protein disulfide isomerase (PDI)               | <i>H. sapiens</i>    | ER oxidative folding and isomerization              | -175       | S32  |
| ERp57                                           | <i>H. sapiens</i>    | ER folding of heavily glycosylated proteins         | -158       | S33  |
| DsbC                                            | <i>E. coli</i>       | Periplasmic disulfide bond isomerase                | -130       | S34  |
| DsbG                                            | <i>E. coli</i>       | Periplasmic isomerase/repair                        | -125       | S35  |
| DsbA                                            | <i>E. coli</i>       | Primary periplasmic disulfide bond oxidase          | -120       | S36  |

\*The exceptional stability of the disulfide bond in aprotinin is a consequence of tight packing and the hydrophobicity of the protein, which results in a high entropic penalty for the unfolded state.<sup>S37</sup>

§Refers to a nicotinamide adenine dinucleotide couple; all other values represent thiol-disulfide redox couples.

## Supplementary References

- S1 M. B. Brophy, J. A. Hayden and E. M. Nolan, *J. Am. Chem. Soc.*, 2012, **134**, 18089–18100.
- S2 J. R. Stephan and E. M. Nolan, *Chem. Sci.*, 2016, **7**, 1962–1975.
- S3 T. G. Nakashige, E. M. Zygiel, C. L. Drennan and E. M. Nolan, *J. Am. Chem. Soc.*, 2017, **139**, 8828–8836.
- S4 T. G. Nakashige, J. R. Stephan, L. S. Cunden, M. B. Brophy, A. J. Wommack, B. C. Keegan, J. M. Shearer and E. M. Nolan, *J. Am. Chem. Soc.*, 2016, **138**, 12243–12251.
- S5 Y. A. Wanniarachchi, P. Kaczmarek, A. Wan and E. M. Nolan, *Biochemistry*, 2011, **50**, 8005–8017.
- S6 T. G. Nakashige, B. Zhang, C. Krebs and E. M. Nolan, *Nat. Chem. Biol.*, 2015, **11**, 765–771.
- S7 E. M. Zygiel, A. O. Obisesan, C. E. Nelson, A. G. Oglesby and E. M. Nolan, *J. Biol. Chem.*, 2021, **296**, 100160.
- S8 B. Schwyn and J. B. Neilands, *Anal. Biochem.*, 1987, **160**, 47–56.
- S9 D. B. Alexander and D. A. Zuberer, *Biol. Fertil. Soils*, 1991, **12**, 39–45.
- S10 J. R. Stephan, F. Yu, R. M. Costello, B. S. Bleier and E. M. Nolan, *J. Am. Chem. Soc.*, 2018, **140**, 17444–17455.
- S11 L. S. Cunden, M. B. Brophy, G. E. Rodriguez, H. A. Flaxman and E. M. Nolan, *Biochemistry*, 2017, **56**, 5726–5738.
- S12 Y. Zhang, F. B. L. Cougnon, Y. A. Wanniarachchi, J. A. Hayden and E. M. Nolan, *ACS Chem. Biol.*, 2013, **8**, 1907–1911.
- S13 W. Maret, C. Jacob, B. L. Vallee and E. H. Fischer, *Proc. Natl. Acad. Sci. U. S. A.*, 1999, **96**, 1936–1940.
- S14 A. P. Lothrop, G. W. Snider, E. L. Ruggles, A. S. Patel, W. J. Lees and R. J. Hondal, *Biochemistry*, 2014, **53**, 654–663.
- S15 J. Chaudière, *Int. J. Mol. Sci.*, 2023, **24**, 10109.
- S16 E. Gasteiger, C. Hoogland, A. Gattiker, S. Duvaud, M. R. Wilkins, R. D. Appel and A. Bairoch, in *The Proteomics Protocols Handbook*, ed. J. M. Walker, Humana Press, Totowa, NJ, 2005, pp. 571–607.
- S17 D. P. Goldenberg, L. S. Bekeart, D. A. Laheru and J. D. Zhou, *Biochemistry*, 1993, **32**, 2835–2844.
- S18 W. Maret and B. L. Vallee, *Proc. Natl. Acad. Sci. U. S. A.*, 1998, **95**, 3478–3482.
- S19 C. L. Colbert, Q. Wu, P. J. A. Erbel, K. H. Gardner and J. Deisenhofer, *Proc. Natl. Acad. Sci. U. S. A.*, 2006, **103**, 4410–4415.
- S20 W. W. Cleland, *Biochemistry*, 1964, **3**, 480–482.
- S21 V. Cracan, D. V. Titov, H. Shen, Z. Grabarek and V. K. Mootha, *Nat. Chem. Biol.*, 2017, **13**, 1088–1095.
- S22 K. M. Cook, H. P. McNeil and P. J. Hogg, *J. Biol. Chem.*, 2013, **288**, 34920–34929.
- S23 J. T. Mason, S.-K. Kim, D. B. Knaff and M. J. Wood, *Biochemistry*, 2006, **45**, 13409–13417.
- S24 G. Krause, J. Lundström, J. L. Barea, C. Pueyo de la Cuesta and A. Holmgren, *J. Biol. Chem.*, 1991, **266**, 9494–9500.
- S25 A. Jordan, F. Åslund, E. Pontis, P. Reichard and A. Holmgren, *J. Biol. Chem.*, 1997, **272**, 18044–18050.
- S26 Z. Salamon, F. K. Gleason and G. Tollin, *Arch. Biochem. Biophys.*, 1992, **299**, 193–198.
- S27 F. Åslund, K. D. Berndt and A. Holmgren, *J. Biol. Chem.*, 1997, **272**, 30780–30786.
- S28 J. Sagemark, PhD thesis, Karolinska Institutet, Stockholm, 2008.

- S29 W. H. Watson, J. Pohl, W. R. Montfort, O. Stuchlik, M. S. Reed, G. Powis and D. P. Jones, *J. Biol. Chem.*, 2003, **278**, 33408–33415.
- S30 D. A. Keire, E. Strauss, W. Guo, B. Noszal and D. L. Rabenstein, *J. Org. Chem.*, 1992, **57**, 123–127.
- S31 X. Jin, J. Stammaes, C. Klöck, T. R. DiRaimondo, L. M. Sollid and C. Khosla, *J. Biol. Chem.*, 2011, **286**, 37866–37873.
- S32 J. E. Chambers, T. J. Tavender, O. B. V. Oka, S. Warwood, D. Knight and N. J. Bulleid, *J. Biol. Chem.*, 2010, **285**, 29200–29207.
- S33 E.-M. Frickel, P. Frei, M. Bouvier, W. F. Stafford, A. Helenius, R. Glockshuber and L. Ellgaard, *J. Biol. Chem.*, 2004, **279**, 18277–18287.
- S34 A. Zapun, D. Missiakas, S. Raina and T. E. Creighton, *Biochemistry*, 1995, **34**, 5075–5089.
- S35 M. van Straaten, D. Missiakas, S. Raina and N. J. Darby, *FEBS Lett.*, 1998, **428**, 255–258.
- S36 A. Zapun, J. C. A. Bardwell and T. E. Creighton, *Biochemistry*, 1993, **32**, 5083–5092.
- S37 T. E. Creighton and D. P. Goldenberg, *J. Mol. Biol.*, 1984, **179**, 497–526.
